# Supplementary material for: Fine-Tuning the Expression of Duplicate Genes by Translational Regulation in Arabidopsis and Maize
Source: Front Plant Sci. 2019 May 8;10:534. doi: 10.3389/fpls.2019.00534 (PMC6530396; doi:10.3389/fpls.2019.00534)
Supplement: TABLE S1 — Mapping information of all analyzed ribo-seq/mRNA-seq data sets. [file Data_Sheet_2.xlsx]

## Sheet: Table S1
		ribo-seq				mRNA-seq
Species	Tissue type or condition	SRR ID	mapped reads	uniquely mapped reads	unique mapping rate	SRR ID	mapped reads	uniquely mapped reads	unique mapping rate
Arabidopsis	seedling	SRR966474	16413080	12775482	0.78	SRR966478	12427487	10073117	0.81
Arabidopsis	seedling	SRR966475	20606946	16207304	0.79	SRR966482	20434431	17240428	0.84
Arabidopsis	seedling (hypoxia)	SRR966472	17529531	13544613	0.77	SRR966479	9445041	7415549	0.79
Arabidopsis	seedling (hypoxia)	SRR966473	15406097	11994725	0.78	SRR966483	13413197	11193834	0.83
Arabidopsis	root	SRR3498206	53652034	43133374	0.8	SRR3498212	14150889	10036240	0.71
Arabidopsis	root	SRR3498207	48767776	39539842	0.81	SRR3498213	17941966	12759727	0.71
Arabidopsis	root	SRR3498208	51717123	41428883	0.8	SRR3498214	18357224	13022589	0.71
Arabidopsis	shoot	SRR3498209	33473855	24275334	0.73	SRR3498215	7816131	5130992	0.66
Arabidopsis	shoot	SRR3498210	79844787	65107010	0.82	SRR3498216	12496577	8602345	0.69
Arabidopsis	shoot	SRR3498211	52529545	42488690	0.81	SRR3498217	12638725	8554679	0.68
maize	seedling	SRR1763106	21089444	13351484	0.63	SRR1765337	7161496	6574981	0.92
maize	seedling	SRR1763107	20551543	13211253	0.64	SRR1765338	7097215	6499602	0.92
maize	seedling (drought)	SRR1765340	9858423	6444086	0.65	SRR1765379	12769247	11871156	0.93
maize	seedling (drought)	SRR1765360	10857326	7073242	0.65	SRR1765380	7951772	7395048	0.93

## Sheet: Table S2
CDS
		GC content		Length		MFE
Species	Tissue type/condition	r	P	r	P	r	P
Arabidopsis	seedling	0.02802	0.197497	0.0497598	0.0220469	0.0713702	0.001016
Arabidopsis	seedling (hypoxia)	-0.0752851	0.000486545	0.0359449	0.0962028	-0.0173238	0.422812
Arabidopsis	root	0.00453339	0.839715	-0.010034	0.654384	-0.0299951	0.180723
Arabidopsis	shoot	-0.0306968	0.179352	-0.0097959	0.668356	-0.0492009	0.0313216
maize	seedling	0.240612	2.33127e-13	-0.0869821	0.00891891	-0.0383113	0.250111
maize	seedling (drought)	0.187891	2.88444e-08	-0.072638	0.0332842	-0.0397574	0.244424
5' UTR
		GC content		Length		MFE
Species	Tissue type/condition	r	P	r	P	r	P
Arabidopsis	seedling	-0.0485049	0.0395119	-0.021623	0.358952	-0.0277746	0.243107
Arabidopsis	seedling (hypoxia)	-0.073872	0.00158403	-0.0183109	0.434224	-0.0143351	0.544111
Arabidopsis	root	-0.00207379	0.932191	-0.0715921	0.0032691	-0.0844946	0.000570839
Arabidopsis	shoot	0.00679028	0.781243	-0.0388015	0.112415	-0.0585912	0.0172343
maize	seedling	0.0197835	0.576338	-0.0768393	0.0297683	-0.0774725	0.0285425
maize	seedling (drought)	0.00894712	0.804983	-0.0458174	0.205868	-0.0539751	0.136338
3' UTR
		GC content		Length		MFE
Species	Tissue type/condition	r	P	r	P	r	P
Arabidopsis	seedling	-0.0395947	0.0875387	-0.0557178	0.0161647	-0.0541799	0.0193516
Arabidopsis	seedling (hypoxia)	-0.0112782	0.6245	-0.0359826	0.118258	-0.0425019	0.064981
Arabidopsis	root	-0.0012968	0.956755	-0.0830282	0.00050548	-0.0742608	0.00187395
Arabidopsis	shoot	-0.00955671	0.691717	-0.0330472	0.170208	-0.025517	0.289647
maize	seedling	0.0560953	0.106538	-0.125307	0.000298376	-0.119076	0.00059139
maize	seedling (drought)	-0.0303231	0.395898	-0.127481	0.000339708	-0.127742	0.000330227

## Sheet: Table S3
CDS
		GC content		Length		MFE
Species	Tissue type/condition	r	P	r	P	r	P
Arabidopsis	seedling	0.014988	0.677763	0.038638	0.283937	0.0333833	0.354599
Arabidopsis	seedling (hypoxia)	-0.0958543	0.0074236	0.140448	8.38215e-05	0.109368	0.00223726
Arabidopsis	root	-0.0604606	0.113887	-0.136322	0.000346106	-0.136844	0.000328237
Arabidopsis	shoot	0.035424	0.389595	-0.057508	0.162285	-0.0521147	0.205447
maize	seedling	0.423877	2.38736e-17	-0.00298006	0.954753	0.135749	0.00941464
maize	seedling (drought)	0.440978	8.42994e-18	-0.0160024	0.76743	0.117049	0.0299688
5' UTR
		GC content		Length		MFE
Species	Tissue type/condition	r	P	r	P	r	P
Arabidopsis	seedling	-0.0940087	0.0312679	-0.123342	0.00465206	-0.116651	0.00882782
Arabidopsis	seedling (hypoxia)	-0.0531274	0.223383	-0.0628246	0.149802	-0.0322179	0.47049
Arabidopsis	root	-0.037817	0.42511	-0.0925849	0.0504431	-0.00897705	0.852747
Arabidopsis	shoot	-0.0766433	0.113353	-0.0653999	0.176858	-0.0269944	0.585276
maize	seedling	0.115742	0.0382126	-0.0365773	0.513758	-0.00527444	0.925122
maize	seedling (drought)	-0.0057098	0.92341	-0.0668349	0.259915	-0.0513432	0.388685
3' UTR
		GC content		Length		MFE
Species	Tissue type/condition	r	P	r	P	r	P
Arabidopsis	seedling	0.0377377	0.364297	0.0226962	0.585418	0.0303718	0.465365
Arabidopsis	seedling (hypoxia)	-0.00943349	0.819741	-0.0370144	0.371099	-0.0442081	0.285339
Arabidopsis	root	0.0314314	0.483592	-0.0420474	0.348591	-0.0361627	0.420682
Arabidopsis	shoot	0.0323769	0.486604	-0.0170874	0.713538	-0.0180866	0.697588
maize	seedling	0.00730384	0.896289	-0.174121	0.00173964	-0.167276	0.00264258
maize	seedling (drought)	0.0477141	0.415813	-0.188807	0.00116507	-0.162434	0.0053187

## Sheet: Table S4
Species	Version	Source
Arabidopsis thaliana	TAIR10	TAIR
Carica papaya	Hawaii Agriculture Research Center	PLAZA v3.0
Citrus sinensis	JGI v1.0	PLAZA v3.0
Fragaria vesca	Strawberry Genome v1.0	PLAZA v3.0
Oropetium thomaeum	JGI v1.0	PLAZA v4.0
Oryza sativa ssp. japonica	RGAP v7	Rice Genome Annotation Project Database
Ricinus communis	JCVI 1.0	PLAZA v3.0
Setaria italic	JGI v2.2	Phytozome v10
Sorghum bicolor	JGI v3.1	Phytozome v10
Theobroma cacao	Cacao Genome Database v1.1	Ensembl
Vitis vinifera	Genoscope	Genoscope
Zea mays	5b.60	MaizeGDB

## Sheet: Table S5
	mRNA-ka		TE-ka		RF-kaks
	r	P-value	r	P-value	r	P-value
Arabidopsis seedling	-0.285273	9.23053e-40	0.0346192	0.13338	-0.087695	6.49117e-05
Arabidopsis seedling (hypoxia)	-0.277633	1.09814e-37	0.0828239	0.000302566	-0.0924852	2.50536e-05
Arabidopsis root	-0.288811	1.69451e-39	0.0346021	0.144264	-0.112557	4.40895e-07
Arabidopsis shoot	-0.266752	1.6496e-32	0.023132	0.336546	-0.0791086	0.000509196
maize seedling	-0.174503	8.25863e-08	0.0173398	0.608084	-0.113428	0.000473394
maize seedling (drought)	-0.178039	9.25881e-08	0.0222534	0.521272	-0.0777103	0.0195857

## Sheet: Table S6
	mRNA-ka		TE-ka		RF-kaks
	r	P-value	r	P-value	r	P-value
Arabidopsis seedling	-0.433638	6.26913e-24	0.0445889	0.367829	-0.159588	0.000326473
Arabidopsis seedling (hypoxia)	-0.433442	8.07633e-25	0.0646642	0.19295	-0.155631	0.000353673
Arabidopsis root	-0.382898	1.01441e-17	0.197132	0.000135309	-0.153788	0.000741961
Arabidopsis shoot	-0.415905	5.924e-18	-0.0156149	0.780483	-0.0988729	0.0462136
maize seedling	-0.189339	0.0168349	0.20876	0.0143604	0.125988	0.103675
maize seedling (drought)	-0.193334	0.0149377	0.193046	0.0254304	0.0393889	0.613285

## Sheet: Table S7
Species	tissue type/condition	geneIDs	disper	pval	padj	TE1	TE2	log2FC_TE(2 vs 1)
Arabidopsis	root vs. shoot	AT3G63160	0.0388686	0	0	75.2122	3.28367	-4.51759
Arabidopsis	root vs. shoot	AT3G27690	0.026678	0	0	40.2194	5.14471	-2.96673
Arabidopsis	root vs. shoot	AT4G08870	0.0397926	0	0	138.707	4.03443	-5.10354
Arabidopsis	root vs. shoot	AT5G20630	0.017895	0	0	51.644	5.90071	-3.12964
Arabidopsis	root vs. shoot	AT5G14740	0.0555325	0	0	73.0063	4.54616	-4.0053
Arabidopsis	root vs. shoot	AT1G29910	0.0380732	0	0	55.5848	4.13704	-3.74802
Arabidopsis	root vs. shoot	AT1G29920	0.0478444	0	0	36.331	3.77485	-3.26671
Arabidopsis	root vs. shoot	AT3G45140	0.050718	0	0	116.295	4.64891	-4.64475
Arabidopsis	root vs. shoot	AT2G26500	0.00951097	0	0	15.8647	4.81316	-1.72077
Arabidopsis	root vs. shoot	AT3G01500	0.025504	0	0	97.0456	6.26065	-3.95428
Arabidopsis	root vs. shoot	AT1G18420	0.0184142	0	0	4.1039	0.544577	-2.91379
Arabidopsis	root vs. shoot	AT2G34430	0.0524184	0	0	92.9756	4.1494	-4.48588
Arabidopsis	root vs. shoot	AT5G26000	0.0322714	0	0	37.0329	4.95626	-2.90148
Arabidopsis	root vs. shoot	AT3G21055	0.0261281	0	0	15.4502	2.33084	-2.7287
Arabidopsis	root vs. shoot	AT5G16030	0.0289273	2.22045e-16	2.93682e-13	35.5355	3.72515	-3.25389
Arabidopsis	root vs. shoot	AT1G19670	0.0550119	2.22045e-16	2.93682e-13	144.461	5.26476	-4.77817
Arabidopsis	root vs. shoot	AT4G28750	0.0176278	3.33067e-16	4.1461e-13	21.8786	5.73579	-1.93146
Arabidopsis	root vs. shoot	AT1G29930	0.0253826	4.44089e-16	5.22101e-13	18.9661	4.10251	-2.20884
Arabidopsis	root vs. shoot	AT1G24020	0.0167214	4.55191e-15	5.06987e-12	23.6705	6.1232	-1.95073
Arabidopsis	root vs. shoot	AT1G67090	0.0363251	6.99441e-15	7.40078e-12	20.035	3.49457	-2.51934
Arabidopsis	root vs. shoot	AT2G21330	0.0462207	8.43769e-15	8.50279e-12	30.7553	4.06702	-2.91879
Arabidopsis	root vs. shoot	AT5G38430	0.0421489	2.80886e-14	2.70187e-11	29.9361	4.29181	-2.80223
Arabidopsis	root vs. shoot	AT1G29090	0.0258145	7.70495e-14	7.08922e-11	31.8809	5.715	-2.47987
Arabidopsis	root vs. shoot	AT1G31860	0.0110924	1.09579e-13	9.66213e-11	0.476723	1.20284	1.33522
Arabidopsis	root vs. shoot	AT1G03630	0.0150194	1.77414e-13	1.50177e-10	21.6736	6.02401	-1.84714
Arabidopsis	root vs. shoot	AT4G28780	0.032709	2.17604e-13	1.77113e-10	46.3843	3.88781	-3.57661
Arabidopsis	root vs. shoot	AT2G05070	0.0292833	2.64233e-13	2.071e-10	19.8577	4.32012	-2.20056
Arabidopsis	root vs. shoot	AT4G22880	0.04444	3.63598e-13	2.74802e-10	42.5657	5.36922	-2.9869
Arabidopsis	root vs. shoot	AT5G60700	0.0389834	4.84723e-13	3.53714e-10	3.75578	0.575346	-2.70661
Arabidopsis	root vs. shoot	AT5G52570	0.0217263	8.10685e-13	5.71857e-10	37.7669	4.72063	-3.00007
Arabidopsis	root vs. shoot	AT1G66970	0.0234746	9.41247e-13	6.42538e-10	15.8784	3.33414	-2.25168
Arabidopsis	root vs. shoot	AT3G51600	0.0518235	1.40954e-12	9.32146e-10	22.1254	2.85117	-2.95608
Arabidopsis	root vs. shoot	AT4G21280	0.0195987	1.84597e-12	1.18377e-09	16.9783	5.15464	-1.71975
Arabidopsis	root vs. shoot	AT1G20340	0.0115629	2.92033e-12	1.81765e-09	14.252	5.78778	-1.30008
Arabidopsis	root vs. shoot	AT3G14420	0.0330117	3.40894e-12	2.06114e-09	21.7169	4.67902	-2.21454
Arabidopsis	root vs. shoot	AT1G76100	0.0299696	6.99785e-12	4.11357e-09	25.7424	4.35406	-2.56372
Arabidopsis	root vs. shoot	AT5G19500	0.088118	9.97658e-12	5.70606e-09	0.117164	1.9038	4.02228
Arabidopsis	root vs. shoot	AT5G42800	0.0530449	1.08163e-11	6.02357e-09	44.2751	5.89162	-2.90976
Arabidopsis	root vs. shoot	AT2G38540	0.0374825	2.95357e-11	1.57195e-08	21.4754	4.56767	-2.23316
Arabidopsis	root vs. shoot	AT1G03550	0.141925	2.97127e-11	1.57195e-08	1.742	0.0309065	-5.81669
Arabidopsis	root vs. shoot	AT1G12900	0.0355347	3.93475e-11	2.03091e-08	15.5163	3.51205	-2.1434
Arabidopsis	root vs. shoot	AT2G42220	0.0543498	7.63321e-11	3.84604e-08	16.8327	2.57169	-2.71048
Arabidopsis	root vs. shoot	AT1G03940	0.051071	8.64609e-11	4.25509e-08	0.11637	3.5744	4.94091
Arabidopsis	root vs. shoot	AT4G27440	0.028856	9.4395e-11	4.53997e-08	26.7075	6.42882	-2.05462
Arabidopsis	root vs. shoot	AT3G13400	0.0956286	1.18887e-10	5.59085e-08	105.142	4.21918	-4.63923
Arabidopsis	root vs. shoot	AT1G15820	0.0242241	1.25673e-10	5.78152e-08	11.1828	3.44981	-1.6967
Arabidopsis	root vs. shoot	AT5G27890	0.269758	1.42939e-10	6.43592e-08	247.298	0.763315	-8.33975
Arabidopsis	root vs. shoot	AT5G38420	0.097913	1.96443e-10	8.6607e-08	24.8257	2.21568	-3.48601
Arabidopsis	root vs. shoot	AT5G65410	0.0644209	2.78335e-10	1.19285e-07	26.6	2.29817	-3.53287
Arabidopsis	root vs. shoot	AT1G08380	0.0312606	2.81838e-10	1.19285e-07	9.73272	2.58794	-1.91104
Arabidopsis	root vs. shoot	AT3G46780	0.0383084	4.06631e-10	1.68728e-07	16.8036	3.7214	-2.17485
Arabidopsis	root vs. shoot	AT4G05631	0.270359	5.1737e-10	2.1055e-07	0.481636	0.00733056	-6.03788
Arabidopsis	root vs. shoot	AT3G04290	0.0341681	7.20911e-10	2.87847e-07	23.0669	5.4026	-2.0941
Arabidopsis	root vs. shoot	AT1G66940	0.0670255	7.61164e-10	2.98292e-07	53.7092	2.91047	-4.20585
Arabidopsis	root vs. shoot	AT2G47780	0.115373	9.93918e-10	3.82423e-07	34.4274	2.2983	-3.90492
Arabidopsis	root vs. shoot	AT3G54050	0.0381849	1.34174e-09	4.8955e-07	16.9124	3.99855	-2.08053
Arabidopsis	root vs. shoot	AT3G14210	0.0894611	1.31168e-09	4.8955e-07	42.4204	4.2372	-3.32357
Arabidopsis	root vs. shoot	AT3G20362	0.668146	1.32236e-09	4.8955e-07	3.2631	0.00309774	-10.0408
Arabidopsis	root vs. shoot	AT1G73310	0.144838	1.55164e-09	5.47262e-07	2.02308	0.107209	-4.23806
Arabidopsis	root vs. shoot	AT1G62780	0.0124452	1.531e-09	5.47262e-07	17.3372	6.08438	-1.51069
Arabidopsis	root vs. shoot	AT4G18770	0.939149	2.02928e-09	7.03992e-07	0.110906	1272.19	13.4857
Arabidopsis	root vs. shoot	AT1G33890	0.920313	2.07955e-09	7.05528e-07	1.7707	3588.09	10.9847
Arabidopsis	root vs. shoot	AT3G47470	0.0123536	2.10038e-09	7.05528e-07	10.496	4.80878	-1.1261
Arabidopsis	root vs. shoot	AT1G80130	0.165857	2.19604e-09	7.26133e-07	75.9308	4.41215	-4.10513
Arabidopsis	root vs. shoot	AT3G26650	0.0294281	2.86214e-09	9.31824e-07	16.6581	4.98804	-1.73968
Arabidopsis	root vs. shoot	AT1G12860	0.0605887	3.31278e-09	1.03096e-06	22.8615	3.06453	-2.89918
Arabidopsis	root vs. shoot	AT3G47250	0.045439	3.30443e-09	1.03096e-06	45.2792	2.67218	-4.08276
Arabidopsis	root vs. shoot	AT1G77530	0.721875	3.25732e-09	1.03096e-06	2.67512	7958.8	11.5387
Arabidopsis	root vs. shoot	AT5G23060	0.0180982	3.97661e-09	1.20219e-06	16.5122	5.96481	-1.46899
Arabidopsis	root vs. shoot	AT3G61470	0.0322723	3.96482e-09	1.20219e-06	13.0189	3.73952	-1.79968
Arabidopsis	root vs. shoot	AT4G38970	0.0134682	4.46617e-09	1.33117e-06	12.7332	5.72051	-1.15438
Arabidopsis	root vs. shoot	AT1G33811	0.0492046	5.46801e-09	1.60714e-06	42.8083	5.26513	-3.02335
Arabidopsis	root vs. shoot	AT2G10940	0.0557384	7.09389e-09	2.05645e-06	25.7535	4.92681	-2.38604
Arabidopsis	root vs. shoot	AT1G61800	0.0425038	7.8272e-09	2.20852e-06	44.9853	6.88335	-2.70827
Arabidopsis	root vs. shoot	AT1G49975	0.0926233	7.81138e-09	2.20852e-06	41.3613	4.11604	-3.32896
Arabidopsis	root vs. shoot	AT1G22690	0.0540477	8.49121e-09	2.36435e-06	140.579	4.2838	-5.03635
Arabidopsis	root vs. shoot	AT4G28520	0.0737015	9.18016e-09	2.52299e-06	68.9788	3.31743	-4.37802
Arabidopsis	root vs. shoot	AT3G63140	0.0258182	9.48382e-09	2.57303e-06	11.4312	3.5216	-1.69867
Arabidopsis	root vs. shoot	AT5G25980	0.0303403	1.08407e-08	2.86956e-06	42.7749	5.07432	-3.07548
Arabidopsis	root vs. shoot	AT3G54890	0.0207933	1.0848e-08	2.86956e-06	11.9858	4.52159	-1.40642
Arabidopsis	root vs. shoot	AT5G62470	0.0777382	1.16144e-08	3.03438e-06	0.213539	3.58802	4.07062
Arabidopsis	root vs. shoot	AT3G15518	0.256044	1.42668e-08	3.64147e-06	3.89123	0.0919532	-5.40318
Arabidopsis	root vs. shoot	AT4G00180	0.0941888	1.42823e-08	3.64147e-06	56.0524	2.56163	-4.45164
Arabidopsis	root vs. shoot	AT2G45600	0.19055	1.60362e-08	3.99246e-06	144.425	4.06413	-5.15123
Arabidopsis	root vs. shoot	AT5G04730	0.0845406	1.60099e-08	3.99246e-06	4.93993	90.99	4.20315
Arabidopsis	root vs. shoot	AT3G26060	0.0132344	1.67526e-08	4.1223e-06	17.5966	7.18766	-1.2917
Arabidopsis	root vs. shoot	AT4G12800	0.0280057	1.79558e-08	4.36759e-06	13.9268	4.566	-1.60886
Arabidopsis	root vs. shoot	AT5G38410	0.0503835	1.99462e-08	4.7966e-06	21.8752	4.92495	-2.15111
Arabidopsis	root vs. shoot	AT2G26250	0.0150521	2.11665e-08	5.03288e-06	9.84353	4.31132	-1.19105
Arabidopsis	root vs. shoot	AT2G23030	0.175194	3.21117e-08	7.55052e-06	2.88925	0.0895913	-5.01119
Arabidopsis	root vs. shoot	AT4G38390	0.0885811	3.41943e-08	7.95187e-06	8.60019	77.5299	3.17231
Arabidopsis	root vs. shoot	AT1G52220	0.034463	4.33538e-08	9.97233e-06	16.8616	4.69828	-1.84353
Arabidopsis	root vs. shoot	AT3G16140	0.0188494	5.50836e-08	1.25342e-05	12.2977	4.90189	-1.32698
Arabidopsis	root vs. shoot	AT1G01480	0.0742593	6.30155e-08	1.40372e-05	5.97493	0.846273	-2.81973
Arabidopsis	root vs. shoot	AT1G52230	0.0486669	6.25339e-08	1.40372e-05	14.8846	3.52739	-2.07714
Arabidopsis	root vs. shoot	AT4G02420	0.190387	6.52036e-08	1.43733e-05	91.4736	4.05546	-4.49542
Arabidopsis	root vs. shoot	AT3G29590	0.0379531	7.36458e-08	1.60669e-05	30.7557	4.5378	-2.76079
Arabidopsis	root vs. shoot	AT2G05100	0.025884	8.38787e-08	1.8016e-05	11.4515	4.11477	-1.47665
Arabidopsis	root vs. shoot	AT1G55670	0.018749	8.42824e-08	1.8016e-05	18.6223	7.568	-1.29905
Arabidopsis	root vs. shoot	AT3G56940	0.0128065	8.80758e-08	1.86386e-05	12.3807	6.06213	-1.03019
Arabidopsis	root vs. shoot	AT4G39260	0.010297	9.2347e-08	1.9349e-05	6.60491	12.7295	0.946569
Arabidopsis	root vs. shoot	AT1G14687	0.207067	1.04809e-07	2.17448e-05	143.283	5.40293	-4.72898
Arabidopsis	root vs. shoot	AT3G09390	0.0178878	1.16526e-07	2.3941e-05	9.31341	3.90988	-1.25219
Arabidopsis	root vs. shoot	AT2G15300	0.0582595	1.25945e-07	2.56274e-05	6.35466	1.07745	-2.56019
Arabidopsis	root vs. shoot	AT1G72610	0.0487186	1.40424e-07	2.83015e-05	24.2133	5.84114	-2.05148
Arabidopsis	root vs. shoot	AT2G29290	0.124348	1.55263e-07	3.09969e-05	54.1842	2.04484	-4.72781
Arabidopsis	root vs. shoot	AT4G16400	0.108434	1.6457e-07	3.2548e-05	4.68851	0.558455	-3.06961
Arabidopsis	root vs. shoot	AT3G62410	0.0299721	1.85664e-07	3.63799e-05	17.5115	4.19913	-2.06014
Arabidopsis	root vs. shoot	AT1G78940	0.744804	2.00758e-07	3.89765e-05	1.52896	622.381	8.6691
Arabidopsis	root vs. shoot	AT3G12060	0.795802	2.06347e-07	3.96975e-05	5.33737	3017.9	9.1432
Arabidopsis	root vs. shoot	AT4G10340	0.0221869	2.44264e-07	4.65686e-05	11.5656	4.70483	-1.29762
Arabidopsis	root vs. shoot	AT3G51895	0.0925145	3.0629e-07	5.78724e-05	76.7714	8.19259	-3.22818
Arabidopsis	root vs. shoot	AT1G61520	0.0212676	3.69105e-07	6.91238e-05	9.0272	3.78483	-1.25405
Arabidopsis	root vs. shoot	AT5G24240	0.408609	4.15238e-07	7.70813e-05	3.17991	209.67	6.04299
Arabidopsis	root vs. shoot	AT1G27480	0.172217	4.65582e-07	8.56751e-05	29.0222	2.07739	-3.80432
Arabidopsis	root vs. shoot	AT2G43480	0.113242	4.87902e-07	8.90085e-05	4.91691	0.313355	-3.97188
Arabidopsis	root vs. shoot	AT4G14250	0.726291	5.06802e-07	9.08893e-05	0.761552	324.608	8.73554
Arabidopsis	root vs. shoot	AT4G22753	0.0913564	5.05189e-07	9.08893e-05	54.925	2.58104	-4.41144
Arabidopsis	root vs. shoot	AT2G35370	0.0506039	5.61784e-07	9.99031e-05	22.0622	5.18565	-2.08898
Arabidopsis	root vs. shoot	AT5G46350	0.773111	5.79196e-07	0.000102141	0.73942	565.696	9.57942
Arabidopsis	root vs. shoot	AT3G01440	0.0676684	6.10465e-07	0.000106766	51.9626	5.18791	-3.32425
Arabidopsis	root vs. shoot	AT1G56120	0.803303	6.36897e-07	0.000110476	0.994584	425.672	8.74143
Arabidopsis	root vs. shoot	AT4G01150	0.0159668	7.30389e-07	0.000125662	12.7651	6.00789	-1.08728
Arabidopsis	root vs. shoot	AT3G44570	0.390736	7.5125e-07	0.000128209	0.121578	12.448	6.67789
Arabidopsis	root vs. shoot	AT2G22990	0.0314919	8.28795e-07	0.000140312	1.21043	3.65459	1.59419
Arabidopsis	root vs. shoot	AT2G30570	0.0356717	8.40237e-07	0.00014112	11.3745	3.77407	-1.5916
Arabidopsis	root vs. shoot	AT3G55800	0.0311046	8.86517e-07	0.00014772	19.4647	6.79615	-1.51807
Arabidopsis	root vs. shoot	AT5G08360	0.119938	9.35465e-07	0.000154659	246.66	28.0665	-3.1356
Arabidopsis	root vs. shoot	AT2G13360	0.0189628	9.67085e-07	0.000158647	8.60597	3.8392	-1.16453
Arabidopsis	root vs. shoot	AT1G09340	0.0238849	1.01524e-06	0.000165266	15.6483	6.21752	-1.33159
Arabidopsis	root vs. shoot	AT5G07130	0.331115	1.10978e-06	0.000179276	2.56989	0.0284173	-6.4988
Arabidopsis	root vs. shoot	AT2G18160	0.0527198	1.11922e-06	0.000179431	0.509127	0.129537	-1.97466
Arabidopsis	root vs. shoot	AT3G14460	0.195434	1.15272e-06	0.000183412	2.41605	0.133872	-4.17373
Arabidopsis	root vs. shoot	AT3G08940	0.0201587	1.17704e-06	0.000185885	12.1076	5.29717	-1.19262
Arabidopsis	root vs. shoot	AT4G28650	0.0832895	1.22185e-06	0.000191531	4.30395	23.1707	2.42857
Arabidopsis	root vs. shoot	AT5G40500	0.113637	1.26949e-06	0.000197537	0.195424	2.9543	3.91814
Arabidopsis	root vs. shoot	AT1G80380	0.00916965	1.33185e-06	0.000205727	3.26948	5.68364	0.797755
Arabidopsis	root vs. shoot	AT2G24270	0.0369436	1.44197e-06	0.000221123	14.497	4.66053	-1.63719
Arabidopsis	root vs. shoot	AT3G14530	0.0892281	1.53849e-06	0.000233118	3.32966	0.102885	-5.01627
Arabidopsis	root vs. shoot	AT5G15581	0.456766	1.54222e-06	0.000233118	1.31829	0.0353443	-5.22105
Arabidopsis	root vs. shoot	AT4G35420	0.203907	1.56297e-06	0.000234578	5.09255	0.297657	-4.09667
Arabidopsis	root vs. shoot	AT2G20250	0.214361	1.84453e-06	0.000274886	59.8207	2.60691	-4.52023
Arabidopsis	root vs. shoot	AT1G21500	0.0603757	1.89252e-06	0.000278121	20.621	3.70159	-2.4779
Arabidopsis	root vs. shoot	AT1G32470	0.0552458	1.88557e-06	0.000278121	22.977	5.77765	-1.99163
Arabidopsis	root vs. shoot	AT4G21380	0.225598	2.21125e-06	0.000322721	131.694	4.26482	-4.94856
Arabidopsis	root vs. shoot	AT5G66570	0.0202816	2.22798e-06	0.000322935	8.40065	3.82841	-1.13376
Arabidopsis	root vs. shoot	AT1G17840	0.0297534	2.30294e-06	0.00033153	9.19233	3.42886	-1.4227
Arabidopsis	root vs. shoot	AT5G50335	0.0879513	2.32136e-06	0.000331924	22.8637	2.53835	-3.1711
Arabidopsis	root vs. shoot	AT1G68890	0.0460176	2.48474e-06	0.0003529	4.8783	1.41142	-1.78923
Arabidopsis	root vs. shoot	AT1G32060	0.0401555	2.64753e-06	0.000373514	20.5526	6.66354	-1.62496
Arabidopsis	root vs. shoot	AT5G04280	0.0151837	2.82625e-06	0.000396087	3.86968	7.92027	1.03333
Arabidopsis	root vs. shoot	AT1G60090	0.261824	3.33252e-06	0.000463965	137.886	1.86353	-6.20929
Arabidopsis	root vs. shoot	AT1G12150	0.0381523	3.40623e-06	0.000471128	6.45774	1.16655	-2.46878
Arabidopsis	root vs. shoot	AT4G25990	0.318582	3.64438e-06	0.00049896	26.4266	2.10662	-3.64899
Arabidopsis	root vs. shoot	AT5G01530	0.0326141	3.65461e-06	0.00049896	12.8848	4.83451	-1.41423
Arabidopsis	root vs. shoot	AT1G13420	0.0291286	3.68185e-06	0.000499458	4.44329	14.9662	1.75201
Arabidopsis	root vs. shoot	AT1G74490	0.681301	3.74869e-06	0.000502088	1.79547	246.625	7.10181
Arabidopsis	root vs. shoot	AT1G23130	0.095387	3.74768e-06	0.000502088	39.7194	8.27447	-2.26311
Arabidopsis	root vs. shoot	AT1G64130	0.548675	3.86731e-06	0.000514717	0.226741	0.00313595	-6.176
Arabidopsis	root vs. shoot	AT5G67310	1.12188	4.00246e-06	0.000529376	0.605293	820.609	10.4048
Arabidopsis	root vs. shoot	AT5G04140	0.0406762	4.21057e-06	0.000553442	12.131	4.07356	-1.57433
Arabidopsis	root vs. shoot	AT4G09650	0.0116884	4.28087e-06	0.000559208	13.8061	7.57896	-0.865232
Arabidopsis	root vs. shoot	AT5G14570	0.111133	4.33983e-06	0.000563432	0.481602	4.60331	3.25676
Arabidopsis	root vs. shoot	AT2G44430	0.489449	4.61265e-06	0.000595201	2.27612	122.61	5.75136
Arabidopsis	root vs. shoot	AT3G12915	0.191397	4.94337e-06	0.00063401	16.6958	1.43305	-3.54232
Arabidopsis	root vs. shoot	AT4G05170	0.118628	5.17824e-06	0.000660132	3.82347	0.0899237	-5.41004
Arabidopsis	root vs. shoot	AT3G07550	0.27393	5.6281e-06	0.000713184	0.317335	6.17498	4.28236
Arabidopsis	root vs. shoot	AT4G34190	0.0185099	5.84485e-06	0.000736242	7.23385	3.29362	-1.13509
Arabidopsis	root vs. shoot	AT1G34315	0.371132	6.31883e-06	0.000791237	0.743492	0.0115676	-6.00615
Arabidopsis	root vs. shoot	AT1G28815	0.238331	6.58142e-06	0.000819271	2.18671	0.136336	-4.00352
Arabidopsis	root vs. shoot	AT2G21060	0.0364052	6.75121e-06	0.000830634	5.1294	15.1951	1.56675
Arabidopsis	root vs. shoot	AT3G59930	0.0201928	6.73983e-06	0.000830634	6.74504	2.43282	-1.4712
Arabidopsis	root vs. shoot	AT5G46730	0.0278116	7.3001e-06	0.000892975	7.62887	19.195	1.33119
Arabidopsis	root vs. shoot	AT5G44860	0.0213691	7.4835e-06	0.000909669	3.57761	8.40932	1.23299
Arabidopsis	root vs. shoot	AT4G34250	0.0847218	7.52255e-06	0.000909669	23.4058	4.10726	-2.51062
Arabidopsis	root vs. shoot	AT1G76080	0.0209801	7.59649e-06	0.000910899	12.3781	5.58077	-1.14926
Arabidopsis	root vs. shoot	AT1G57770	0.0500969	7.6188e-06	0.000910899	11.8282	2.59929	-2.18604
Arabidopsis	root vs. shoot	AT2G06520	0.0209617	7.71605e-06	0.000917343	11.4664	5.32968	-1.10529
Arabidopsis	root vs. shoot	AT5G56850	0.101024	7.90292e-06	0.000923987	12.1478	1.84393	-2.71984
Arabidopsis	root vs. shoot	AT1G19150	0.14689	7.82403e-06	0.000923987	29.4444	2.83214	-3.37803
Arabidopsis	root vs. shoot	AT4G25050	0.0437064	7.8782e-06	0.000923987	13.3384	4.28047	-1.63975
Arabidopsis	root vs. shoot	AT4G08450	0.553157	8.24794e-06	0.000959027	2.32035	241.887	6.70385
Arabidopsis	root vs. shoot	AT5G44510	0.160466	8.29692e-06	0.000959451	2.3343	0.273115	-3.09541
Arabidopsis	root vs. shoot	AT2G31141	0.462839	8.80237e-06	0.00101237	0.0625682	0.00150434	-5.37823
Arabidopsis	root vs. shoot	AT1G60950	0.00999862	8.93743e-06	0.00101685	6.80978	4.02035	-0.760289
Arabidopsis	root vs. shoot	AT4G22270	0.105454	8.89374e-06	0.00101685	2.23008	0.397825	-2.48689
Arabidopsis	root vs. shoot	AT1G05190	0.0153058	9.06814e-06	0.0010262	10.8528	5.36713	-1.01584
Arabidopsis	root vs. shoot	AT3G02930	0.559063	9.37877e-06	0.00105571	4.12959	260.472	5.97898
Arabidopsis	root vs. shoot	AT3G26610	0.401234	9.71924e-06	0.00108825	4.34931	155.156	5.15679
Arabidopsis	root vs. shoot	AT2G39730	0.0188324	9.83526e-06	0.00109544	11.5655	5.71023	-1.0182
Arabidopsis	root vs. shoot	AT5G54270	0.0211348	1.02735e-05	0.00113827	10.1687	4.81203	-1.07942
Arabidopsis	root vs. shoot	AT5G53905	0.758849	1.03925e-05	0.00114156	0.0587286	0.000366074	-7.32579
Arabidopsis	root vs. shoot	AT1G07010	0.0397985	1.05191e-05	0.00114156	10.3064	3.3546	-1.61934
Arabidopsis	root vs. shoot	AT1G42970	0.0487586	1.04907e-05	0.00114156	10.841	3.46156	-1.64701
Arabidopsis	root vs. shoot	AT3G15030	0.158674	1.04262e-05	0.00114156	9.32908	1.12003	-3.0582
Arabidopsis	root vs. shoot	AT4G16990	0.157203	1.09516e-05	0.00117643	19.8226	2.02411	-3.29179
Arabidopsis	root vs. shoot	AT1G44575	0.0144252	1.09305e-05	0.00117643	10.4978	5.60693	-0.904811
Arabidopsis	root vs. shoot	AT1G05280	0.648041	1.13076e-05	0.00120854	3.92112	462.443	6.88187
Arabidopsis	root vs. shoot	AT3G15200	0.341164	1.21676e-05	0.00129392	1.22349	0.0510098	-4.58408
Arabidopsis	root vs. shoot	AT1G45191	0.0362577	1.23069e-05	0.00130219	9.13809	2.72873	-1.74366
Arabidopsis	root vs. shoot	AT5G63087	0.323939	1.2444e-05	0.00130617	0.354093	10.065	4.82908
Arabidopsis	root vs. shoot	AT1G78430	0.105725	1.2468e-05	0.00130617	1.25718	7.85323	2.6431
Arabidopsis	root vs. shoot	AT1G53680	0.0585093	1.27496e-05	0.0013291	4.81407	0.870123	-2.46797
Arabidopsis	root vs. shoot	AT4G18290	0.233158	1.29487e-05	0.00134324	193.439	3.77135	-5.68066
Arabidopsis	root vs. shoot	AT3G47430	0.0570772	1.31236e-05	0.00135473	11.4229	2.41459	-2.24208
Arabidopsis	root vs. shoot	AT1G54940	0.0471689	1.41666e-05	0.00145531	4.86851	1.02524	-2.24752
Arabidopsis	root vs. shoot	AT4G25350	0.588169	1.42496e-05	0.00145677	3.63781	251.003	6.10849
Arabidopsis	root vs. shoot	AT3G51380	0.215732	1.48849e-05	0.00151439	4.31207	0.171551	-4.65167
Arabidopsis	root vs. shoot	AT4G31980	0.0462545	1.5499e-05	0.00156833	1.65613	0.557058	-1.57192
Arabidopsis	root vs. shoot	AT3G62420	0.0978778	1.55632e-05	0.00156833	0.944968	0.179841	-2.39354
Arabidopsis	root vs. shoot	AT5G07100	0.168	1.61899e-05	0.00161609	3.66002	0.257534	-3.82901
Arabidopsis	root vs. shoot	AT1G67740	0.0242192	1.6149e-05	0.00161609	15.6172	6.93066	-1.17207
Arabidopsis	root vs. shoot	AT1G59850	0.0783321	1.73727e-05	0.00172602	3.04209	0.66955	-2.1838
Arabidopsis	root vs. shoot	AT1G16160	0.192618	1.74732e-05	0.00172789	3.08027	0.0431754	-6.1567
Arabidopsis	root vs. shoot	AT5G09660	0.0755635	1.8076e-05	0.00177918	16.5219	3.97968	-2.05366
Arabidopsis	root vs. shoot	AT5G05340	0.609271	1.87068e-05	0.00183275	1.61316	167.66	6.6995
Arabidopsis	root vs. shoot	AT2G43970	0.0220054	1.90897e-05	0.0018531	0.642982	1.36797	1.08918
Arabidopsis	root vs. shoot	AT1G06680	0.0229234	1.90199e-05	0.0018531	10.039	4.71183	-1.09125
Arabidopsis	root vs. shoot	AT5G54770	0.0213501	1.96437e-05	0.00189818	13.0128	6.26097	-1.05547
Arabidopsis	root vs. shoot	AT3G28270	0.0432414	2.02411e-05	0.00194701	29.7402	7.16922	-2.05253
Arabidopsis	root vs. shoot	AT3G10405	0.0771923	2.13367e-05	0.00204311	11.0096	2.53346	-2.11958
Arabidopsis	root vs. shoot	AT4G25960	0.02841	2.16589e-05	0.00206462	6.67705	2.75122	-1.27914
Arabidopsis	root vs. shoot	AT1G75390	0.201872	2.17825e-05	0.00206709	1.00856	0.0962459	-3.38943
Arabidopsis	root vs. shoot	AT4G03280	0.016964	2.34621e-05	0.00221654	11.19	5.74026	-0.963027
Arabidopsis	root vs. shoot	AT4G22640	0.0937792	2.35877e-05	0.0022185	4.86876	0.345617	-3.81631
Arabidopsis	root vs. shoot	AT4G21745	0.104301	2.58421e-05	0.00241978	3.98469	44.1359	3.46941
Arabidopsis	root vs. shoot	AT1G24485	0.290083	2.60933e-05	0.00243254	9.37654	248.186	4.72622
Arabidopsis	root vs. shoot	AT4G02970	0.413829	2.68883e-05	0.00249566	0.0367774	0.00134206	-4.7763
Arabidopsis	root vs. shoot	AT3G03700	0.490429	2.73627e-05	0.0025204	2.0808	0.0297449	-6.12836
Arabidopsis	root vs. shoot	AT1G31950	0.0691434	2.7393e-05	0.0025204	3.58786	0.517424	-2.7937
Arabidopsis	root vs. shoot	AT1G53120	0.503214	2.92209e-05	0.00267694	2.33523	90.3737	5.27426
Arabidopsis	root vs. shoot	AT1G03660	0.359198	2.96166e-05	0.0027015	4.09148	0.11976	-5.09441
Arabidopsis	root vs. shoot	AT1G61950	0.106914	2.99063e-05	0.00271621	4.13697	110.393	4.73793
Arabidopsis	root vs. shoot	AT1G16420	0.248678	3.22271e-05	0.00291448	2.31982	0.124004	-4.22555
Arabidopsis	root vs. shoot	AT5G51680	0.169778	3.29142e-05	0.00296396	2.16119	0.251826	-3.10133
Arabidopsis	root vs. shoot	AT2G29630	0.0160837	3.30973e-05	0.00296781	11.226	5.8118	-0.949788
Arabidopsis	root vs. shoot	AT4G04640	0.0113161	3.39619e-05	0.0030325	9.08414	5.37548	-0.756956
Arabidopsis	root vs. shoot	AT3G10840	0.0296	3.52659e-05	0.0031357	10.5772	3.46975	-1.60806
Arabidopsis	root vs. shoot	AT4G05180	0.0255447	3.60319e-05	0.0031904	10.232	4.67636	-1.12963
Arabidopsis	root vs. shoot	AT1G45010	0.0890683	3.64271e-05	0.00321196	15.6515	3.13098	-2.32161
Arabidopsis	root vs. shoot	AT4G28080	0.0570894	3.67413e-05	0.00322623	11.0582	3.46757	-1.67312
Arabidopsis	root vs. shoot	AT5G61270	0.186718	3.75782e-05	0.00327255	29.7367	2.86311	-3.37659
Arabidopsis	root vs. shoot	AT3G62600	0.0103433	3.75135e-05	0.00327255	4.59957	7.59922	0.724352
Arabidopsis	root vs. shoot	AT2G17050	0.549686	3.88906e-05	0.00336235	3.92406	542.785	7.11189
Arabidopsis	root vs. shoot	AT5G27270	0.0190346	3.89271e-05	0.00336235	2.86394	5.84521	1.02926
Arabidopsis	root vs. shoot	AT5G09860	0.137698	4.13597e-05	0.00355795	3.49437	0.584286	-2.58029
Arabidopsis	root vs. shoot	AT5G02130	0.0410019	4.18723e-05	0.00358746	4.71308	1.69847	-1.47243
Arabidopsis	root vs. shoot	AT4G29310	0.0471853	4.25662e-05	0.0036322	10.0942	3.47034	-1.54037
Arabidopsis	root vs. shoot	AT3G47740	0.600062	4.31864e-05	0.00365871	1.01443	61.8511	5.93005
Arabidopsis	root vs. shoot	AT1G64510	0.0203646	4.32226e-05	0.00365871	8.56871	4.18875	-1.03256
Arabidopsis	root vs. shoot	AT4G14630	0.382848	4.55297e-05	0.00382849	4.3901	99.5623	4.50327
Arabidopsis	root vs. shoot	AT1G32080	0.0802492	4.55902e-05	0.00382849	16.532	3.87441	-2.09321
Arabidopsis	root vs. shoot	AT1G52100	0.0796418	4.78098e-05	0.00399901	20.7202	5.17881	-2.00035
Arabidopsis	root vs. shoot	AT3G62390	0.0486295	4.89161e-05	0.00407544	3.38862	1.13918	-1.5727
Arabidopsis	root vs. shoot	AT5G44440	0.107441	4.95938e-05	0.00409962	68.1052	7.44667	-3.1931
Arabidopsis	root vs. shoot	AT5G46890	0.333052	4.95592e-05	0.00409962	3.14328	187.599	5.89924
Arabidopsis	root vs. shoot	AT1G32780	0.153623	5.22427e-05	0.00430179	38.2435	3.39213	-3.49495
Arabidopsis	root vs. shoot	AT1G09500	0.236275	5.30447e-05	0.0043509	104.706	5.18453	-4.33599
Arabidopsis	root vs. shoot	AT1G69810	0.506316	5.36821e-05	0.00438618	2.6364	91.5034	5.11719
Arabidopsis	root vs. shoot	AT1G02930	0.0145471	5.57152e-05	0.00453479	9.80558	5.44407	-0.848918
Arabidopsis	root vs. shoot	AT2G32620	0.730241	5.67523e-05	0.00456651	2.78148	251.507	6.4986
Arabidopsis	root vs. shoot	AT2G29070	0.535553	5.66974e-05	0.00456651	4.9437	188.405	5.2521
Arabidopsis	root vs. shoot	AT2G41010	0.151442	5.67264e-05	0.00456651	0.534413	3.8729	2.85739
Arabidopsis	root vs. shoot	AT5G04530	0.0239219	5.81088e-05	0.00465795	16.4401	7.32967	-1.1654
Arabidopsis	root vs. shoot	AT3G02468	0.0159895	5.86456e-05	0.00468324	3.54353	1.95194	-0.860279
Arabidopsis	root vs. shoot	AT2G25870	0.0133116	6.10394e-05	0.00485468	1.88987	3.29976	0.80407
Arabidopsis	root vs. shoot	AT1G25440	0.0706693	6.12512e-05	0.00485468	9.91171	2.59252	-1.93478
Arabidopsis	root vs. shoot	AT4G04570	0.062961	6.26142e-05	0.00492772	16.0032	3.93176	-2.02512
Arabidopsis	root vs. shoot	AT2G39470	0.0560929	6.26385e-05	0.00492772	17.2757	3.81871	-2.17758
Arabidopsis	root vs. shoot	AT5G17860	0.288692	6.35652e-05	0.00496371	116.354	3.66199	-4.98975
Arabidopsis	root vs. shoot	AT4G38860	0.429132	6.3341e-05	0.00496371	22.3221	2.37826	-3.23049
Arabidopsis	root vs. shoot	AT1G48660	0.169784	6.55789e-05	0.00510214	22.6844	2.68905	-3.07653
Arabidopsis	root vs. shoot	AT5G39240	0.14332	6.90432e-05	0.00533246	2.94681	0.0550202	-5.74305
Arabidopsis	root vs. shoot	AT3G46500	0.225599	6.89227e-05	0.00533246	2.37313	0.0877496	-4.75725
Arabidopsis	root vs. shoot	AT2G43560	0.0410239	6.95011e-05	0.0053483	11.9025	4.06567	-1.5497
Arabidopsis	root vs. shoot	AT2G32870	0.251921	7.19814e-05	0.0055191	47.1461	8.59697	-2.45524
Arabidopsis	root vs. shoot	AT3G45720	1.09813	7.25239e-05	0.00554061	4.0584	379.721	6.54789
Arabidopsis	root vs. shoot	AT3G06880	0.116222	7.36367e-05	0.0056054	12.5161	2.06787	-2.59757
Arabidopsis	root vs. shoot	AT5G07780	0.255084	7.53717e-05	0.0057169	4.45462	0.171935	-4.69537
Arabidopsis	root vs. shoot	AT3G25760	0.144051	7.62852e-05	0.00576553	0.740132	7.41134	3.32388
Arabidopsis	root vs. shoot	AT4G37380	0.29031	7.7286e-05	0.00582038	0.27278	4.11384	3.91467
Arabidopsis	root vs. shoot	AT4G09030	0.0511936	7.94013e-05	0.00595848	2.46054	7.46155	1.6005
Arabidopsis	root vs. shoot	AT3G17280	0.382782	8.29516e-05	0.0062029	0.39586	10.4092	4.71673
Arabidopsis	root vs. shoot	AT5G65260	0.110583	8.59701e-05	0.00640598	3.82132	0.817972	-2.22395
Arabidopsis	root vs. shoot	AT4G08400	0.0929952	9.1074e-05	0.00676249	2.08303	11.9318	2.51805
Arabidopsis	root vs. shoot	AT2G18560	0.365744	9.15901e-05	0.00677703	0.0399452	1.17022	4.87261
Arabidopsis	root vs. shoot	AT2G28440	0.187477	9.33608e-05	0.00688397	3.48975	0.31724	-3.45947
Arabidopsis	root vs. shoot	AT5G59130	0.119411	9.45227e-05	0.00694545	18.7927	3.14231	-2.58028
Arabidopsis	root vs. shoot	AT4G32860	0.376711	9.84198e-05	0.00718193	4.47872	87.2074	4.28329
Arabidopsis	root vs. shoot	AT3G57680	0.410245	9.82457e-05	0.00718193	532.905	16.321	-5.02908
Arabidopsis	root vs. shoot	AT2G20260	0.0191597	0.000103327	0.00751413	8.64972	4.46394	-0.954337
Arabidopsis	root vs. shoot	AT4G21430	0.486026	0.000111323	0.00804032	1.99284	53.6498	4.75067
Arabidopsis	root vs. shoot	AT2G46820	0.0290947	0.000111262	0.00804032	11.1606	5.05505	-1.14262
Arabidopsis	root vs. shoot	AT4G01350	0.507795	0.000112617	0.00809841	3.16707	94.551	4.89987
Arabidopsis	root vs. shoot	AT5G20740	0.146391	0.000112892	0.00809841	31.3327	3.41931	-3.19589
Arabidopsis	root vs. shoot	AT1G03130	0.0463639	0.000113596	0.00812136	18.5163	6.53001	-1.50364
Arabidopsis	root vs. shoot	AT2G19910	0.231563	0.00011445	0.00815484	37.0901	2.71534	-3.77183
Arabidopsis	root vs. shoot	AT5G53200	0.26508	0.000119877	0.00851288	0.23664	4.01885	4.08602
Arabidopsis	root vs. shoot	AT3G54800	0.503049	0.000121122	0.00857249	4.56545	83.5558	4.19391
Arabidopsis	root vs. shoot	AT4G26530	0.283539	0.000121785	0.00859074	20.7021	3.8138	-2.44047
Arabidopsis	root vs. shoot	AT1G68945	0.309962	0.000122868	0.00863829	2.38976	0.175917	-3.7639
Arabidopsis	root vs. shoot	AT5G18730	1.5392	0.00012328	0.00863861	0.0923413	229.502	11.2792
Arabidopsis	root vs. shoot	AT4G11460	0.0874084	0.000124133	0.00866967	13.6679	2.3731	-2.52595
Arabidopsis	root vs. shoot	AT5G66631	0.594956	0.000125297	0.00872214	3.96421	157.333	5.31064
Arabidopsis	root vs. shoot	AT3G50820	0.0246345	0.000126405	0.00874557	7.44311	3.67763	-1.01713
Arabidopsis	root vs. shoot	AT2G20030	0.0744172	0.00012646	0.00874557	4.95551	0.351899	-3.8158
Arabidopsis	root vs. shoot	AT2G41940	0.378219	0.000127795	0.00880913	38.4676	5.7833	-2.73368
Arabidopsis	root vs. shoot	AT1G20810	0.056216	0.000128449	0.00882547	0.978635	3.27702	1.74354
Arabidopsis	root vs. shoot	AT2G01755	0.0962364	0.000129101	0.00884154	0.392792	3.52677	3.16651
Arabidopsis	root vs. shoot	AT1G26515	0.166812	0.000130781	0.00892004	654.308	97.9377	-2.74003
Arabidopsis	root vs. shoot	AT1G01420	0.0610858	0.00013109	0.00892004	1.48579	4.76019	1.67979
Arabidopsis	root vs. shoot	AT5G46490	0.247294	0.000131737	0.00893531	0.0915452	3.81012	5.37921
Arabidopsis	root vs. shoot	AT5G58610	0.519503	0.000143126	0.00967679	0.567313	19.286	5.08726
Arabidopsis	root vs. shoot	AT1G55550	0.142653	0.000145616	0.0098138	0.657852	4.05363	2.62338
Arabidopsis	root vs. shoot	AT3G48010	0.548054	0.000147064	0.00987992	12.7168	241.677	4.24827
Arabidopsis	root vs. shoot	AT4G27980	0.568119	0.00014919	0.00999104	0.129385	16.1812	6.96651
Arabidopsis	root vs. shoot	AT4G11900	0.447133	0.000154993	0.0103469	18.4025	2.31827	-2.98879
Arabidopsis	root vs. shoot	AT1G46912	1.20984	0.000159311	0.0106017	49.2598	0.0734167	-9.39009
Arabidopsis	root vs. shoot	AT1G11630	0.629525	0.000162173	0.0107584	3.47931	140.543	5.33607
Arabidopsis	root vs. shoot	AT4G19530	0.107322	0.000163819	0.0108336	18.1457	3.66696	-2.30697
Arabidopsis	root vs. shoot	AT1G19310	0.444367	0.000167701	0.0110557	2.00751	43.5798	4.44018
Arabidopsis	root vs. shoot	AT5G39210	0.439489	0.000170991	0.0112376	176.193	4.12246	-5.41751
Arabidopsis	root vs. shoot	AT2G32650	0.225349	0.000173539	0.0113697	0.0418497	1.33609	4.99665
Arabidopsis	root vs. shoot	AT3G57760	1.04319	0.000179459	0.0117213	7.84676	0.0357158	-7.77939
Arabidopsis	root vs. shoot	AT3G59400	0.0203051	0.000183389	0.0119411	11.6006	5.94832	-0.96365
Arabidopsis	root vs. shoot	AT2G46860	0.0256576	0.000189299	0.0122832	4.9186	21.18	2.10638
Arabidopsis	root vs. shoot	AT2G24520	0.106021	0.000189803	0.0122832	10.9761	2.55514	-2.10289
Arabidopsis	root vs. shoot	AT3G51680	0.279036	0.000193251	0.0124682	9.87915	85.4169	3.11206
Arabidopsis	root vs. shoot	AT2G31830	0.82737	0.000195116	0.0125503	1.21608	97.1247	6.31953
Arabidopsis	root vs. shoot	AT1G47610	0.631338	0.000216568	0.0138879	4.70111	217.761	5.5336
Arabidopsis	root vs. shoot	AT3G44020	0.140627	0.000217974	0.0139359	0.238812	1.87114	2.96997
Arabidopsis	root vs. shoot	AT1G64770	0.110825	0.000222574	0.0141477	28.6976	5.70166	-2.33148
Arabidopsis	root vs. shoot	AT5G44660	0.387973	0.000222625	0.0141477	2.72171	0.145807	-4.22238
Arabidopsis	root vs. shoot	AT2G29110	0.747248	0.000223315	0.014149	2.67695	288.461	6.75165
Arabidopsis	root vs. shoot	AT5G41820	1.60164	0.000224682	0.0141932	23.1196	0.144549	-7.32141
Arabidopsis	root vs. shoot	AT4G28840	0.155101	0.000228509	0.0142646	3.93463	0.336632	-3.54698
Arabidopsis	root vs. shoot	AT1G58220	0.253071	0.00022701	0.0142646	2.6629	24.3257	3.19141
Arabidopsis	root vs. shoot	AT2G41970	0.0546007	0.00022815	0.0142646	3.17596	0.693702	-2.19481
Arabidopsis	root vs. shoot	AT5G05290	0.210437	0.00022764	0.0142646	0.342413	2.94416	3.10405
Arabidopsis	root vs. shoot	AT1G52500	0.107677	0.000229423	0.0142796	2.78247	0.639402	-2.12157
Arabidopsis	root vs. shoot	AT2G21530	0.0367933	0.000233991	0.0144906	7.86393	3.04721	-1.36776
Arabidopsis	root vs. shoot	AT1G51370	0.609418	0.000234184	0.0144906	1.23461	42.9182	5.11946
Arabidopsis	root vs. shoot	AT1G71500	0.0191905	0.000235073	0.0145033	7.45267	3.9411	-0.919159
Arabidopsis	root vs. shoot	AT1G43160	0.0346853	0.000239329	0.0146958	3.30093	10.8049	1.71074
Arabidopsis	root vs. shoot	AT3G26960	0.314177	0.000239582	0.0146958	303.991	7.78892	-5.28646
Arabidopsis	root vs. shoot	AT4G01240	0.37804	0.000243424	0.0148882	1.34921	27.41	4.34451
Arabidopsis	root vs. shoot	AT3G45660	0.19705	0.000251639	0.0153463	5.5009	0.215848	-4.67158
Arabidopsis	root vs. shoot	AT5G38710	0.157568	0.000260678	0.0158519	3.78478	0.621425	-2.60656
Arabidopsis	root vs. shoot	AT5G39080	0.0597475	0.000266367	0.0161515	10.3498	3.34079	-1.63133
Arabidopsis	root vs. shoot	AT3G60270	1.79287	0.000278471	0.0168372	5.4861	0.0345598	-7.31054
Arabidopsis	root vs. shoot	AT1G15140	0.0143386	0.000291869	0.0175969	4.79245	8.21432	0.777377
Arabidopsis	root vs. shoot	AT3G22120	0.0195118	0.000294164	0.0176849	13.7405	7.1862	-0.935134
Arabidopsis	root vs. shoot	AT1G74710	0.0297967	0.000298792	0.0179123	3.10791	6.83159	1.13628
Arabidopsis	root vs. shoot	AT4G10060	0.049026	0.000303613	0.0181499	14.0602	5.02088	-1.48561
Arabidopsis	root vs. shoot	AT3G59250	0.412558	0.000308617	0.0182429	88.6043	1.7721	-5.64384
Arabidopsis	root vs. shoot	AT3G21180	0.061852	0.000308349	0.0182429	3.17763	11.5469	1.86148
Arabidopsis	root vs. shoot	AT5G45960	0.194579	0.000307556	0.0182429	0.769562	9.56155	3.63513
Arabidopsis	root vs. shoot	AT5G66830	0.390686	0.00030767	0.0182429	1.90923	33.4942	4.13285
Arabidopsis	root vs. shoot	AT2G20570	0.105461	0.000320737	0.0189065	6.33536	1.45702	-2.1204
Arabidopsis	root vs. shoot	AT4G28660	0.0265377	0.000324742	0.0190894	8.25637	3.98533	-1.05081
Arabidopsis	root vs. shoot	AT1G09560	0.0127797	0.000330032	0.0193466	4.22723	6.94428	0.716112
Arabidopsis	root vs. shoot	AT3G13020	0.507051	0.000331242	0.0193639	0.106217	3.65721	5.10566
Arabidopsis	root vs. shoot	AT2G34330	0.182675	0.00033649	0.0195626	4.54546	0.386638	-3.55537
Arabidopsis	root vs. shoot	AT2G45970	0.0400087	0.000335832	0.0195626	1.92358	4.61467	1.26243
Arabidopsis	root vs. shoot	AT4G37925	0.0707736	0.000344273	0.0199603	24.2155	6.36357	-1.92802
Arabidopsis	root vs. shoot	AT5G10990	0.132643	0.000347477	0.0199971	4.12221	27.3308	2.72904
Arabidopsis	root vs. shoot	AT4G17810	0.19606	0.000347511	0.0199971	49.4285	1.89905	-4.702
Arabidopsis	root vs. shoot	AT1G79180	0.185355	0.000347742	0.0199971	2.56822	0.136005	-4.23903
Arabidopsis	root vs. shoot	AT4G01760	1.46231	0.000348838	0.0200057	2.69562	244.57	6.50349
Arabidopsis	root vs. shoot	AT4G22280	0.677212	0.000351317	0.0200934	5.43276	0.114926	-5.56291
Arabidopsis	root vs. shoot	AT3G50760	0.467833	0.000354053	0.0201954	5.06127	102.243	4.33636
Arabidopsis	root vs. shoot	AT3G44970	0.0370297	0.000355329	0.0202136	6.60298	2.85494	-1.20966
Arabidopsis	root vs. shoot	AT5G23800	0.588935	0.000358438	0.0202506	6.61107	191.824	4.85876
Arabidopsis	root vs. shoot	AT2G23780	0.0495087	0.00035885	0.0202506	0.838581	2.18519	1.38174
Arabidopsis	root vs. shoot	AT1G15040	0.0612836	0.000358598	0.0202506	5.11491	1.6363	-1.64428
Arabidopsis	root vs. shoot	AT4G29905	0.0209566	0.00036066	0.0202987	6.59843	3.55139	-0.893736
Arabidopsis	root vs. shoot	AT4G24510	0.0468802	0.000364856	0.0204467	10.8895	4.252	-1.35673
Arabidopsis	root vs. shoot	AT1G69526	0.0981513	0.000365223	0.0204467	3.15118	0.641095	-2.29728
Arabidopsis	root vs. shoot	AT5G18860	0.0102991	0.000371015	0.0207161	3.37763	5.45239	0.690875
Arabidopsis	root vs. shoot	AT3G26230	0.382493	0.000378013	0.0209411	70.6544	2.44826	-4.85095
Arabidopsis	root vs. shoot	AT1G55370	0.313931	0.000377897	0.0209411	47.4756	2.60474	-4.18798
Arabidopsis	root vs. shoot	AT3G22210	0.0393393	0.000377028	0.0209411	8.18575	2.93278	-1.48085
Arabidopsis	root vs. shoot	AT5G59780	0.14238	0.000379012	0.0209417	0.773676	0.152769	-2.34038
Arabidopsis	root vs. shoot	AT1G29070	0.0333221	0.0003813	0.0210132	6.64571	3.05273	-1.12232
Arabidopsis	root vs. shoot	AT5G45200	0.473677	0.000387448	0.0212965	3.6063	107.866	4.90257
Arabidopsis	root vs. shoot	AT5G56860	0.0984415	0.000390143	0.0213891	12.9677	2.97544	-2.12375
Arabidopsis	root vs. shoot	AT1G76820	1.0405	0.000401838	0.0219734	376.922	1.71216	-7.78231
Arabidopsis	root vs. shoot	AT3G23790	0.0750518	0.000406366	0.0221637	1.88849	6.27488	1.73235
Arabidopsis	root vs. shoot	AT3G06210	0.13477	0.000409312	0.0222099	3.8967	0.815263	-2.25692
Arabidopsis	root vs. shoot	AT1G04350	0.0362641	0.000409134	0.0222099	6.06538	2.68318	-1.17665
Arabidopsis	root vs. shoot	AT5G43210	0.42714	0.000413013	0.0223534	10.4175	0.553899	-4.23324
Arabidopsis	root vs. shoot	AT1G30380	0.0186401	0.000414372	0.0223697	8.97162	5.08984	-0.817749
Arabidopsis	root vs. shoot	AT1G04620	0.0671342	0.000420203	0.0226268	20.1246	5.42718	-1.89068
Arabidopsis	root vs. shoot	AT3G52360	0.39158	0.000423393	0.0227407	1.98986	27.9905	3.8142
Arabidopsis	root vs. shoot	AT2G35000	0.0957507	0.000424682	0.0227522	2.03637	7.99273	1.97269
Arabidopsis	root vs. shoot	AT2G42060	0.13106	0.000425805	0.0227548	2.22436	19.3065	3.11763
Arabidopsis	root vs. shoot	AT5G03180	0.454588	0.000437565	0.0233243	1.88065	33.1367	4.13913
Arabidopsis	root vs. shoot	AT2G04050	0.187139	0.000443632	0.0235883	22.9663	3.2025	-2.84225
Arabidopsis	root vs. shoot	AT3G55760	0.0236676	0.000445233	0.0236141	5.94896	11.953	1.00667
Arabidopsis	root vs. shoot	AT3G08520	0.0199153	0.000447171	0.0236576	6.94699	3.8502	-0.851454
Arabidopsis	root vs. shoot	AT1G17810	0.411923	0.000451581	0.0238313	71.4065	12.0547	-2.56646
Arabidopsis	root vs. shoot	AT1G74670	0.10626	0.000458127	0.0241167	25.1477	4.45915	-2.49559
Arabidopsis	root vs. shoot	AT5G01930	0.111922	0.000468926	0.0245434	3.08895	0.753185	-2.03604
Arabidopsis	root vs. shoot	AT2G31020	0.0367359	0.000467687	0.0245434	2.4281	6.04375	1.31561
Arabidopsis	root vs. shoot	AT1G05140	0.0320019	0.000469713	0.0245434	1.50565	3.32752	1.14406
Arabidopsis	root vs. shoot	AT5G01490	0.0659188	0.000472234	0.0246136	4.63873	0.312854	-3.89017
Arabidopsis	root vs. shoot	AT3G27030	0.0485027	0.000473382	0.0246136	2.5193	6.59825	1.38906
Arabidopsis	root vs. shoot	AT5G14910	0.0201438	0.000475051	0.0246398	8.6761	4.50356	-0.945981
Arabidopsis	root vs. shoot	AT5G20220	0.146246	0.000486172	0.0251549	0.366352	2.20093	2.58681
Arabidopsis	root vs. shoot	AT3G05730	0.185218	0.000488831	0.0252308	88.0145	7.2435	-3.60298
Arabidopsis	root vs. shoot	AT4G11650	0.119553	0.000490972	0.0252797	3.80865	0.804208	-2.24364
Arabidopsis	root vs. shoot	AT1G52510	0.0338452	0.000507691	0.0260771	1.64064	3.89977	1.24913
Arabidopsis	root vs. shoot	AT3G28580	0.539999	0.000513187	0.0262956	26.0682	0.931996	-4.80582
Arabidopsis	root vs. shoot	AT1G64710	0.0305929	0.000519755	0.0265575	9.56654	4.06751	-1.23385
Arabidopsis	root vs. shoot	AT4G12970	0.194836	0.000520809	0.0265575	8.59748	2.61717	-1.71591
Arabidopsis	root vs. shoot	AT1G45545	0.0742457	0.000522453	0.0265773	5.10524	1.59445	-1.67892
Arabidopsis	root vs. shoot	AT3G47110	0.279177	0.000528559	0.0268234	2.76468	0.236501	-3.54719
Arabidopsis	root vs. shoot	AT5G67610	0.0468109	0.000540289	0.0273531	3.35661	1.33279	-1.33256
Arabidopsis	root vs. shoot	AT2G33050	0.0561353	0.000559096	0.0281166	2.0698	5.59324	1.43419
Arabidopsis	root vs. shoot	AT1G63550	1.70643	0.000558471	0.0281166	0.185599	184.326	9.95585
Arabidopsis	root vs. shoot	AT4G39110	0.538027	0.000559356	0.0281166	0.174248	6.76259	5.27837
Arabidopsis	root vs. shoot	AT2G14910	0.0258979	0.00056228	0.0281966	1.73477	3.35075	0.949742
Arabidopsis	root vs. shoot	AT3G18450	0.100064	0.000567884	0.0284103	6.52876	0.169905	-5.26401
Arabidopsis	root vs. shoot	AT2G28570	0.897133	0.000573219	0.0285423	1.51126	0.0726454	-4.37873
Arabidopsis	root vs. shoot	AT5G28490	0.562119	0.000573191	0.0285423	0.143647	11.2249	6.28804
Arabidopsis	root vs. shoot	AT5G61520	0.124863	0.000574707	0.0285492	31.5442	4.93282	-2.67689
Arabidopsis	root vs. shoot	AT3G26140	0.772432	0.000582551	0.028871	0.186668	10.3219	5.78909
Arabidopsis	root vs. shoot	AT1G71790	0.0992148	0.00059089	0.0292159	2.18856	8.11728	1.89101
Arabidopsis	root vs. shoot	AT4G26480	0.0222065	0.000594158	0.0292578	1.73066	3.23221	0.901199
Arabidopsis	root vs. shoot	AT3G59530	0.819009	0.000594502	0.0292578	1.17499	64.1715	5.77122
Arabidopsis	root vs. shoot	AT1G68795	0.256404	0.000600147	0.0294671	1.48488	0.0680917	-4.44673
Arabidopsis	root vs. shoot	AT4G38410	0.425436	0.000609316	0.029848	3.8598	64.2263	4.05656
Arabidopsis	root vs. shoot	AT5G01340	0.0164811	0.000619353	0.0302505	3.00096	5.14207	0.776928
Arabidopsis	root vs. shoot	AT1G74590	0.0834849	0.00062039	0.0302505	5.57795	1.43667	-1.957
Arabidopsis	root vs. shoot	AT5G22300	0.0631994	0.000629738	0.0306357	7.7061	2.55306	-1.59377
Arabidopsis	root vs. shoot	AT3G08505	0.381001	0.000636031	0.0308709	2.61025	33.9435	3.70088
Arabidopsis	root vs. shoot	AT4G36770	0.326986	0.00064253	0.0311149	0.281104	4.59232	4.03005
Arabidopsis	root vs. shoot	AT1G29110	0.926469	0.000644566	0.0311422	40.3665	3.09084	-3.70709
Arabidopsis	root vs. shoot	AT2G38120	0.291629	0.000648308	0.0312517	3.2874	29.051	3.14357
Arabidopsis	root vs. shoot	AT3G07700	0.0186658	0.000651412	0.0312643	3.15128	5.57687	0.823518
Arabidopsis	root vs. shoot	AT2G44210	0.0184607	0.000651524	0.0312643	10.94	5.9189	-0.886213
Arabidopsis	root vs. shoot	AT4G23420	0.068587	0.000667083	0.0319385	3.49871	0.910615	-1.94191
Arabidopsis	root vs. shoot	AT5G55670	0.0387425	0.000674387	0.0322153	6.19718	14.1924	1.19543
Arabidopsis	root vs. shoot	AT2G27385	0.0664879	0.000684075	0.0326045	10.7584	3.50115	-1.61956
Arabidopsis	root vs. shoot	AT5G15340	0.618938	0.000699424	0.0332436	0.117219	6.57741	5.81024
Arabidopsis	root vs. shoot	AT1G32900	0.0292348	0.000700625	0.0332436	14.0251	6.67996	-1.0701
Arabidopsis	root vs. shoot	AT1G30080	0.645482	0.000705292	0.0333901	3.56835	102.984	4.85102
Arabidopsis	root vs. shoot	AT2G24090	0.0224581	0.000713982	0.0337261	9.4067	5.05305	-0.896533
Arabidopsis	root vs. shoot	AT5G66190	0.0152885	0.000731049	0.0344554	9.12201	5.49933	-0.730096
Arabidopsis	root vs. shoot	AT5G44580	0.0707188	0.000736595	0.0346396	7.3538	2.39736	-1.61704
Arabidopsis	root vs. shoot	AT1G35250	0.387632	0.000738323	0.0346439	1.52935	0.0647322	-4.5623
Arabidopsis	root vs. shoot	AT5G17220	0.0770514	0.000755604	0.0353763	12.3265	3.6615	-1.75125
Arabidopsis	root vs. shoot	AT1G49100	0.573935	0.000757885	0.0354048	4.77339	123.975	4.69889
Arabidopsis	root vs. shoot	AT2G47240	0.0705824	0.00075978	0.0354151	12.2126	3.85834	-1.66232
Arabidopsis	root vs. shoot	AT1G68790	0.0147879	0.000772135	0.0358332	3.39962	5.58274	0.715601
Arabidopsis	root vs. shoot	AT5G64905	0.246153	0.000770949	0.0358332	6.41211	0.409185	-3.96997
Arabidopsis	root vs. shoot	AT1G20310	0.924024	0.000778732	0.0360602	108.071	0.937373	-6.84913
Arabidopsis	root vs. shoot	AT3G55630	0.427419	0.000787388	0.0363814	11.651	0.76933	-3.9207
Arabidopsis	root vs. shoot	AT3G11120	0.0176427	0.000795449	0.0366739	10.813	6.33952	-0.770326
Arabidopsis	root vs. shoot	AT5G39970	0.0285598	0.000799207	0.036767	2.67147	1.28981	-1.05048
Arabidopsis	root vs. shoot	AT1G55010	0.912753	0.000801333	0.0367848	56.347	4.03237	-3.80464
Arabidopsis	root vs. shoot	AT1G56510	0.208576	0.000815177	0.0371784	14.4705	1.67138	-3.11401
Arabidopsis	root vs. shoot	AT3G13435	0.0629917	0.000814972	0.0371784	1.91348	0.145693	-3.71519
Arabidopsis	root vs. shoot	AT1G49710	0.324539	0.000814607	0.0371784	3.27872	31.72	3.27419
Arabidopsis	root vs. shoot	AT4G33530	0.0123313	0.000821563	0.037346	2.7287	1.74785	-0.642634
Arabidopsis	root vs. shoot	AT1G34047	0.0668122	0.000822381	0.037346	4.58239	0.408437	-3.48792
Arabidopsis	root vs. shoot	AT3G21760	0.0894187	0.000830505	0.0375687	10.6761	2.84728	-1.90672
Arabidopsis	root vs. shoot	AT3G06460	0.152579	0.000830836	0.0375687	7.39848	31.2438	2.07827
Arabidopsis	root vs. shoot	AT4G03140	0.259217	0.000834454	0.0375717	2.32171	0.296729	-2.96797
Arabidopsis	root vs. shoot	AT1G71380	0.807845	0.000833684	0.0375717	4.32902	260.208	5.90948
Arabidopsis	root vs. shoot	AT1G75690	0.0804774	0.000840131	0.037747	12.036	3.61849	-1.73389
Arabidopsis	root vs. shoot	AT4G14390	0.152449	0.00085386	0.0379444	2.97971	0.284774	-3.38728
Arabidopsis	root vs. shoot	AT5G42390	0.00891427	0.000853549	0.0379444	3.24238	4.6945	0.533918
Arabidopsis	root vs. shoot	AT3G53240	0.141624	0.000848296	0.0379444	1.62112	0.345452	-2.23044
Arabidopsis	root vs. shoot	AT5G38100	0.10707	0.000855281	0.0379444	3.28579	0.724708	-2.18077
Arabidopsis	root vs. shoot	AT3G52720	0.0201277	0.000852818	0.0379444	9.22695	4.78278	-0.948005
Arabidopsis	root vs. shoot	AT1G55175	1.41085	0.000852696	0.0379444	7.29836	0.147201	-5.63171
Arabidopsis	root vs. shoot	AT2G17975	0.155141	0.000857379	0.0379578	2.24262	0.449489	-2.31883
Arabidopsis	root vs. shoot	AT3G24515	0.411094	0.000860301	0.0380077	3.59959	47.6591	3.72685
Arabidopsis	root vs. shoot	AT1G31410	0.0508058	0.000871067	0.0384031	1.5898	3.98194	1.32462
Arabidopsis	root vs. shoot	AT3G46340	0.384355	0.000874257	0.0384637	1.46173	38.2661	4.71032
Arabidopsis	root vs. shoot	AT2G39570	0.0452417	0.000887583	0.0387279	1.50349	3.49342	1.21632
Arabidopsis	root vs. shoot	AT4G19060	0.296882	0.000887523	0.0387279	4.84463	0.50112	-3.27316
Arabidopsis	root vs. shoot	AT1G14560	0.102617	0.000882608	0.0387279	0.497225	1.82086	1.87265
Arabidopsis	root vs. shoot	AT5G02140	0.386703	0.000884061	0.0387279	2.30648	29.618	3.68271
Arabidopsis	root vs. shoot	AT4G16600	0.197968	0.00090385	0.0393565	2.55913	24.3769	3.25179
Arabidopsis	root vs. shoot	AT1G14480	0.580377	0.00091225	0.0396407	2.16529	0.059611	-5.18284
Arabidopsis	root vs. shoot	AT3G16210	0.27021	0.000922464	0.0400024	3.01809	0.227775	-3.72796
Arabidopsis	root vs. shoot	AT5G10120	0.206878	0.000951279	0.0411676	0.15077	1.90084	3.65622
Arabidopsis	root vs. shoot	AT4G15440	0.478009	0.000966397	0.0417365	28.2514	1.17406	-4.58875
Arabidopsis	root vs. shoot	AT1G66980	0.125998	0.000971149	0.0418563	12.1203	2.53479	-2.25749
Arabidopsis	root vs. shoot	AT2G16230	0.531801	0.000999217	0.0429785	3.64415	34.344	3.2364
Arabidopsis	root vs. shoot	AT2G30760	1.20112	0.00100552	0.0431617	5.98188	0.0510188	-6.87343
Arabidopsis	root vs. shoot	AT3G56500	0.423982	0.00101467	0.0434667	5.87737	0.0906959	-6.01799
Arabidopsis	root vs. shoot	AT3G44770	0.803588	0.00102306	0.0437373	0.08274	7.91049	6.57904
Arabidopsis	root vs. shoot	AT5G01320	1.10429	0.00102644	0.0437934	9.32379	0.0532616	-7.45168
Arabidopsis	root vs. shoot	AT3G25410	0.0327223	0.00102858	0.0437963	2.10182	4.44178	1.0795
Arabidopsis	root vs. shoot	AT5G47610	0.151535	0.00103664	0.0440511	58.229	4.98884	-3.54496
Arabidopsis	root vs. shoot	AT2G37660	0.0151172	0.00104025	0.0441158	7.28122	4.39921	-0.726934
Arabidopsis	root vs. shoot	AT4G00550	0.0586754	0.00106773	0.0451907	2.055	0.779749	-1.39806
Arabidopsis	root vs. shoot	AT2G26310	0.366441	0.00107238	0.0452259	2.05324	22.5278	3.45573
Arabidopsis	root vs. shoot	AT4G15563	0.506405	0.00107284	0.0452259	0.621229	0.0819148	-2.92293
Arabidopsis	root vs. shoot	AT3G53450	0.759832	0.00107885	0.0453891	4.81847	0.0412333	-6.86862
Arabidopsis	root vs. shoot	AT1G53130	1.15263	0.00109327	0.0459044	4.3705	787.685	7.49368
Arabidopsis	root vs. shoot	AT4G14150	0.220467	0.00110885	0.0464662	2.23471	13.6874	2.6147
Arabidopsis	root vs. shoot	AT1G14300	0.309127	0.00112142	0.0467581	3.39391	29.2671	3.10826
Arabidopsis	root vs. shoot	AT1G07940	0.0143438	0.00112244	0.0467581	6.91373	4.3631	-0.664111
Arabidopsis	root vs. shoot	AT1G73350	0.0402121	0.00112219	0.0467581	5.0746	2.24671	-1.17548
Arabidopsis	root vs. shoot	AT3G58190	0.197347	0.00112967	0.0469438	2.48794	34.7673	3.8047
Arabidopsis	root vs. shoot	AT1G51470	0.0238493	0.00113134	0.0469438	3.28792	8.84851	1.42826
Arabidopsis	root vs. shoot	AT3G17350	0.52648	0.00113508	0.047007	3.81435	66.354	4.12068
Arabidopsis	root vs. shoot	AT4G17470	0.0721907	0.00114472	0.0473137	14.6193	4.19176	-1.80224
Arabidopsis	root vs. shoot	AT1G68590	0.0202107	0.00115142	0.0474977	10.5976	5.66507	-0.903577
Arabidopsis	root vs. shoot	AT2G19410	0.322318	0.0011571	0.0476393	2.28074	0.250027	-3.18935
Arabidopsis	root vs. shoot	AT1G01880	0.0978891	0.00116161	0.0476544	37.0822	10.1243	-1.8729
Arabidopsis	root vs. shoot	AT5G25040	0.35738	0.00116197	0.0476544	41.91	2.51577	-4.05823
Arabidopsis	root vs. shoot	AT4G17600	0.0173159	0.00116622	0.0477362	13.5247	7.17525	-0.914491
Arabidopsis	root vs. shoot	AT1G74730	0.0464518	0.00117577	0.048034	8.59457	3.64166	-1.23883
Arabidopsis	root vs. shoot	AT5G66816	0.11165	0.00117824	0.0480424	9.08773	0.888508	-3.35446
Arabidopsis	root vs. shoot	AT2G15370	0.0513929	0.00119679	0.0485182	3.94909	17.3552	2.13578
Arabidopsis	root vs. shoot	AT1G64700	0.509168	0.00119388	0.0485182	3.22329	58.4441	4.18045
Arabidopsis	root vs. shoot	AT1G74880	0.148864	0.0011953	0.0485182	16.223	2.93486	-2.46667
Arabidopsis	root vs. shoot	AT3G56360	0.0264817	0.00120601	0.0487986	4.58449	8.6264	0.911996
Arabidopsis	root vs. shoot	AT3G01490	0.135062	0.00121612	0.0490415	10.9563	2.42075	-2.17823
Arabidopsis	root vs. shoot	AT5G14870	1.29621	0.00121665	0.0490415	0.23016	30.9578	7.07152
Arabidopsis	root vs. shoot	AT3G19430	0.131545	0.00122387	0.0492386	4.85527	20.9254	2.10763
Arabidopsis	root vs. shoot	AT1G79540	0.26017	0.00122883	0.0492508	1.13426	8.03427	2.82441
Arabidopsis	root vs. shoot	AT2G31840	0.0678528	0.0012275	0.0492508	2.21606	6.41609	1.5337
Arabidopsis	root vs. shoot	AT1G01390	0.0619191	0.00123824	0.0495343	1.26948	6.11276	2.26758
Arabidopsis	root vs. shoot	AT1G28280	0.0216098	0.0012551	0.0501139	3.61496	6.51839	0.850536
Arabidopsis	root vs. shoot	AT1G69523	0.169612	0.00126163	0.0501853	0.214503	3.00071	3.80624
Arabidopsis	root vs. shoot	AT1G46768	0.763242	0.00125957	0.0501853	0.837149	28.6894	5.09889
Arabidopsis	root vs. shoot	AT1G62240	1.53561	0.00128981	0.0511726	19.3105	0.285522	-6.07964
Arabidopsis	root vs. shoot	AT1G54217	0.546919	0.00129129	0.0511726	3.6117	0.266051	-3.7629
Arabidopsis	root vs. shoot	AT5G53588	0.452074	0.00132343	0.0521593	0.700428	12.4573	4.15261
Arabidopsis	root vs. shoot	AT3G16260	0.0529048	0.00132358	0.0521593	1.33073	3.20191	1.26672
Arabidopsis	root vs. shoot	AT1G52570	0.618087	0.00132324	0.0521593	5.86697	0.203381	-4.85036
Arabidopsis	root vs. shoot	AT4G18830	0.692683	0.0013303	0.0523118	0.243148	2.63211	3.43632
Arabidopsis	root vs. shoot	AT3G45820	1.43749	0.00133239	0.0523118	0.105392	3.22801	4.93681
Arabidopsis	root vs. shoot	AT2G46260	0.217772	0.00133544	0.0523343	2.25819	13.1623	2.54317
Arabidopsis	root vs. shoot	AT1G78450	0.439509	0.00136021	0.0532067	12.2105	0.763392	-3.99955
Arabidopsis	root vs. shoot	AT5G18980	0.0488509	0.00137066	0.0535134	3.41139	1.44566	-1.23863
Arabidopsis	root vs. shoot	AT2G24700	0.20401	0.00137311	0.0535134	38.6582	5.98187	-2.69211
Arabidopsis	root vs. shoot	AT5G19370	0.0441968	0.00137845	0.0536228	14.1976	6.42573	-1.14371
Arabidopsis	root vs. shoot	AT3G62920	0.169772	0.00138697	0.0538553	6.15041	1.19688	-2.3614
Arabidopsis	root vs. shoot	AT3G48200	0.0954442	0.00139856	0.0540293	8.01033	2.43933	-1.71538
Arabidopsis	root vs. shoot	AT1G32120	0.284058	0.00139911	0.0540293	1.81604	13.6739	2.91256
Arabidopsis	root vs. shoot	AT3G21530	0.452673	0.00139492	0.0540293	3.0885	41.1527	3.73601
Arabidopsis	root vs. shoot	AT4G30230	0.554136	0.00141664	0.0546063	0.0751385	2.55392	5.08701
Arabidopsis	root vs. shoot	AT3G45080	0.0488897	0.00143292	0.0550335	4.70671	0.497438	-3.24213
Arabidopsis	root vs. shoot	AT1G23540	0.657967	0.0014324	0.0550335	2.34052	59.9402	4.67862
Arabidopsis	root vs. shoot	AT3G26115	0.224363	0.0014699	0.0563516	0.551058	3.6184	2.71508
Arabidopsis	root vs. shoot	AT5G62140	0.0494012	0.00148764	0.0569284	1.53862	4.24769	1.46504
Arabidopsis	root vs. shoot	AT5G53250	0.0716433	0.00149628	0.0571555	1.3802	0.403129	-1.77557
Arabidopsis	root vs. shoot	AT1G05894	0.495965	0.00150283	0.0573025	2.19589	0.233041	-3.23615
Arabidopsis	root vs. shoot	AT4G30825	0.0202915	0.00154266	0.0587152	5.74304	3.27828	-0.808877
Arabidopsis	root vs. shoot	AT3G44870	0.225742	0.00157142	0.0597028	10.8415	0.165573	-6.03296
Arabidopsis	root vs. shoot	AT3G15250	0.499357	0.00157463	0.0597173	1.53599	65.8734	5.42245
Arabidopsis	root vs. shoot	AT4G27400	0.0915255	0.0015787	0.0597648	4.57384	0.981155	-2.22085
Arabidopsis	root vs. shoot	AT3G05390	0.132756	0.00158897	0.060046	3.36581	0.596879	-2.49544
Arabidopsis	root vs. shoot	AT2G20725	0.11357	0.00159391	0.0601255	0.273461	1.04079	1.92827
Arabidopsis	root vs. shoot	AT3G11090	0.127887	0.00159825	0.0601819	11.9352	2.21395	-2.43054
Arabidopsis	root vs. shoot	AT3G16380	1.45767	0.00161467	0.0606921	226.77	1.05407	-7.74912
Arabidopsis	root vs. shoot	AT2G14890	0.0213354	0.00162726	0.0610569	4.86288	8.36429	0.782432
Arabidopsis	root vs. shoot	AT5G58140	0.0390518	0.00163151	0.0611079	5.94296	2.82695	-1.07193
Arabidopsis	root vs. shoot	AT2G32340	0.559939	0.00164481	0.061389	0.0526911	1.42379	4.75604
Arabidopsis	root vs. shoot	AT4G27657	0.763	0.00164254	0.061389	0.260974	3.02486	3.53489
Arabidopsis	root vs. shoot	AT4G36515	0.0874521	0.00165431	0.0615534	14.9445	4.23596	-1.81885
Arabidopsis	root vs. shoot	AT5G26250	1.86046	0.00165598	0.0615534	0.0732025	31.8254	8.76407
Arabidopsis	root vs. shoot	AT5G41390	0.611246	0.00165794	0.0615534	2.01741	42.9929	4.41352
Arabidopsis	root vs. shoot	AT1G77210	0.406686	0.00167104	0.0618338	117.241	4.81809	-4.60487
Arabidopsis	root vs. shoot	AT1G32950	0.129374	0.00167134	0.0618338	2.44511	0.283258	-3.10971
Arabidopsis	root vs. shoot	AT1G63980	0.0166049	0.00167996	0.0620443	2.87987	4.68434	0.701841
Arabidopsis	root vs. shoot	AT5G14470	0.473493	0.0017489	0.064354	0.326243	7.03712	4.43097
Arabidopsis	root vs. shoot	AT3G48420	0.0560077	0.00175783	0.064354	15.7492	5.97869	-1.39738
Arabidopsis	root vs. shoot	AT5G26330	0.0749957	0.00175612	0.064354	4.58457	14.144	1.62533
Arabidopsis	root vs. shoot	AT1G78320	0.25312	0.00174847	0.064354	5.94304	0.744074	-2.99768
Arabidopsis	root vs. shoot	AT3G54830	0.0854179	0.00176018	0.064354	8.83076	2.759	-1.67839
Arabidopsis	root vs. shoot	AT5G11630	0.0692253	0.00176075	0.064354	7.06735	2.56571	-1.46181
Arabidopsis	root vs. shoot	AT3G20120	0.0477766	0.00177606	0.0648018	5.14654	2.24446	-1.19723
Arabidopsis	root vs. shoot	AT1G80660	0.0328552	0.0017798	0.0648266	19.1971	9.02018	-1.08966
Arabidopsis	root vs. shoot	AT2G19060	0.299433	0.00178342	0.0648468	2.58606	0.313957	-3.04212
Arabidopsis	root vs. shoot	AT3G58480	1.29636	0.00180391	0.0653669	17.0554	1.10015	-3.95446
Arabidopsis	root vs. shoot	AT2G17870	0.0384728	0.00180235	0.0653669	4.07635	8.77704	1.10646
Arabidopsis	root vs. shoot	AT5G09820	0.0396358	0.00182786	0.0661218	4.8345	2.19193	-1.14116
Arabidopsis	root vs. shoot	AT5G60490	0.0869123	0.00185434	0.0669653	3.95706	12.7034	1.68272
Arabidopsis	root vs. shoot	AT3G17600	0.309121	0.00190174	0.0685599	1.75742	0.274357	-2.67933
Arabidopsis	root vs. shoot	AT3G30350	0.248043	0.001913	0.0687415	4.2763	0.106228	-5.33113
Arabidopsis	root vs. shoot	AT3G59290	0.230947	0.00191328	0.0687415	2.29011	13.317	2.53978
Arabidopsis	root vs. shoot	AT5G19560	0.088621	0.00192085	0.0687877	5.39244	1.08168	-2.31766
Arabidopsis	root vs. shoot	AT4G17090	0.0998093	0.00192106	0.0687877	27.4422	7.64272	-1.84424
Arabidopsis	root vs. shoot	AT5G44920	0.0696336	0.00196881	0.0703783	3.20078	1.13763	-1.49239
Arabidopsis	root vs. shoot	AT5G15310	0.269514	0.0019745	0.0704626	31.3145	3.29983	-3.24637
Arabidopsis	root vs. shoot	AT5G63520	0.0436593	0.00198192	0.0706083	6.86879	3.09597	-1.14967
Arabidopsis	root vs. shoot	AT3G63430	0.238217	0.00198786	0.070701	5.28735	31.8576	2.59102
Arabidopsis	root vs. shoot	AT4G00210	1.85849	0.00199252	0.070748	0.145666	8.29375	5.83129
Arabidopsis	root vs. shoot	AT3G55950	0.528707	0.0019991	0.0708625	1.74316	26.4819	3.92523
Arabidopsis	root vs. shoot	AT4G03205	0.22123	0.00200799	0.0709739	0.144511	0.995783	2.78465
Arabidopsis	root vs. shoot	AT3G15260	0.0451925	0.00200895	0.0709739	3.96973	1.79186	-1.14758
Arabidopsis	root vs. shoot	AT1G20290	0.949323	0.00202017	0.0712513	0.0383562	1.90333	5.63292
Arabidopsis	root vs. shoot	AT4G39530	0.578198	0.00202796	0.0714073	1.59238	27.682	4.11969
Arabidopsis	root vs. shoot	AT1G31470	0.580073	0.00206306	0.0725225	1.44018	24.9219	4.11309
Arabidopsis	root vs. shoot	AT1G68010	0.0365742	0.00209448	0.0735048	9.90602	4.93504	-1.00524
Arabidopsis	root vs. shoot	AT5G46130	0.584874	0.00212366	0.0744053	8.4606	0.120968	-6.12806
Arabidopsis	root vs. shoot	AT2G47860	0.435203	0.00214585	0.0750586	2.88191	32.7961	3.50843
Arabidopsis	root vs. shoot	AT1G72270	0.085452	0.00215162	0.0751363	95.1409	31.5645	-1.59176
Arabidopsis	root vs. shoot	AT1G71530	0.0821754	0.00216776	0.0755752	2.07562	0.684155	-1.60115
Arabidopsis	root vs. shoot	AT1G51402	0.582912	0.00217672	0.0757628	5.969	0.349053	-4.09597
Arabidopsis	root vs. shoot	AT4G03500	0.123057	0.00221525	0.076865	3.03749	0.786321	-1.94969
Arabidopsis	root vs. shoot	AT4G23990	0.0857259	0.00221565	0.076865	23.0415	5.48626	-2.07034
Arabidopsis	root vs. shoot	AT2G39350	0.30723	0.00222775	0.0770321	2.97584	22.5326	2.92065
Arabidopsis	root vs. shoot	AT3G47080	0.108345	0.0022277	0.0770321	2.54934	8.3623	1.71378
Arabidopsis	root vs. shoot	AT2G32530	0.131414	0.00225187	0.077739	13.3973	3.17686	-2.07627
Arabidopsis	root vs. shoot	AT3G18010	0.523174	0.00226448	0.0779204	114.501	3.96504	-4.85188
Arabidopsis	root vs. shoot	AT3G57440	0.408769	0.00226243	0.0779204	0.641257	11.8397	4.20659
Arabidopsis	root vs. shoot	AT4G03210	0.0106813	0.0022783	0.0782685	8.66652	5.88418	-0.558611
Arabidopsis	root vs. shoot	AT5G60270	0.0560106	0.00229066	0.0785654	3.49862	1.4609	-1.25993
Arabidopsis	root vs. shoot	AT1G16670	0.0728457	0.00231224	0.0791214	5.63073	1.98711	-1.50265
Arabidopsis	root vs. shoot	AT5G14730	0.0953182	0.00231434	0.0791214	4.86476	1.4636	-1.73285
Arabidopsis	root vs. shoot	AT5G51720	0.0329365	0.00232951	0.0795114	76.4796	7.7612	-3.30072
Arabidopsis	root vs. shoot	AT2G02930	0.0730446	0.00234318	0.0798494	7.39969	20.6297	1.47918
Arabidopsis	root vs. shoot	AT3G62790	0.0285211	0.00237612	0.0808416	5.84982	11.0429	0.916649
Arabidopsis	root vs. shoot	AT4G18470	0.484025	0.0023976	0.0813108	4.01152	51.5915	3.68491
Arabidopsis	root vs. shoot	AT3G50480	0.142561	0.00239611	0.0813108	0.384652	5.58514	3.85997
Arabidopsis	root vs. shoot	AT4G30097	1.77363	0.00240711	0.081503	0.0483561	1.46282	4.91891
Arabidopsis	root vs. shoot	AT3G46710	0.123227	0.00242263	0.0818973	3.98254	0.510095	-2.96485
Arabidopsis	root vs. shoot	AT5G24070	0.0849531	0.00243074	0.0819426	3.84965	0.466056	-3.04615
Arabidopsis	root vs. shoot	AT3G48510	1.33697	0.00243172	0.0819426	0.181011	26.3489	7.18553
Arabidopsis	root vs. shoot	AT5G58330	0.0178119	0.00244292	0.0820809	7.30726	4.50363	-0.698242
Arabidopsis	root vs. shoot	AT1G65490	0.0625202	0.00244358	0.0820809	8.95375	3.2207	-1.47512
Arabidopsis	root vs. shoot	AT5G53190	0.42535	0.0024667	0.0823349	4.02516	0.133466	-4.9145
Arabidopsis	root vs. shoot	AT5G58070	0.0165771	0.00246384	0.0823349	3.96408	2.48358	-0.674566
Arabidopsis	root vs. shoot	AT2G04570	0.0498196	0.00245909	0.0823349	9.76189	3.88085	-1.33079
Arabidopsis	root vs. shoot	AT5G41700	0.0167755	0.002458	0.0823349	2.61937	4.17813	0.673638
Arabidopsis	root vs. shoot	AT4G03230	0.534183	0.00247132	0.082359	1.90514	27.4164	3.84707
Arabidopsis	root vs. shoot	AT4G24250	0.421262	0.00250227	0.0831286	5.37973	0.444542	-3.59714
Arabidopsis	root vs. shoot	AT1G57700	0.334666	0.00250207	0.0831286	2.58834	20.6513	2.99614
Arabidopsis	root vs. shoot	AT3G10150	0.932706	0.00252318	0.0836921	0.506875	11.3101	4.47984
Arabidopsis	root vs. shoot	AT1G26870	1.23836	0.002558	0.0847141	0.917118	20.2713	4.46619
Arabidopsis	root vs. shoot	AT4G03480	0.29783	0.00256355	0.0847653	3.97462	18.1548	2.19146
Arabidopsis	root vs. shoot	AT1G04660	0.387103	0.00256759	0.0847667	0.450126	7.17753	3.99509
Arabidopsis	root vs. shoot	AT4G11470	2.71018	0.00257397	0.0848447	0.200092	38.3445	7.58221
Arabidopsis	root vs. shoot	AT3G05920	0.173958	0.00259536	0.0854167	3.58476	0.750571	-2.25582
Arabidopsis	root vs. shoot	AT5G13630	0.0148809	0.00262436	0.0861357	6.83384	4.46271	-0.614774
Arabidopsis	root vs. shoot	AT1G15990	1.95261	0.00262534	0.0861357	21.4734	0.0740546	-8.17975
Arabidopsis	root vs. shoot	AT2G44480	0.378098	0.00266021	0.0869775	2.30546	31.4753	3.7711
Arabidopsis	root vs. shoot	AT4G15350	0.216116	0.00266377	0.0869775	3.56075	0.369118	-3.27003
Arabidopsis	root vs. shoot	AT5G46060	0.309593	0.0026672	0.0869775	2.77946	0.385303	-2.85074
Arabidopsis	root vs. shoot	AT4G15850	0.0351816	0.00266744	0.0869775	5.93192	2.95725	-1.00424
Arabidopsis	root vs. shoot	AT4G34590	0.131943	0.00269903	0.0878722	1.31965	0.3521	-1.9061
Arabidopsis	root vs. shoot	AT5G11160	0.0687599	0.0027066	0.0878785	9.59294	3.40411	-1.49469
Arabidopsis	root vs. shoot	AT4G29170	0.245107	0.00270753	0.0878785	13.2773	2.17431	-2.61033
Arabidopsis	root vs. shoot	AT2G32550	0.204434	0.00271395	0.0879425	14.9723	2.43765	-2.61873
Arabidopsis	root vs. shoot	AT1G61300	0.392549	0.00272197	0.0879425	25.8802	1.8859	-3.77852
Arabidopsis	root vs. shoot	AT3G03850	0.41236	0.0027209	0.0879425	0.401594	2.88192	2.84322
Arabidopsis	root vs. shoot	AT2G38530	0.0300254	0.00272873	0.0880266	8.57836	4.66071	-0.880154
Arabidopsis	root vs. shoot	AT1G77850	0.0594117	0.00274461	0.088404	0.911911	2.22859	1.28917
Arabidopsis	root vs. shoot	AT3G16560	0.0253783	0.00275129	0.0884845	3.33519	1.88112	-0.826179
Arabidopsis	root vs. shoot	AT1G03410	0.132919	0.00276889	0.0889155	4.60039	1.07671	-2.09513
Arabidopsis	root vs. shoot	AT2G46720	1.13413	0.00281499	0.0902589	29.3058	3.29623	-3.1523
Arabidopsis	root vs. shoot	AT3G60620	0.0404217	0.00282768	0.0905285	1.8485	3.88143	1.07024
Arabidopsis	root vs. shoot	AT2G36120	0.0357349	0.00284141	0.0908308	7.05195	13.7197	0.960152
Arabidopsis	root vs. shoot	AT2G22290	0.14495	0.00284858	0.0909227	6.80422	1.33983	-2.34438
Arabidopsis	root vs. shoot	AT5G51470	0.370096	0.00287358	0.0915619	1.43837	40.2359	4.80597
Arabidopsis	root vs. shoot	AT1G51880	0.162943	0.00287726	0.0915619	2.52269	0.584173	-2.1105
Arabidopsis	root vs. shoot	AT3G05220	0.0196915	0.00289422	0.0919632	4.06728	6.73782	0.728216
Arabidopsis	root vs. shoot	AT1G26250	0.0425892	0.00293001	0.0929607	1.72367	3.65667	1.08505
Arabidopsis	root vs. shoot	AT5G01710	0.015765	0.00293623	0.0930186	1.86591	2.93858	0.655238
Arabidopsis	root vs. shoot	AT5G03390	0.287035	0.00294914	0.0932881	0.618966	4.68696	2.92072
Arabidopsis	root vs. shoot	AT4G09010	0.0511505	0.00295717	0.0934026	11.3041	4.67984	-1.27232
Arabidopsis	root vs. shoot	AT4G28460	0.344596	0.00296399	0.0934784	26.6223	0.33981	-6.29176
Arabidopsis	root vs. shoot	AT2G34620	0.0434427	0.00298605	0.0936159	13.0476	5.66789	-1.2029
Arabidopsis	root vs. shoot	AT1G78190	0.179212	0.0029793	0.0936159	3.74689	0.7979	-2.23141
Arabidopsis	root vs. shoot	AT2G28740	0.022494	0.00298449	0.0936159	8.75264	15.5619	0.830224
Arabidopsis	root vs. shoot	AT5G35770	0.944102	0.00298556	0.0936159	1.72517	80.1165	5.53728
Arabidopsis	root vs. shoot	AT3G27850	0.0384349	0.00303654	0.0949342	6.42676	3.15982	-1.02425
Arabidopsis	root vs. shoot	AT1G74088	1.56417	0.00304156	0.0949342	7.43867	0.23939	-4.95761
Arabidopsis	root vs. shoot	AT2G40100	0.131414	0.00304147	0.0949342	20.5221	5.59376	-1.87529
Arabidopsis	root vs. shoot	AT4G20160	0.266461	0.00304663	0.0949527	2.56923	20.3352	2.98457
Arabidopsis	root vs. shoot	AT3G23250	0.664521	0.00306586	0.0954115	2.6871	72.4343	4.75255
Arabidopsis	root vs. shoot	AT1G36180	0.127761	0.00307975	0.0957028	1.37466	4.85516	1.82045
Arabidopsis	root vs. shoot	AT5G54060	0.0567125	0.00309914	0.0961641	16.0848	6.07842	-1.40393
Arabidopsis	root vs. shoot	AT1G57565	2.02009	0.0031154	0.0963578	24.0265	0.297237	-6.33687
Arabidopsis	root vs. shoot	AT1G31650	0.331678	0.00311904	0.0963578	2.26029	17.0632	2.91631
Arabidopsis	root vs. shoot	AT4G12060	0.0260542	0.00311832	0.0963578	5.91692	10.5105	0.828913
Arabidopsis	root vs. shoot	AT3G29390	0.056949	0.0031237	0.0963612	2.09493	0.89349	-1.22938
Arabidopsis	root vs. shoot	AT5G22940	0.24842	0.00314277	0.0966676	2.48917	14.138	2.50584
Arabidopsis	root vs. shoot	AT4G37980	0.230735	0.00314152	0.0966676	35.819	4.55553	-2.97504
Arabidopsis	root vs. shoot	AT3G21580	0.256441	0.00314962	0.0967377	0.424195	2.60951	2.62098
Arabidopsis	root vs. shoot	AT3G63370	0.100083	0.00316133	0.0969336	1.04342	3.37159	1.69211
Arabidopsis	root vs. shoot	AT2G28970	0.733945	0.00316516	0.0969336	0.482287	15.9356	5.04622
Arabidopsis	root vs. shoot	AT2G03850	0.374231	0.00321347	0.0979876	0.733278	9.4124	3.68213
Arabidopsis	root vs. shoot	AT2G42600	0.011046	0.00320686	0.0979876	5.71475	3.97207	-0.524799
Arabidopsis	root vs. shoot	AT4G25470	1.15116	0.00320995	0.0979876	5.04888	0.256331	-4.29988
Arabidopsis	root vs. shoot	AT1G72820	0.0616205	0.00321818	0.09799	1.33292	3.31295	1.31352
Arabidopsis	root vs. shoot	AT3G24670	0.0407719	0.00322991	0.0980651	4.53058	2.17543	-1.0584
Arabidopsis	root vs. shoot	AT5G58260	0.280712	0.00322571	0.0980651	23.6463	3.23935	-2.86784
Arabidopsis	root vs. shoot	AT3G26445	0.535658	0.00324191	0.0981477	0.0292724	0.956188	5.02968
Arabidopsis	root vs. shoot	AT2G17590	0.364745	0.00323772	0.0981477	2.04452	50.6269	4.63007
Arabidopsis	root vs. shoot	AT4G32400	0.145528	0.00326582	0.0985133	2.60738	9.70981	1.89684
Arabidopsis	root vs. shoot	AT3G10060	0.0571012	0.00326795	0.0985133	13.1978	5.50569	-1.2613
Arabidopsis	root vs. shoot	AT3G16250	0.248424	0.00326081	0.0985133	20.7617	3.14069	-2.72477
Arabidopsis	root vs. shoot	AT2G26870	0.0722169	0.00327919	0.0987116	7.47445	2.76001	-1.4373
Arabidopsis	root vs. shoot	AT1G24140	0.290087	0.00328594	0.0987744	3.30564	0.211095	-3.96897
Arabidopsis	root vs. shoot	AT5G09640	0.56141	0.00329204	0.0988173	0.580842	24.8314	5.41788
Arabidopsis	root vs. shoot	AT2G39380	0.0905371	0.00331715	0.0994134	4.4047	1.46945	-1.58377
Arabidopsis	root vs. shoot	AT5G04895	0.0971938	0.00332129	0.0994134	0.69741	2.09964	1.59007
Arabidopsis	root vs. shoot	AT4G01750	0.0558845	0.0033599	0.100427	3.62916	9.46938	1.38363
Arabidopsis	root vs. shoot	AT5G51460	0.0203076	0.00336812	0.100531	5.37064	3.20638	-0.744149
Arabidopsis	root vs. shoot	AT1G08600	0.0215558	0.00342191	0.101992	3.01261	5.08359	0.754831
Arabidopsis	root vs. shoot	AT5G22700	1.4987	0.00343379	0.102202	0.19726	0.0104634	-4.23667
Arabidopsis	root vs. shoot	AT1G60930	0.405007	0.00344394	0.102217	0.75223	7.05113	3.22861
Arabidopsis	root vs. shoot	AT1G18835	1.67513	0.00343943	0.102217	0.0415898	8.01904	7.59106
Arabidopsis	root vs. shoot	AT3G50810	0.493487	0.00346225	0.102616	0.602406	0.0311931	-4.27144
Arabidopsis	root vs. shoot	AT4G19380	0.198909	0.00346732	0.102623	34.7956	6.21709	-2.48459
Arabidopsis	root vs. shoot	AT3G13430	0.0639577	0.00348136	0.102894	4.85339	1.9185	-1.33901
Arabidopsis	root vs. shoot	AT3G59040	0.0307752	0.00352594	0.104067	2.25864	4.26801	0.918111
Arabidopsis	root vs. shoot	AT4G34280	0.147737	0.00356085	0.104951	1.66473	6.26578	1.91221
Arabidopsis	root vs. shoot	AT5G66710	0.571043	0.00356755	0.105002	0.22643	4.33006	4.25725
Arabidopsis	root vs. shoot	AT1G51500	0.0181669	0.0035953	0.105457	4.3479	2.69668	-0.689135
Arabidopsis	root vs. shoot	AT2G23630	0.138914	0.0036079	0.105457	2.59127	14.3921	2.47354
Arabidopsis	root vs. shoot	AT4G13360	0.0159341	0.00359205	0.105457	3.32873	5.1841	0.639123
Arabidopsis	root vs. shoot	AT1G17100	0.0193673	0.00360792	0.105457	6.21996	3.7099	-0.745522
Arabidopsis	root vs. shoot	AT5G35110	0.911384	0.00360412	0.105457	4.08879	0.285887	-3.83816
Arabidopsis	root vs. shoot	AT5G06980	0.0255293	0.00363631	0.105994	5.36867	3.05898	-0.811516
Arabidopsis	root vs. shoot	AT3G15534	1.4006	0.00363396	0.105994	0.311544	6.85896	4.46048
Arabidopsis	root vs. shoot	AT5G17330	0.226909	0.00365377	0.10621	5.8218	29.4994	2.34115
Arabidopsis	root vs. shoot	AT1G05680	0.258978	0.00365231	0.10621	0.239808	5.87703	4.61514
Arabidopsis	root vs. shoot	AT3G14415	0.0164639	0.003662	0.106303	6.81123	4.37757	-0.637784
Arabidopsis	root vs. shoot	AT3G02760	0.0135982	0.00367933	0.10666	4.79522	7.15944	0.578251
Arabidopsis	root vs. shoot	AT2G26980	0.0206826	0.00369856	0.107071	4.72208	2.85809	-0.724369
Arabidopsis	root vs. shoot	AT1G26440	0.103107	0.00371995	0.107528	3.46606	1.1305	-1.61634
Arabidopsis	root vs. shoot	AT5G50260	0.358406	0.00372451	0.107528	15.3661	1.33307	-3.52692
Arabidopsis	root vs. shoot	AT3G55360	0.186002	0.0037404	0.10784	3.93317	16.9589	2.10828
Arabidopsis	root vs. shoot	AT5G51490	0.140623	0.00374891	0.107938	9.25621	44.5422	2.26668
Arabidopsis	root vs. shoot	AT5G15960	0.168328	0.0037562	0.108001	5.88882	1.40665	-2.06572
Arabidopsis	root vs. shoot	AT4G28850	0.0513055	0.00376371	0.10807	5.6776	13.6362	1.26409
Arabidopsis	root vs. shoot	AT1G66470	0.113857	0.00379272	0.108755	4.25421	18.0885	2.08811
Arabidopsis	root vs. shoot	AT2G47730	0.0115264	0.00384354	0.110064	5.06926	7.28682	0.523514
Arabidopsis	root vs. shoot	AT5G12480	0.0295326	0.0038572	0.110306	2.48348	4.52785	0.866464
Arabidopsis	root vs. shoot	AT1G75190	1.34964	0.00389199	0.110851	0.173516	27.9505	7.33166
Arabidopsis	root vs. shoot	AT2G46870	0.467743	0.00388679	0.110851	33.538	1.17667	-4.83301
Arabidopsis	root vs. shoot	AT5G42710	0.432362	0.00388839	0.110851	4.2724	42.1747	3.30326
Arabidopsis	root vs. shoot	AT5G45680	0.16821	0.00391218	0.111276	13.2352	2.86588	-2.20733
Arabidopsis	root vs. shoot	AT5G45770	0.276311	0.00394076	0.111939	117.676	13.4306	-3.13122
Arabidopsis	root vs. shoot	AT1G57570	0.146775	0.00399833	0.113422	2.74588	0.679072	-2.01563
Arabidopsis	root vs. shoot	AT3G53668	0.174797	0.00405336	0.114525	1.93049	0.4281	-2.17295
Arabidopsis	root vs. shoot	AT1G16380	0.794686	0.00404741	0.114525	0.466883	14.9532	5.00124
Arabidopsis	root vs. shoot	AT4G01550	0.4152	0.00405346	0.114525	3.27578	29.9746	3.19383
Arabidopsis	root vs. shoot	AT2G01880	0.0391804	0.00406371	0.114641	5.75697	12.7571	1.14792
Arabidopsis	root vs. shoot	AT4G02770	0.0190583	0.0040684	0.114641	12.7195	7.95638	-0.676862
Arabidopsis	root vs. shoot	AT5G61670	0.0237725	0.00407752	0.114745	1.88974	3.23894	0.777337
Arabidopsis	root vs. shoot	AT1G31920	0.204932	0.00410564	0.115265	7.61722	1.40811	-2.4355
Arabidopsis	root vs. shoot	AT1G68830	0.0379995	0.00410688	0.115265	2.07372	4.04182	0.962788
Arabidopsis	root vs. shoot	AT1G62630	0.361436	0.00414977	0.116161	32.2456	2.68492	-3.58615
Arabidopsis	root vs. shoot	AT4G24930	0.0414271	0.00414618	0.116161	13.6961	5.30168	-1.36924
Arabidopsis	root vs. shoot	AT2G43445	0.323538	0.0042061	0.117582	4.18456	0.570918	-2.87372
Arabidopsis	root vs. shoot	AT2G36790	0.818572	0.00421954	0.117802	9.05832	1.76205	-2.36199
Arabidopsis	root vs. shoot	AT5G40490	0.0211192	0.0042256	0.117816	3.95532	6.58973	0.736425
Arabidopsis	root vs. shoot	AT1G72030	0.221144	0.00425407	0.118399	6.7982	1.31639	-2.36856
Arabidopsis	root vs. shoot	AT4G02830	0.941118	0.00425772	0.118399	1.52139	57.2675	5.23426
Arabidopsis	root vs. shoot	AT5G49380	0.446062	0.00428234	0.118928	15.1728	1.34303	-3.49792
Arabidopsis	root vs. shoot	AT1G20470	0.514068	0.00428867	0.118947	0.137311	2.23296	4.02345
Arabidopsis	root vs. shoot	AT3G22235	2.33737	0.00430079	0.119127	0.0381142	1.50551	5.30378
Arabidopsis	root vs. shoot	AT4G38840	0.212606	0.00432128	0.119227	11.961	2.24865	-2.41121
Arabidopsis	root vs. shoot	AT2G29020	0.0187567	0.00431007	0.119227	5.95941	3.69995	-0.687665
Arabidopsis	root vs. shoot	AT5G18030	0.567317	0.00432053	0.119227	0.511245	5.30162	3.37435
Arabidopsis	root vs. shoot	AT1G09470	0.208861	0.00433117	0.119344	3.12919	15.053	2.26619
Arabidopsis	root vs. shoot	AT1G76010	0.020224	0.00436448	0.11995	4.5485	7.33326	0.689064
Arabidopsis	root vs. shoot	AT4G16980	0.0363652	0.00435992	0.11995	14.5328	7.51948	-0.950604
Arabidopsis	root vs. shoot	AT3G57130	0.314699	0.00438355	0.120317	1.35361	9.9994	2.88503
Arabidopsis	root vs. shoot	AT4G02450	0.0128822	0.00439169	0.120385	9.08817	13.3414	0.553845
Arabidopsis	root vs. shoot	AT1G36060	0.871647	0.00442557	0.121156	0.0670928	1.77971	4.72934
Arabidopsis	root vs. shoot	AT5G19090	0.0210477	0.00446753	0.121667	3.12347	5.1297	0.715724
Arabidopsis	root vs. shoot	AT1G18710	0.273311	0.00446102	0.121667	0.199415	2.62175	3.71668
Arabidopsis	root vs. shoot	AT4G39410	0.931387	0.00446832	0.121667	0.246164	10.3156	5.38907
Arabidopsis	root vs. shoot	AT1G65840	0.012747	0.00446582	0.121667	1.59747	1.08905	-0.552727
Arabidopsis	root vs. shoot	AT3G62110	0.0249007	0.00447295	0.121667	2.16981	3.74022	0.785553
Arabidopsis	root vs. shoot	AT2G45330	0.0279618	0.00449207	0.121717	5.24435	2.93045	-0.839641
Arabidopsis	root vs. shoot	AT4G23290	0.179562	0.00448974	0.121717	23.4899	2.96317	-2.98682
Arabidopsis	root vs. shoot	AT2G37360	0.0962511	0.00449182	0.121717	3.39412	1.1758	-1.52939
Arabidopsis	root vs. shoot	AT2G17972	0.105521	0.00453024	0.122594	23.1631	5.76329	-2.00686
Arabidopsis	root vs. shoot	AT1G76420	0.30462	0.00455244	0.123038	0.290962	2.52292	3.11619
Arabidopsis	root vs. shoot	AT5G46390	0.120139	0.00457801	0.123414	0.973341	3.43212	1.81808
Arabidopsis	root vs. shoot	AT5G49120	0.948099	0.004578	0.123414	8.20209	0.45713	-4.16531
Arabidopsis	root vs. shoot	AT5G41680	0.634848	0.00461952	0.124374	1.22868	0.0654741	-4.23004
Arabidopsis	root vs. shoot	AT1G28240	0.0310161	0.0046276	0.124434	1.75203	0.956852	-0.872661
Arabidopsis	root vs. shoot	AT1G08710	0.0931353	0.00464745	0.124651	8.07572	2.79077	-1.53293
Arabidopsis	root vs. shoot	AT4G25580	0.402835	0.00464642	0.124651	81.8018	6.57614	-3.63682
Arabidopsis	root vs. shoot	AT5G24430	0.110352	0.00466637	0.124863	2.39605	7.27336	1.60196
Arabidopsis	root vs. shoot	AT3G50570	0.207352	0.00466716	0.124863	47.6266	6.02754	-2.98213
Arabidopsis	root vs. shoot	AT5G07650	0.161846	0.00472601	0.126118	2.77351	14.3252	2.36877
Arabidopsis	root vs. shoot	AT1G68300	0.0141513	0.00472544	0.126118	5.34096	3.54018	-0.593276
Arabidopsis	root vs. shoot	AT3G61420	0.0349554	0.00478043	0.127211	1.56451	0.821907	-0.928665
Arabidopsis	root vs. shoot	AT4G02700	0.0449929	0.004785	0.127211	6.91831	3.26149	-1.08489
Arabidopsis	root vs. shoot	AT5G06230	0.139146	0.00477882	0.127211	2.15437	0.611043	-1.81792
Arabidopsis	root vs. shoot	AT4G24120	0.0364934	0.00481055	0.12741	12.0367	5.34387	-1.17149
Arabidopsis	root vs. shoot	AT5G02740	0.0191126	0.00479937	0.12741	2.91824	4.67619	0.680235
Arabidopsis	root vs. shoot	AT5G67030	0.010262	0.00480637	0.12741	4.96423	6.9771	0.491057
Arabidopsis	root vs. shoot	AT3G28070	0.361727	0.00485356	0.127909	75.5855	3.65281	-4.37103
Arabidopsis	root vs. shoot	AT4G20325	0.0638999	0.00484289	0.127909	5.23336	2.14919	-1.28395
Arabidopsis	root vs. shoot	AT2G37440	0.197787	0.00484044	0.127909	3.3349	0.662609	-2.33141
Arabidopsis	root vs. shoot	AT2G31190	0.0493044	0.00484814	0.127909	6.40205	2.95712	-1.11434
Arabidopsis	root vs. shoot	AT5G17520	0.260065	0.00487215	0.128175	2.51516	13.9008	2.46645
Arabidopsis	root vs. shoot	AT1G78170	0.0544166	0.00489075	0.128175	10.4977	4.20987	-1.31823
Arabidopsis	root vs. shoot	AT4G22010	0.0144252	0.00488877	0.128175	3.34539	4.97372	0.572153
Arabidopsis	root vs. shoot	AT2G43430	0.275693	0.00489392	0.128175	4.79057	27.3684	2.51424
Arabidopsis	root vs. shoot	AT2G03210	1.28889	0.00488461	0.128175	11.4586	766.047	6.06293
Arabidopsis	root vs. shoot	AT5G03860	0.0461016	0.00492126	0.128732	7.62123	3.75388	-1.02164
Arabidopsis	root vs. shoot	AT1G71695	0.0162734	0.00504065	0.131692	10.0114	6.47148	-0.62948
Arabidopsis	root vs. shoot	AT2G21290	0.0197621	0.00506968	0.132124	9.56627	5.80892	-0.719686
Arabidopsis	root vs. shoot	AT3G48185	1.3091	0.00506453	0.132124	0.0215039	1.52793	6.15084
Arabidopsis	root vs. shoot	AT4G36250	0.0187285	0.005076	0.132126	7.4913	4.70887	-0.669836
Arabidopsis	root vs. shoot	AT3G24030	0.182436	0.0051028	0.132631	3.23317	13.3457	2.04536
Arabidopsis	root vs. shoot	AT2G03420	0.252993	0.00510795	0.132631	68.761	8.61685	-2.99636
Arabidopsis	root vs. shoot	AT5G22800	0.0193282	0.00515602	0.133715	6.70308	4.11298	-0.704641
Arabidopsis	root vs. shoot	AT4G23300	0.411908	0.00518898	0.13391	155.94	8.99907	-4.11507
Arabidopsis	root vs. shoot	AT3G25920	0.0161053	0.00518279	0.13391	9.55397	6.18027	-0.62843
Arabidopsis	root vs. shoot	AT3G46920	0.0831645	0.00519528	0.13391	1.99024	5.23668	1.39571
Arabidopsis	root vs. shoot	AT2G29090	0.261983	0.0051884	0.13391	14.9114	2.30138	-2.69584
Arabidopsis	root vs. shoot	AT3G52310	0.921685	0.00520385	0.13391	25.195	4.43668	-2.50558
Arabidopsis	root vs. shoot	AT1G62620	1.54323	0.00520781	0.13391	0.0208116	2.94754	7.14598
Arabidopsis	root vs. shoot	AT1G53160	1.0787	0.00520441	0.13391	0.290896	3.24572	3.47996
Arabidopsis	root vs. shoot	AT3G30720	0.989851	0.00524381	0.134672	0.316785	3.19252	3.33312
Arabidopsis	root vs. shoot	AT2G26420	0.508253	0.00526103	0.13495	1.54748	18.7904	3.602
Arabidopsis	root vs. shoot	AT3G29030	0.0788432	0.00527264	0.135035	8.40631	3.02651	-1.47382
Arabidopsis	root vs. shoot	AT5G57200	0.329378	0.0052771	0.135035	3.03823	0.369118	-3.04107
Arabidopsis	root vs. shoot	AT4G29870	0.0234027	0.0053241	0.135909	2.81771	4.80883	0.77116
Arabidopsis	root vs. shoot	AT5G45950	0.0481518	0.00532058	0.135909	10.2805	4.9147	-1.06473
Arabidopsis	root vs. shoot	AT5G14850	0.295268	0.0053891	0.137113	2.64022	0.444743	-2.56961
Arabidopsis	root vs. shoot	AT3G16640	0.0136945	0.00539068	0.137113	4.25979	6.21564	0.545119
Arabidopsis	root vs. shoot	AT3G18870	0.334147	0.00538378	0.137113	0.376061	3.04368	3.01678
Arabidopsis	root vs. shoot	AT3G07530	0.45804	0.00544823	0.138332	5.00414	47.869	3.2579
Arabidopsis	root vs. shoot	AT1G49700	0.545777	0.00545169	0.138332	0.0668575	0.00578619	-3.5304
Arabidopsis	root vs. shoot	AT3G10020	0.0809456	0.00547841	0.138843	8.53176	23.3904	1.455
Arabidopsis	root vs. shoot	AT1G74970	0.0181444	0.00552875	0.139028	8.79057	5.55361	-0.662531
Arabidopsis	root vs. shoot	AT1G66220	1.0166	0.00551007	0.139028	17.2506	646.9	5.22883
Arabidopsis	root vs. shoot	AT2G37370	0.104907	0.00552578	0.139028	3.74205	0.902587	-2.05169
Arabidopsis	root vs. shoot	AT2G03760	0.0414459	0.00551898	0.139028	6.03333	3.06515	-0.976998
Arabidopsis	root vs. shoot	AT1G29440	0.775518	0.00553168	0.139028	16.1572	4.13254	-1.96708
Arabidopsis	root vs. shoot	AT3G50710	0.297213	0.00549381	0.139028	2.02669	0.187778	-3.43203
Arabidopsis	root vs. shoot	AT5G44870	0.0566725	0.00552039	0.139028	4.57795	2.02492	-1.17684
Arabidopsis	root vs. shoot	AT5G58310	0.867819	0.0055562	0.139406	0.43348	4.84985	3.4839
Arabidopsis	root vs. shoot	AT2G19210	0.248717	0.00555989	0.139406	2.77131	27.3714	3.30403
Arabidopsis	root vs. shoot	AT5G57690	0.831758	0.00561799	0.140696	44.6161	1.31059	-5.08928
Arabidopsis	root vs. shoot	AT3G13960	0.458921	0.0056314	0.140858	124.551	5.21548	-4.5778
Arabidopsis	root vs. shoot	AT1G14440	0.361547	0.00563779	0.140858	33.1736	3.90181	-3.08782
Arabidopsis	root vs. shoot	AT4G09820	0.331989	0.00565421	0.140917	16.585	2.27918	-2.8633
Arabidopsis	root vs. shoot	AT4G31320	0.0717324	0.00564961	0.140917	4.98915	0.94153	-2.40572
Arabidopsis	root vs. shoot	AT1G31690	0.573314	0.00566012	0.140917	134.159	4.53798	-4.88575
Arabidopsis	root vs. shoot	AT1G63680	0.0338903	0.00566943	0.140983	3.3135	6.0927	0.878725
Arabidopsis	root vs. shoot	AT4G12510	0.0454184	0.00576788	0.143263	2.48573	0.49641	-2.32406
Arabidopsis	root vs. shoot	AT5G38240	0.680486	0.00583117	0.143822	0.215158	6.68265	4.95695
Arabidopsis	root vs. shoot	AT3G58510	0.0188993	0.00583085	0.143822	4.31954	6.76818	0.647891
Arabidopsis	root vs. shoot	AT1G30040	0.138675	0.00582537	0.143822	11.6921	3.23495	-1.85371
Arabidopsis	root vs. shoot	AT2G37770	0.231284	0.00582749	0.143822	47.5205	5.31674	-3.15994
Arabidopsis	root vs. shoot	AT4G12270	0.318924	0.00581056	0.143822	2.48161	22.4956	3.18029
Arabidopsis	root vs. shoot	AT5G46090	0.460071	0.00581914	0.143822	3.57535	0.365086	-3.29178
Arabidopsis	root vs. shoot	AT1G16410	0.0415983	0.00584472	0.143988	6.82309	3.34222	-1.02962
Arabidopsis	root vs. shoot	AT4G36600	0.338521	0.0058588	0.144167	0.582232	8.99371	3.94925
Arabidopsis	root vs. shoot	AT4G13575	1.68237	0.0059692	0.146543	40.654	0.299178	-7.08625
Arabidopsis	root vs. shoot	AT5G23080	0.247141	0.00596437	0.146543	2.60877	13.0102	2.3182
Arabidopsis	root vs. shoot	AT5G13730	0.338193	0.00599341	0.146926	37.9634	4.13275	-3.19944
Arabidopsis	root vs. shoot	AT1G50720	0.157864	0.00600564	0.146926	10.7077	138.166	3.68968
Arabidopsis	root vs. shoot	AT3G01770	0.0660921	0.00600261	0.146926	0.684382	1.59134	1.21737
Arabidopsis	root vs. shoot	AT1G04880	0.505567	0.00604581	0.147393	0.168357	2.58841	3.94247
Arabidopsis	root vs. shoot	AT5G57580	0.0199891	0.00605258	0.147393	1.98235	3.18203	0.682734
Arabidopsis	root vs. shoot	AT5G20660	0.165712	0.00604535	0.147393	2.28554	8.43258	1.88344
Arabidopsis	root vs. shoot	AT5G59030	0.115058	0.00604027	0.147393	1.16082	3.70903	1.67589
Arabidopsis	root vs. shoot	AT3G05720	0.571554	0.00606593	0.147548	0.27345	6.59474	4.59197
Arabidopsis	root vs. shoot	AT4G01500	1.73478	0.0060735	0.147563	29.0609	2.37328	-3.61412
Arabidopsis	root vs. shoot	AT1G69340	0.0187489	0.00611526	0.148407	2.48407	1.5784	-0.654242
Arabidopsis	root vs. shoot	AT4G38220	0.0146319	0.0061297	0.148587	4.01055	5.94417	0.567676
Arabidopsis	root vs. shoot	AT1G07720	0.0415019	0.00617248	0.149453	10.3887	5.12176	-1.0203
Arabidopsis	root vs. shoot	AT3G58810	0.197122	0.00619397	0.149802	3.32252	0.606516	-2.45366
Arabidopsis	root vs. shoot	AT4G26630	0.00867119	0.00621102	0.149872	8.42957	11.4867	0.446438
Arabidopsis	root vs. shoot	AT4G16141	0.0373925	0.00620422	0.149872	6.49009	3.42794	-0.920898
Arabidopsis	root vs. shoot	AT5G57790	0.705531	0.00622899	0.149977	3.63169	0.202932	-4.16157
Arabidopsis	root vs. shoot	AT5G12110	0.0130471	0.00622954	0.149977	6.6498	4.55018	-0.547387
Arabidopsis	root vs. shoot	AT1G44608	0.21725	0.00631925	0.151964	5.55985	0.638292	-3.12276
Arabidopsis	root vs. shoot	AT5G56050	0.304781	0.0063315	0.152085	3.46841	25.9716	2.90459
Arabidopsis	root vs. shoot	AT1G27140	0.182799	0.00639628	0.152657	3.49961	16.4652	2.23416
Arabidopsis	root vs. shoot	AT4G12230	0.253589	0.0063766	0.152657	1.58871	7.97506	2.32764
Arabidopsis	root vs. shoot	AT5G66480	1.28101	0.00636925	0.152657	3.2496	0.0438629	-6.21112
Arabidopsis	root vs. shoot	AT2G21380	0.196426	0.00639487	0.152657	1.56436	6.44301	2.04216
Arabidopsis	root vs. shoot	AT5G50740	0.0359636	0.0063986	0.152657	2.93858	5.46739	0.895735
Arabidopsis	root vs. shoot	AT1G56660	0.0517156	0.00638652	0.152657	31.1212	90.763	1.54421
Arabidopsis	root vs. shoot	AT1G15490	0.104591	0.00641295	0.152827	1.50448	0.515408	-1.54548
Arabidopsis	root vs. shoot	AT2G04270	0.0256511	0.00642276	0.152879	5.09743	2.85429	-0.836638
Arabidopsis	root vs. shoot	AT4G09350	0.33585	0.00645123	0.152879	50.3923	5.71277	-3.14094
Arabidopsis	root vs. shoot	AT3G61410	0.273973	0.00643165	0.152879	2.79213	0.308176	-3.17954
Arabidopsis	root vs. shoot	AT1G73750	0.264482	0.00644207	0.152879	3.43376	0.603022	-2.50951
Arabidopsis	root vs. shoot	AT5G57740	0.0726895	0.00644677	0.152879	1.91992	0.760058	-1.33686
Arabidopsis	root vs. shoot	AT3G16860	0.0502918	0.00646224	0.152969	5.12037	2.36153	-1.11653
Arabidopsis	root vs. shoot	AT4G02260	0.0336807	0.00652459	0.153762	0.890451	1.63339	0.87526
Arabidopsis	root vs. shoot	AT4G24410	1.52154	0.0065248	0.153762	3.78803	0.21302	-4.15239
Arabidopsis	root vs. shoot	AT4G05210	0.283638	0.00651962	0.153762	2.01766	12.9973	2.68746
Arabidopsis	root vs. shoot	AT3G02300	0.0338164	0.00651721	0.153762	3.25345	1.78222	-0.868297
Arabidopsis	root vs. shoot	AT1G18140	0.0330315	0.00653578	0.153849	4.62749	9.35888	1.01611
Arabidopsis	root vs. shoot	AT2G39010	0.0385925	0.00655543	0.154047	7.62927	4.06366	-0.908765
Arabidopsis	root vs. shoot	AT1G34540	0.0536646	0.00655875	0.154047	5.71565	0.972412	-2.55528
Arabidopsis	root vs. shoot	AT2G45620	0.018	0.00658169	0.154414	2.2704	3.56205	0.649758
Arabidopsis	root vs. shoot	AT5G47590	0.377566	0.00659735	0.15461	0.656023	12.8404	4.2908
Arabidopsis	root vs. shoot	AT3G46550	0.0695417	0.00663615	0.155348	2.07567	4.83732	1.22063
Arabidopsis	root vs. shoot	AT5G51160	0.13967	0.00670309	0.156741	2.79859	0.448265	-2.64228
Arabidopsis	root vs. shoot	AT1G06925	2.84279	0.00676538	0.158023	16.5778	0.206552	-6.32661
Arabidopsis	root vs. shoot	AT1G06360	0.134703	0.00681721	0.159058	32.5395	2.79368	-3.54195
Arabidopsis	root vs. shoot	AT5G06530	0.0223761	0.00684413	0.15951	5.4831	3.32321	-0.722414
Arabidopsis	root vs. shoot	AT2G27740	0.145094	0.00685599	0.159611	7.01672	32.169	2.1968
Arabidopsis	root vs. shoot	AT4G32510	0.228802	0.0068725	0.159695	0.378608	1.9519	2.36611
Arabidopsis	root vs. shoot	AT2G33460	0.394414	0.0068747	0.159695	1.52478	0.100471	-3.92375
Arabidopsis	root vs. shoot	AT1G61130	0.436208	0.00689696	0.160037	6.58515	0.556273	-3.56535
Arabidopsis	root vs. shoot	AT1G10385	0.564162	0.00697835	0.160611	5.5745	100.206	4.16798
Arabidopsis	root vs. shoot	AT1G56680	0.0776255	0.00702756	0.160611	4.47374	15.1087	1.75582
Arabidopsis	root vs. shoot	AT1G07240	0.0311902	0.00701048	0.160611	3.9719	2.20809	-0.847031
Arabidopsis	root vs. shoot	AT2G24580	0.0233315	0.00700723	0.160611	6.58614	10.9185	0.729272
Arabidopsis	root vs. shoot	AT1G79040	0.0255993	0.00693224	0.160611	5.09102	3.08099	-0.72456
Arabidopsis	root vs. shoot	AT2G31920	0.160377	0.00696831	0.160611	2.85724	0.751279	-1.9272
Arabidopsis	root vs. shoot	AT3G15990	0.0789819	0.00700963	0.160611	4.52079	11.2564	1.3161
Arabidopsis	root vs. shoot	AT1G58210	0.126199	0.00702797	0.160611	126.966	39.404	-1.68803
Arabidopsis	root vs. shoot	AT5G39000	0.304245	0.00695198	0.160611	2.9778	10.9512	1.87878
Arabidopsis	root vs. shoot	AT1G71890	0.417877	0.00697597	0.160611	44.6317	3.73525	-3.57879
Arabidopsis	root vs. shoot	AT1G51620	0.522252	0.00699743	0.160611	2.30061	0.0670189	-5.1013
Arabidopsis	root vs. shoot	AT4G16920	0.2604	0.00702584	0.160611	1.28964	0.171152	-2.91362
Arabidopsis	root vs. shoot	AT2G23400	1.2771	0.00702424	0.160611	1.75901	106.946	5.92597
Arabidopsis	root vs. shoot	AT2G21220	0.102859	0.00695871	0.160611	0.690971	7.0749	3.35601
Arabidopsis	root vs. shoot	AT4G39235	0.0720797	0.00705681	0.161096	0.781689	1.84969	1.24262
Arabidopsis	root vs. shoot	AT5G66870	0.182901	0.00708741	0.16162	1.93586	0.265633	-2.86547
Arabidopsis	root vs. shoot	AT1G78490	0.0769178	0.00711816	0.162147	13.1551	5.19448	-1.34057
Arabidopsis	root vs. shoot	AT3G26125	0.255403	0.00715155	0.162732	2.9907	16.1555	2.43347
Arabidopsis	root vs. shoot	AT5G05210	0.017106	0.00718592	0.163013	7.69544	12.0069	0.641785
Arabidopsis	root vs. shoot	AT3G49930	0.174356	0.00717922	0.163013	2.60074	0.450695	-2.5287
Arabidopsis	root vs. shoot	AT1G04555	0.0850018	0.00718697	0.163013	1.89653	0.740662	-1.35648
Arabidopsis	root vs. shoot	AT1G15980	0.0367313	0.00723034	0.163821	11.304	5.80578	-0.961268
Arabidopsis	root vs. shoot	AT1G35340	0.0273674	0.00724667	0.16384	2.01274	3.52909	0.810135
Arabidopsis	root vs. shoot	AT3G48880	0.0255617	0.00724354	0.16384	4.11678	2.39858	-0.779335
Arabidopsis	root vs. shoot	AT1G54930	0.976291	0.00726722	0.164129	50.6601	1.37332	-5.20511
Arabidopsis	root vs. shoot	AT1G71460	0.0839956	0.00731001	0.164919	2.36231	6.49142	1.45834
Arabidopsis	root vs. shoot	AT1G49430	0.0160949	0.00736867	0.166066	5.99784	3.8918	-0.624004
Arabidopsis	root vs. shoot	AT5G44770	0.640325	0.007378	0.166099	3.63903	20.1278	2.46756
Arabidopsis	root vs. shoot	AT2G47970	0.020853	0.00739885	0.166392	5.12012	3.21779	-0.670106
Arabidopsis	root vs. shoot	AT1G73490	0.0237032	0.00742211	0.166737	4.55814	2.77354	-0.716718
Arabidopsis	root vs. shoot	AT5G18360	0.180333	0.00744264	0.167021	2.343	0.556312	-2.07439
Arabidopsis	root vs. shoot	AT5G53210	0.377069	0.00748419	0.167776	34.6486	2.99665	-3.53137
Arabidopsis	root vs. shoot	AT3G55370	0.0899573	0.00758957	0.169958	1.95553	5.42942	1.47324
Arabidopsis	root vs. shoot	AT2G22560	0.0185086	0.00761616	0.170029	4.53378	7.51519	0.729095
Arabidopsis	root vs. shoot	AT1G44050	0.163966	0.00760106	0.170029	3.78862	15.3591	2.01935
Arabidopsis	root vs. shoot	AT2G31130	0.0732011	0.00761682	0.170029	5.62716	2.32657	-1.2742
Arabidopsis	root vs. shoot	AT5G67385	0.0450396	0.0076265	0.170065	3.72161	1.87781	-0.986874
Arabidopsis	root vs. shoot	AT5G46470	0.0693331	0.00765707	0.170555	2.14953	0.924639	-1.21706
Arabidopsis	root vs. shoot	AT3G02020	0.0247978	0.00766457	0.170555	1.92143	3.17825	0.726053
Arabidopsis	root vs. shoot	AT5G23840	0.0349355	0.00768293	0.170679	2.95429	7.21095	1.28738
Arabidopsis	root vs. shoot	AT5G64640	0.310413	0.00768627	0.170679	4.34678	25.4259	2.54828
Arabidopsis	root vs. shoot	AT1G03770	0.0593735	0.00773827	0.171512	2.33758	5.23387	1.16286
Arabidopsis	root vs. shoot	AT1G21520	0.614052	0.0077481	0.171512	0.416103	2.5221	2.59962
Arabidopsis	root vs. shoot	AT4G19680	0.0643319	0.00774675	0.171512	5.92356	2.24102	-1.40231
Arabidopsis	root vs. shoot	AT5G04810	0.037653	0.00781397	0.172789	1.44501	2.67413	0.887992
Arabidopsis	root vs. shoot	AT1G03600	0.0552331	0.00790965	0.17454	9.73821	4.5908	-1.08491
Arabidopsis	root vs. shoot	AT3G24190	0.0116188	0.00790692	0.17454	2.9861	4.21437	0.497057
Arabidopsis	root vs. shoot	AT1G48030	0.00864164	0.00792925	0.17479	6.26357	8.36717	0.417755
Arabidopsis	root vs. shoot	AT3G55970	1.45114	0.0079479	0.175019	35.0186	4.50196	-2.95949
Arabidopsis	root vs. shoot	AT1G34060	1.10803	0.00797867	0.175332	5.58373	195.284	5.1282
Arabidopsis	root vs. shoot	AT3G14180	0.0308228	0.00797707	0.175332	3.79492	6.75468	0.831816
Arabidopsis	root vs. shoot	AT2G33760	0.484784	0.00800915	0.175819	0.68552	7.56988	3.465
Arabidopsis	root vs. shoot	AT3G46620	0.0242318	0.00805475	0.176637	2.69088	4.44942	0.725542
Arabidopsis	root vs. shoot	AT2G31900	0.0801342	0.00806963	0.17678	3.1464	1.28944	-1.28696
Arabidopsis	root vs. shoot	AT3G12345	0.0691707	0.00815618	0.178123	7.40458	3.19082	-1.21449
Arabidopsis	root vs. shoot	AT5G16390	0.0170998	0.00815102	0.178123	3.73397	5.63074	0.592612
Arabidopsis	root vs. shoot	AT2G40400	0.116759	0.00814084	0.178123	1.36094	3.91383	1.52398
Arabidopsis	root vs. shoot	AT1G07930	0.0154194	0.00822792	0.17937	3.98706	2.71933	-0.552071
Arabidopsis	root vs. shoot	AT1G48070	0.501263	0.00823023	0.17937	5.06219	20.813	2.03965
Arabidopsis	root vs. shoot	AT2G37640	0.0526977	0.0082787	0.179686	6.76836	3.28764	-1.04175
Arabidopsis	root vs. shoot	AT4G25434	0.700153	0.00826239	0.179686	4.60464	0.100655	-5.5156
Arabidopsis	root vs. shoot	AT3G08710	0.0386694	0.0082764	0.179686	5.58679	2.93066	-0.930795
Arabidopsis	root vs. shoot	AT1G23380	0.0731343	0.00826244	0.179686	4.57366	1.93475	-1.2412
Arabidopsis	root vs. shoot	AT3G01850	0.0770967	0.0083166	0.180324	1.41186	3.41474	1.27418
Arabidopsis	root vs. shoot	AT1G64750	0.0282039	0.00833255	0.180484	4.72579	2.77363	-0.768779
Arabidopsis	root vs. shoot	AT3G04640	0.267597	0.00836131	0.180754	7.83619	51.1925	2.70771
Arabidopsis	root vs. shoot	AT4G24770	0.0191871	0.00836207	0.180754	6.39392	4.13469	-0.628921
Arabidopsis	root vs. shoot	AT1G52150	0.0331933	0.00842804	0.181994	1.75875	0.993633	-0.823762
Arabidopsis	root vs. shoot	AT1G07520	0.252872	0.00849517	0.183201	1.85461	9.01968	2.28196
Arabidopsis	root vs. shoot	AT4G01670	0.166709	0.00850123	0.183201	3.7899	14.4949	1.93531
Arabidopsis	root vs. shoot	AT1G24120	0.0202908	0.00851723	0.183359	2.56331	4.0832	0.671694
Arabidopsis	root vs. shoot	AT1G16220	0.297893	0.00853625	0.183581	2.96852	16.3413	2.46071
Arabidopsis	root vs. shoot	AT3G55110	0.308925	0.00861121	0.185005	28.02	3.56798	-2.97328
Arabidopsis	root vs. shoot	AT1G61050	0.0398283	0.00862562	0.185127	5.04208	1.94376	-1.37517
Arabidopsis	root vs. shoot	AT4G27140	0.482118	0.00864988	0.185334	0.292982	8.97104	4.93639
Arabidopsis	root vs. shoot	AT3G19570	0.217539	0.00866154	0.185334	3.71279	0.877191	-2.08154
Arabidopsis	root vs. shoot	AT5G38990	0.112118	0.00865917	0.185334	9.5434	3.1795	-1.5857
Arabidopsis	root vs. shoot	AT2G39760	0.263521	0.00870549	0.185899	2.4792	12.0384	2.2797
Arabidopsis	root vs. shoot	AT3G20220	2.73593	0.0087016	0.185899	0.923252	0.0235101	-5.29537
Arabidopsis	root vs. shoot	AT4G38830	0.774091	0.00872241	0.186072	2.30322	39.6385	4.10518
Arabidopsis	root vs. shoot	AT1G29700	0.0490967	0.00883905	0.188371	2.73649	5.7048	1.05985
Arabidopsis	root vs. shoot	AT1G23260	0.0237998	0.00886564	0.188734	5.14623	3.1271	-0.71869
Arabidopsis	root vs. shoot	AT5G17880	0.157586	0.00887394	0.188734	15.2065	4.49448	-1.75846
Arabidopsis	root vs. shoot	AT1G13340	0.445234	0.0089419	0.189989	2.869	0.294967	-3.28192
Arabidopsis	root vs. shoot	AT1G79620	0.2392	0.00895308	0.190035	3.68657	16.6095	2.17165
Arabidopsis	root vs. shoot	AT3G58710	0.0599546	0.00901895	0.191099	3.13334	1.39044	-1.17216
Arabidopsis	root vs. shoot	AT1G79880	0.0781124	0.00902127	0.191099	2.91094	1.18075	-1.30179
Arabidopsis	root vs. shoot	AT4G31805	0.281592	0.00906595	0.191662	22.8453	2.86373	-2.99593
Arabidopsis	root vs. shoot	AT2G31018	3.54217	0.00905787	0.191662	0.100822	13.2206	7.03483
Arabidopsis	root vs. shoot	AT2G41200	0.17971	0.00909014	0.191982	2.72421	0.68592	-1.98973
Arabidopsis	root vs. shoot	AT5G41520	0.0113917	0.00917001	0.192462	6.35668	8.79846	0.468976
Arabidopsis	root vs. shoot	AT3G54020	0.0517747	0.00916319	0.192462	3.03827	1.41452	-1.10294
Arabidopsis	root vs. shoot	AT5G60530	0.031316	0.00917657	0.192462	5.43963	12.3945	1.18812
Arabidopsis	root vs. shoot	AT3G20830	0.0561077	0.00912487	0.192462	1.83251	3.95114	1.10845
Arabidopsis	root vs. shoot	AT2G46700	0.0408737	0.00913155	0.192462	2.34848	4.47003	0.928559
Arabidopsis	root vs. shoot	AT5G42765	0.0620566	0.00915118	0.192462	1.4863	3.31661	1.15798
Arabidopsis	root vs. shoot	AT5G62650	0.014714	0.00917085	0.192462	2.90447	4.31476	0.571006
Arabidopsis	root vs. shoot	AT4G36150	0.379546	0.00919087	0.192571	3.26283	21.9494	2.74999
Arabidopsis	root vs. shoot	AT1G65541	2.64181	0.00920953	0.192581	0.0264702	0.726527	4.77858
Arabidopsis	root vs. shoot	AT4G38780	0.100313	0.00920577	0.192581	4.72771	1.70491	-1.47145
Arabidopsis	root vs. shoot	AT2G45470	0.0155314	0.00924136	0.193056	5.14812	7.52395	0.547444
Arabidopsis	root vs. shoot	AT4G39970	0.0239734	0.0092812	0.193697	6.90069	4.07461	-0.760078
Arabidopsis	root vs. shoot	AT4G27240	0.20944	0.00931374	0.194185	0.567373	2.54238	2.16381
Arabidopsis	root vs. shoot	AT1G32070	0.0444005	0.00933932	0.194526	2.64461	5.11301	0.951119
Arabidopsis	root vs. shoot	AT3G06750	0.0631554	0.00935869	0.194547	1.60338	3.54096	1.14302
Arabidopsis	root vs. shoot	AT2G37810	0.483175	0.0093566	0.194547	478.018	1816.47	1.92601
Arabidopsis	root vs. shoot	AT5G55120	0.14764	0.0094297	0.195831	0.696339	2.24203	1.68694
Arabidopsis	root vs. shoot	AT5G65170	0.183967	0.00945113	0.195891	5.00241	1.17436	-2.09075
Arabidopsis	root vs. shoot	AT5G01890	0.164332	0.0094508	0.195891	3.1266	10.7096	1.77624
Arabidopsis	root vs. shoot	AT3G13710	0.0715698	0.00948373	0.196289	3.03977	7.37265	1.27822
Arabidopsis	root vs. shoot	AT3G46080	1.39871	0.00948887	0.196289	22.7712	0.299989	-6.24616
Arabidopsis	root vs. shoot	AT3G61260	0.0201566	0.00951057	0.196546	5.58466	3.59313	-0.636228
Arabidopsis	root vs. shoot	AT2G03750	0.118122	0.00955509	0.197273	12.8212	3.95299	-1.69751
Arabidopsis	root vs. shoot	AT1G28170	1.0191	0.00961039	0.198138	4.32761	32.0057	2.88669
Arabidopsis	root vs. shoot	AT4G35970	0.0839571	0.00961571	0.198138	2.75065	7.157	1.37958
Arabidopsis	root vs. shoot	AT1G50710	0.0327023	0.00963176	0.198276	4.01208	2.27945	-0.815665
Arabidopsis	root vs. shoot	AT3G62900	0.0744879	0.0096549	0.198559	1.15306	2.63936	1.19472
Arabidopsis	root vs. shoot	AT3G24480	0.0154563	0.0096799	0.198628	2.8071	4.08758	0.542163
Arabidopsis	root vs. shoot	AT4G34830	0.0499672	0.00968643	0.198628	6.41831	3.20279	-1.00286
Arabidopsis	root vs. shoot	AT2G45190	0.384659	0.00967975	0.198628	31.474	3.65705	-3.10541
Arabidopsis	root vs. shoot	AT4G02780	0.692878	0.00970501	0.198722	49.8048	2.79142	-4.15721
Arabidopsis	root vs. shoot	AT3G28750	2.33483	0.00971916	0.198722	61.5019	0.156611	-8.6173
Arabidopsis	root vs. shoot	AT5G04500	1.09038	0.00971744	0.198722	16.2623	3.51026	-2.21188
Arabidopsis	root vs. shoot	AT3G19620	0.653064	0.00977599	0.198923	171.65	6.4256	-4.73949
Arabidopsis	root vs. shoot	AT1G66360	1.64781	0.00973981	0.198923	0.276927	31.7796	6.84245
Arabidopsis	root vs. shoot	AT3G29190	2.41298	0.00976184	0.198923	4.32601	0.144456	-4.90434
Arabidopsis	root vs. shoot	AT3G59940	0.0340989	0.00977007	0.198923	3.93003	2.22564	-0.820319
Arabidopsis	root vs. shoot	AT1G23790	0.329106	0.00976917	0.198923	4.3965	25.6816	2.54631
Arabidopsis	root vs. shoot	AT1G55870	0.0743911	0.0097973	0.199165	3.14402	1.3579	-1.21124
Arabidopsis	root vs. shoot	AT4G17500	0.0641979	0.00982835	0.199604	4.68139	10.52	1.16813
Arabidopsis	root vs. shoot	AT4G01800	0.0128198	0.00985051	0.199723	3.78191	5.39516	0.51255
Arabidopsis	root vs. shoot	AT1G66480	0.18856	0.00985307	0.199723	5.82102	1.28576	-2.17865
Arabidopsis	root vs. shoot	AT3G07430	0.0143077	0.00993831	0.200301	2.724	3.97177	0.544057
Arabidopsis	root vs. shoot	AT5G06760	0.195921	0.00994693	0.200301	22.9061	5.29583	-2.1128
Arabidopsis	root vs. shoot	AT5G60820	0.233357	0.00993478	0.200301	4.13538	18.2488	2.14172
Arabidopsis	root vs. shoot	AT1G64280	0.0565095	0.00994785	0.200301	2.96726	1.42299	-1.06021
Arabidopsis	root vs. shoot	AT4G02760	0.124493	0.00990301	0.200301	1.45764	4.55439	1.64363
Arabidopsis	root vs. shoot	AT2G36630	0.0587149	0.00992859	0.200301	8.91754	4.05538	-1.13681
Arabidopsis	root vs. shoot	AT5G25610	0.0330641	0.00990257	0.200301	9.38417	5.39192	-0.79943
Arabidopsis	root vs. shoot	AT1G13510	0.119742	0.0099589	0.200333	4.06819	0.903257	-2.17118
Arabidopsis	root vs. shoot	AT5G38350	0.250285	0.0099911	0.20079	3.35264	26.127	2.96217
Arabidopsis	root vs. shoot	AT5G40960	0.180578	0.0100079	0.200936	6.09177	1.46018	-2.06071
Arabidopsis	root vs. shoot	AT2G33380	0.153429	0.0100256	0.201101	27.5438	5.54344	-2.31287
Arabidopsis	root vs. shoot	AT2G23100	0.0815812	0.0100542	0.201484	2.75676	1.13251	-1.28345
Arabidopsis	root vs. shoot	AT2G26030	0.195585	0.0100842	0.201894	2.3206	0.591218	-1.97273
Arabidopsis	root vs. shoot	AT1G66180	0.0179074	0.0101401	0.202821	4.41522	6.66426	0.593958
Arabidopsis	root vs. shoot	AT2G26000	0.0811795	0.0101804	0.203259	4.9472	1.99389	-1.31103
Arabidopsis	root vs. shoot	AT1G72750	0.0231101	0.0101812	0.203259	4.55431	2.85011	-0.676213
Arabidopsis	root vs. shoot	AT2G27880	0.550468	0.0102081	0.203604	5.93683	64.1468	3.43361
Arabidopsis	root vs. shoot	AT1G54040	0.458741	0.0102404	0.203943	43.7243	2.20899	-4.30698
Arabidopsis	root vs. shoot	AT3G04350	0.0380742	0.0102444	0.203943	2.08786	3.80027	0.864075
Arabidopsis	root vs. shoot	AT1G03740	0.0302614	0.0102593	0.204049	2.16434	1.25602	-0.785063
Arabidopsis	root vs. shoot	AT1G60460	0.116777	0.0102889	0.204089	5.43415	1.77374	-1.61526
Arabidopsis	root vs. shoot	AT1G08940	0.0856252	0.0102999	0.204089	2.19237	5.685	1.37467
Arabidopsis	root vs. shoot	AT3G08850	0.0210099	0.0102971	0.204089	1.72285	2.66779	0.630846
Arabidopsis	root vs. shoot	AT4G25140	0.98455	0.0102916	0.204089	22.3422	6.18511	-1.8529
Arabidopsis	root vs. shoot	AT5G28610	1.62527	0.0103737	0.205358	5.21194	0.308068	-4.0805
Arabidopsis	root vs. shoot	AT1G50990	0.585125	0.0104166	0.205849	1.93633	0.142932	-3.75992
Arabidopsis	root vs. shoot	AT1G78630	0.0168091	0.010418	0.205849	8.50731	5.70715	-0.575933
Arabidopsis	root vs. shoot	AT5G01980	0.0598612	0.0104382	0.206057	2.29243	1.07566	-1.09165
Arabidopsis	root vs. shoot	AT3G15640	0.0189528	0.0104814	0.206332	5.39763	3.56134	-0.599906
Arabidopsis	root vs. shoot	AT3G61630	0.121688	0.0104626	0.206332	0.83296	2.46455	1.56501
Arabidopsis	root vs. shoot	AT3G48690	0.0149405	0.0104754	0.206332	5.7283	8.31122	0.536952
Arabidopsis	root vs. shoot	AT5G35580	0.065787	0.0105035	0.206383	3.4553	8.41086	1.28344
Arabidopsis	root vs. shoot	AT1G74930	1.74562	0.0105002	0.206383	0.445359	9.64058	4.43608
Arabidopsis	root vs. shoot	AT4G25160	0.656392	0.0105251	0.206424	1.34813	17.0587	3.66148
Arabidopsis	root vs. shoot	AT5G03640	0.0436226	0.0105163	0.206424	1.89921	0.713683	-1.41204
Arabidopsis	root vs. shoot	AT5G26940	0.0855972	0.0106105	0.207908	2.00809	0.829305	-1.27585
Arabidopsis	root vs. shoot	AT5G07610	2.04016	0.0106318	0.208132	0.521651	0.0330444	-3.9806
Arabidopsis	root vs. shoot	AT2G23300	0.152283	0.0106836	0.208952	2.21412	7.34093	1.72923
Arabidopsis	root vs. shoot	AT4G21230	0.270055	0.0107224	0.209518	1.74737	9.13931	2.3869
Arabidopsis	root vs. shoot	AT2G22800	0.178053	0.0107819	0.210487	7.2056	1.82193	-1.98365
Arabidopsis	root vs. shoot	AT1G70500	0.142357	0.0108414	0.211452	5.02029	17.5111	1.80243
Arabidopsis	root vs. shoot	AT5G16980	0.389736	0.010936	0.213101	8.59468	4.81627	-0.835529
Arabidopsis	root vs. shoot	AT3G47980	0.0569079	0.0109596	0.213365	1.89089	3.91473	1.04985
Arabidopsis	root vs. shoot	AT1G30550	0.150854	0.0110031	0.214014	3.38776	1.01179	-1.74342
Arabidopsis	root vs. shoot	AT1G72450	0.0302431	0.0110438	0.214411	5.31996	3.08097	-0.788031
Arabidopsis	root vs. shoot	AT5G11360	1.3625	0.0110387	0.214411	0.55613	10.5492	4.24557
Arabidopsis	root vs. shoot	AT2G17040	0.713307	0.0110643	0.214612	0.2137	5.09883	4.57651
Arabidopsis	root vs. shoot	AT5G57100	0.0748177	0.0110781	0.214683	5.67165	2.47457	-1.19659
Arabidopsis	root vs. shoot	AT1G54520	0.0266489	0.0111774	0.21641	4.65999	7.71845	0.727984
Arabidopsis	root vs. shoot	AT4G11930	0.84206	0.0111983	0.216499	34.3577	1.63685	-4.39163
Arabidopsis	root vs. shoot	AT2G37700	0.119744	0.0112025	0.216499	3.52917	36.722	3.37925
Arabidopsis	root vs. shoot	AT1G75110	0.23645	0.0112307	0.216667	0.660012	3.09618	2.22992
Arabidopsis	root vs. shoot	AT1G64930	0.235674	0.0112316	0.216667	4.50884	31.4004	2.79995
Arabidopsis	root vs. shoot	AT3G44740	0.898928	0.011244	0.216709	1.06743	0.0530229	-4.33138
Arabidopsis	root vs. shoot	AT1G23860	0.0879643	0.0112899	0.216999	3.66662	8.99587	1.29481
Arabidopsis	root vs. shoot	AT2G02061	0.588811	0.0112803	0.216999	0.319647	9.39313	4.87705
Arabidopsis	root vs. shoot	AT1G74810	0.306066	0.0112694	0.216999	4.70658	44.072	3.22711
Arabidopsis	root vs. shoot	AT4G00695	1.56963	0.0113099	0.217187	7.2542	0.369729	-4.29427
Arabidopsis	root vs. shoot	AT1G01900	0.0499575	0.0113878	0.218484	7.74664	3.89713	-0.991156
Arabidopsis	root vs. shoot	AT4G23560	0.238599	0.0114166	0.218839	58.18	4.68544	-3.63427
Arabidopsis	root vs. shoot	AT3G16090	0.0229564	0.0114579	0.219432	5.46419	3.42655	-0.673253
Arabidopsis	root vs. shoot	AT4G17940	0.0320184	0.011485	0.219744	4.90906	8.55085	0.80062
Arabidopsis	root vs. shoot	AT3G48540	0.393219	0.011495	0.219744	4.12232	27.8395	2.7556
Arabidopsis	root vs. shoot	AT2G38360	0.029002	0.0115873	0.220555	3.39966	5.70086	0.745789
Arabidopsis	root vs. shoot	AT3G14452	4.62252	0.0115613	0.220555	10.0334	0.0490764	-7.67556
Arabidopsis	root vs. shoot	AT3G55130	0.147754	0.0115799	0.220555	8.46688	2.29311	-1.88452
Arabidopsis	root vs. shoot	AT2G41380	0.0385871	0.0115895	0.220555	6.60342	3.37852	-0.966822
Arabidopsis	root vs. shoot	AT5G04380	0.683153	0.0115727	0.220555	6.25536	2.22139	-1.49363
Arabidopsis	root vs. shoot	AT4G33625	0.0420016	0.0117094	0.222055	5.78957	3.07445	-0.913127
Arabidopsis	root vs. shoot	AT5G42060	0.0302541	0.0117054	0.222055	5.0946	2.91248	-0.806719
Arabidopsis	root vs. shoot	AT1G48760	0.113719	0.0117103	0.222055	2.90241	7.87533	1.44009
Arabidopsis	root vs. shoot	AT5G06710	0.497052	0.0116932	0.222055	5.30124	44.9222	3.08303
Arabidopsis	root vs. shoot	AT1G45201	0.017147	0.0117254	0.222142	8.433	5.71657	-0.560895
Arabidopsis	root vs. shoot	AT2G18710	0.0183972	0.0117882	0.222822	2.33777	3.55101	0.603095
Arabidopsis	root vs. shoot	AT3G18560	0.0493544	0.0117978	0.222822	7.32087	3.51746	-1.05748
Arabidopsis	root vs. shoot	AT5G58690	0.166482	0.0118034	0.222822	2.79417	9.8678	1.82031
Arabidopsis	root vs. shoot	AT2G47220	1.85762	0.0117962	0.222822	2.04501	0.0213947	-6.57871
Arabidopsis	root vs. shoot	AT2G42760	0.0630049	0.0118335	0.223191	6.077	2.59749	-1.22624
Arabidopsis	root vs. shoot	AT3G04510	3.01298	0.0118892	0.224043	16.368	0.256626	-5.99507
Arabidopsis	root vs. shoot	AT3G15270	3.02474	0.0119573	0.225124	61.2407	0.100599	-9.24973
Arabidopsis	root vs. shoot	AT2G35130	0.175406	0.0119864	0.225473	10.3562	2.53039	-2.03306
Arabidopsis	root vs. shoot	AT1G61490	1.85236	0.0121125	0.225638	0.0911445	7.98836	6.4536
Arabidopsis	root vs. shoot	AT4G05040	0.20746	0.0120584	0.225638	1.85407	0.466307	-1.99135
Arabidopsis	root vs. shoot	AT5G44582	0.75081	0.0120754	0.225638	0.0673554	2.02963	4.91328
Arabidopsis	root vs. shoot	AT1G07030	0.147771	0.0121093	0.225638	1.62903	5.08301	1.64167
Arabidopsis	root vs. shoot	AT5G38780	0.322287	0.0120853	0.225638	0.437795	2.7862	2.66997
Arabidopsis	root vs. shoot	AT5G50790	3.80986	0.0120936	0.225638	12.041	0.124947	-6.59049
Arabidopsis	root vs. shoot	AT5G48440	0.0354057	0.0120777	0.225638	2.3202	4.14968	0.838752
Arabidopsis	root vs. shoot	AT1G07450	0.266527	0.0120868	0.225638	29.9228	4.10355	-2.8663
Arabidopsis	root vs. shoot	AT3G56410	0.0323684	0.012023	0.225638	3.71489	2.17626	-0.77147
Arabidopsis	root vs. shoot	AT3G16630	0.15464	0.0120917	0.225638	1.57997	4.99128	1.65952
Arabidopsis	root vs. shoot	AT5G57030	0.0620727	0.0120797	0.225638	6.9303	3.25535	-1.09011
Arabidopsis	root vs. shoot	AT3G28007	2.07012	0.0121333	0.225796	0.11177	1.4768	3.72388
Arabidopsis	root vs. shoot	AT5G40720	0.148612	0.0121423	0.225796	5.07101	1.48204	-1.77468
Arabidopsis	root vs. shoot	AT5G64040	0.0329801	0.01216	0.225926	9.9508	5.81512	-0.775003
Arabidopsis	root vs. shoot	AT1G12520	0.0104899	0.0121999	0.226069	2.91517	3.97268	0.446531
Arabidopsis	root vs. shoot	AT3G43190	0.0608358	0.0121817	0.226069	4.55675	9.71246	1.09183
Arabidopsis	root vs. shoot	AT5G45930	0.0410318	0.0122052	0.226069	11.2013	5.73935	-0.964707
Arabidopsis	root vs. shoot	AT5G53990	0.258979	0.0122104	0.226069	4.07234	25.318	2.63623
Arabidopsis	root vs. shoot	AT1G12290	0.126993	0.0122252	0.226146	5.17676	1.53105	-1.75753
Arabidopsis	root vs. shoot	AT3G32030	0.446312	0.0122479	0.226367	5.02407	70.0169	3.80078
Arabidopsis	root vs. shoot	AT5G01734	0.580159	0.0122619	0.226428	119.463	1604.54	3.74752
Arabidopsis	root vs. shoot	AT2G15042	0.583382	0.0123082	0.22669	162.574	7.66957	-4.4058
Arabidopsis	root vs. shoot	AT1G34120	0.0677313	0.0123012	0.22669	2.88219	6.45259	1.16271
Arabidopsis	root vs. shoot	AT1G21160	0.104185	0.0122955	0.22669	2.14768	0.806403	-1.41321
Arabidopsis	root vs. shoot	AT1G02960	0.0958931	0.0123465	0.227	2.40249	0.933815	-1.36332
Arabidopsis	root vs. shoot	AT2G01860	0.131335	0.0123459	0.227	1.38183	4.19727	1.60287
Arabidopsis	root vs. shoot	AT1G09815	0.0608068	0.0123605	0.22706	10.0667	4.82197	-1.0619
Arabidopsis	root vs. shoot	AT1G02300	0.637238	0.0123913	0.227332	2.66897	0.235796	-3.50067
Arabidopsis	root vs. shoot	AT3G25970	0.666255	0.0124076	0.227332	3.44105	0.258101	-3.73684
Arabidopsis	root vs. shoot	AT1G58150	0.897502	0.0123969	0.227332	0.0303063	0.96798	4.99729
Arabidopsis	root vs. shoot	AT3G22750	0.0264142	0.0124488	0.227386	5.08483	3.12421	-0.702708
Arabidopsis	root vs. shoot	AT5G21430	0.34758	0.0124351	0.227386	16.0196	2.43331	-2.71885
Arabidopsis	root vs. shoot	AT4G36060	0.21511	0.0124534	0.227386	3.56568	16.3064	2.19319
Arabidopsis	root vs. shoot	AT5G23330	0.437866	0.0124473	0.227386	0.209853	1.56288	2.89676
Arabidopsis	root vs. shoot	AT5G26300	0.11907	0.0124933	0.227917	3.29042	0.954816	-1.78498
Arabidopsis	root vs. shoot	AT1G14170	0.0152201	0.0125249	0.228296	5.39803	3.60781	-0.58131
Arabidopsis	root vs. shoot	AT1G23010	0.0448085	0.0125366	0.228312	4.94872	10.2699	1.05329
Arabidopsis	root vs. shoot	AT1G20180	2.48544	0.0125646	0.228605	0.257407	6.82067	4.72779
Arabidopsis	root vs. shoot	AT1G61420	1.06114	0.0125742	0.228605	0.057544	1.72779	4.90812
Arabidopsis	root vs. shoot	AT3G03280	0.351826	0.0126245	0.229322	3.96363	0.642062	-2.62604
Arabidopsis	root vs. shoot	AT5G55620	0.115654	0.0126375	0.22936	27.4237	6.22293	-2.13976
Arabidopsis	root vs. shoot	AT2G21580	0.0129872	0.0127136	0.230444	5.60955	4.00609	-0.485691
Arabidopsis	root vs. shoot	AT1G07180	0.0335322	0.0127298	0.230444	9.53002	4.86327	-0.970553
Arabidopsis	root vs. shoot	AT5G23770	1.86657	0.0127251	0.230444	5.28062	0.0415838	-6.98854
Arabidopsis	root vs. shoot	AT4G24350	0.120195	0.0127514	0.230637	13.4025	3.99973	-1.74453
Arabidopsis	root vs. shoot	AT5G26170	1.09204	0.012809	0.231481	5.49534	0.187006	-4.87705
Arabidopsis	root vs. shoot	AT1G67650	0.116772	0.0128372	0.231776	5.38617	1.89866	-1.50428
Arabidopsis	root vs. shoot	AT4G27750	0.0488993	0.0128472	0.231776	3.09628	1.60122	-0.951363
Arabidopsis	root vs. shoot	AT5G62165	0.496564	0.0128788	0.232148	4.22528	0.347196	-3.60522
Arabidopsis	root vs. shoot	AT1G17220	0.0113208	0.0129037	0.232399	5.36006	3.89842	-0.459361
Arabidopsis	root vs. shoot	AT3G22104	0.323898	0.0130187	0.233278	3.31529	17.5059	2.40063
Arabidopsis	root vs. shoot	AT2G27660	0.241597	0.0130093	0.233278	4.18759	19.203	2.19713
Arabidopsis	root vs. shoot	AT3G32930	0.0304334	0.0129738	0.233278	5.53195	3.28305	-0.752751
Arabidopsis	root vs. shoot	AT3G51120	0.0148585	0.012993	0.233278	2.03156	2.93559	0.531062
Arabidopsis	root vs. shoot	AT5G63670	0.0727976	0.0129931	0.233278	1.79101	3.96981	1.1483
Arabidopsis	root vs. shoot	AT5G43080	0.0929145	0.0130048	0.233278	4.80164	1.92434	-1.31916
Arabidopsis	root vs. shoot	AT5G37360	0.031062	0.0130489	0.233621	3.56961	6.22893	0.80322
Arabidopsis	root vs. shoot	AT3G21640	0.0478005	0.013066	0.23373	5.0015	9.71881	0.958418
Arabidopsis	root vs. shoot	AT4G36850	0.216487	0.013112	0.234355	9.02641	2.12082	-2.08953
Arabidopsis	root vs. shoot	AT1G14070	0.0389254	0.0131249	0.234388	3.30148	1.7124	-0.947093
Arabidopsis	root vs. shoot	AT1G61190	0.156779	0.0131736	0.235058	8.28069	2.47637	-1.74152
Arabidopsis	root vs. shoot	AT1G09310	0.0423132	0.0132134	0.235373	11.501	6.34572	-0.857902
Arabidopsis	root vs. shoot	AT1G66230	0.102644	0.0132042	0.235373	6.70317	2.4608	-1.44572
Arabidopsis	root vs. shoot	AT4G21190	0.0409135	0.0132934	0.236598	7.2312	3.59825	-1.00694
Arabidopsis	root vs. shoot	AT4G26455	0.0650801	0.0133598	0.23758	1.37578	2.96305	1.10683
Arabidopsis	root vs. shoot	AT2G40790	3.28541	0.013384	0.237611	0.221884	14.2854	6.0086
Arabidopsis	root vs. shoot	AT3G03840	0.950862	0.0133742	0.237611	0.27471	1.40406	2.35363
Arabidopsis	root vs. shoot	AT3G52370	0.0241575	0.013454	0.238653	3.45202	5.50329	0.672854
Arabidopsis	root vs. shoot	AT5G51780	0.0321099	0.0134966	0.238673	2.996	5.62331	0.90838
Arabidopsis	root vs. shoot	AT1G51110	0.11685	0.01347	0.238673	8.4071	2.9924	-1.4903
Arabidopsis	root vs. shoot	AT4G24670	0.0255925	0.0135002	0.238673	6.41049	3.90769	-0.714118
Arabidopsis	root vs. shoot	AT1G73680	0.0192265	0.0134854	0.238673	4.74587	3.11873	-0.605714
Arabidopsis	root vs. shoot	AT4G32980	0.398044	0.0135298	0.238997	13.0352	1.96704	-2.72831
Arabidopsis	root vs. shoot	AT1G13190	0.0352573	0.0135739	0.239376	3.02157	5.26906	0.802248
Arabidopsis	root vs. shoot	AT2G04690	0.0228235	0.013568	0.239376	3.87035	2.44435	-0.663011
Arabidopsis	root vs. shoot	AT1G33670	0.436416	0.0135921	0.239497	9.98692	76.9767	2.94631
Arabidopsis	root vs. shoot	AT1G75960	0.32149	0.0136307	0.239977	0.431894	2.50666	2.53701
Arabidopsis	root vs. shoot	AT3G56020	0.0384622	0.0136718	0.240502	2.65404	4.67858	0.817879
Arabidopsis	root vs. shoot	AT3G52670	1.04143	0.0136942	0.240695	0.0291473	1.22329	5.39126
Arabidopsis	root vs. shoot	AT2G33420	1.32962	0.0137134	0.240832	68.3061	0.980773	-6.12195
Arabidopsis	root vs. shoot	AT2G18640	0.241143	0.0137308	0.240938	6.28506	15.0809	1.26273
Arabidopsis	root vs. shoot	AT3G27660	0.996408	0.0138026	0.241996	0.365298	12.2773	5.07077
Arabidopsis	root vs. shoot	AT3G56440	0.108526	0.0138347	0.242343	5.20377	1.90923	-1.44657
Arabidopsis	root vs. shoot	AT5G26622	0.566017	0.0138452	0.242343	0.0731207	0.858225	3.553
Arabidopsis	root vs. shoot	AT1G15260	0.230382	0.0138654	0.242496	19.6558	3.82523	-2.36133
Arabidopsis	root vs. shoot	AT3G14760	0.429653	0.0138838	0.242617	77.2542	4.73519	-4.02812
Arabidopsis	root vs. shoot	AT2G23410	0.0928297	0.0139527	0.24362	3.52906	8.3009	1.23398
Arabidopsis	root vs. shoot	AT1G79080	0.0580267	0.0139764	0.243829	3.09868	6.41107	1.04891
Arabidopsis	root vs. shoot	AT5G20130	0.0350769	0.0139877	0.243829	2.70386	4.77898	0.821682
Arabidopsis	root vs. shoot	AT5G01075	0.166721	0.0140595	0.244878	16.9879	4.32211	-1.9747
Arabidopsis	root vs. shoot	AT3G46350	1.36585	0.0140744	0.244935	0.600862	42.665	6.14987
Arabidopsis	root vs. shoot	AT1G66260	0.0148714	0.0141108	0.245369	6.7625	4.68915	-0.528229
Arabidopsis	root vs. shoot	AT5G66610	0.166525	0.0141727	0.246242	2.96275	0.839168	-1.81991
Arabidopsis	root vs. shoot	AT3G01730	0.346198	0.0143344	0.246421	1.94097	0.0824029	-4.55794
Arabidopsis	root vs. shoot	AT5G45310	0.871242	0.014283	0.246421	0.511245	3.92655	2.94118
Arabidopsis	root vs. shoot	AT1G23740	0.0219394	0.0141951	0.246421	8.51072	5.43843	-0.646089
Arabidopsis	root vs. shoot	AT3G19500	0.823913	0.0142267	0.246421	4.55866	0.238719	-4.25523
Arabidopsis	root vs. shoot	AT3G51630	0.0485643	0.014276	0.246421	0.820726	0.430151	-0.932059
Arabidopsis	root vs. shoot	AT5G03800	0.175262	0.0142253	0.246421	4.38863	1.30971	-1.74452
Arabidopsis	root vs. shoot	AT3G24820	0.0720579	0.014329	0.246421	7.16811	3.15138	-1.18561
Arabidopsis	root vs. shoot	AT5G35680	0.0252314	0.0142379	0.246421	4.54485	2.86465	-0.665874
Arabidopsis	root vs. shoot	AT1G18690	0.0750664	0.014295	0.246421	4.69405	2.02096	-1.21579
Arabidopsis	root vs. shoot	AT4G04760	0.378043	0.0143054	0.246421	7.83632	1.24606	-2.6528
Arabidopsis	root vs. shoot	AT1G54160	0.925237	0.0143186	0.246421	8.23726	0.413721	-4.31543
Arabidopsis	root vs. shoot	AT1G69020	0.31437	0.0142457	0.246421	2.09859	10.9936	2.38916
Arabidopsis	root vs. shoot	AT3G26030	0.0147008	0.0143214	0.246421	2.20479	1.5398	-0.517904
Arabidopsis	root vs. shoot	AT1G13710	0.421739	0.0143515	0.246515	108.775	7.01792	-3.95416
Arabidopsis	root vs. shoot	AT3G44450	0.0668644	0.0143657	0.246559	9.03583	4.08514	-1.14527
Arabidopsis	root vs. shoot	AT3G01140	0.492591	0.0144679	0.247894	0.0590144	0.567722	3.26605
Arabidopsis	root vs. shoot	AT1G25275	0.0222114	0.0144786	0.247894	7.0237	4.50105	-0.641971
Arabidopsis	root vs. shoot	AT2G21630	0.149645	0.0144569	0.247894	1.84557	5.76043	1.64211
Arabidopsis	root vs. shoot	AT5G18370	0.0584535	0.0145564	0.249025	2.99668	1.45078	-1.04654
Arabidopsis	root vs. shoot	AT1G60240	2.08889	0.0146776	0.250894	16.9143	0.108365	-7.2862
Arabidopsis	root vs. shoot	AT3G18300	0.345798	0.0147757	0.252368	4.78068	0.572309	-3.06235
Arabidopsis	root vs. shoot	AT3G61770	0.0330147	0.0147953	0.252481	3.308	5.67546	0.77878
Arabidopsis	root vs. shoot	AT2G36410	0.0175323	0.0148062	0.252481	6.34888	4.19527	-0.597736
Arabidopsis	root vs. shoot	AT4G16880	1.16083	0.0148272	0.252635	26.7991	0.982479	-4.76961
Arabidopsis	root vs. shoot	AT4G18500	2.02407	0.0148426	0.252694	0.234622	3.09924	3.7235
Arabidopsis	root vs. shoot	AT5G10370	0.0927955	0.0148816	0.252927	1.14677	2.80714	1.29153
Arabidopsis	root vs. shoot	AT4G10510	1.17051	0.0148909	0.252927	0.850895	29.2408	5.10286
Arabidopsis	root vs. shoot	AT1G27090	0.0132445	0.0148921	0.252927	4.64471	6.47909	0.480205
Arabidopsis	root vs. shoot	AT4G33120	0.0835691	0.0149857	0.254112	5.73163	15.8	1.4629
Arabidopsis	root vs. shoot	AT4G18350	1.45728	0.0149861	0.254112	14.5329	0.19758	-6.20074
Arabidopsis	root vs. shoot	AT3G14190	0.036799	0.0149979	0.254112	9.28767	5.23385	-0.827443
Arabidopsis	root vs. shoot	AT5G35320	0.0898065	0.0150167	0.254227	2.12317	0.880337	-1.27009
Arabidopsis	root vs. shoot	AT5G65685	0.183746	0.015091	0.254799	0.623512	2.13602	1.77644
Arabidopsis	root vs. shoot	AT5G23380	0.333998	0.0150987	0.254799	0.430106	2.40152	2.48119
Arabidopsis	root vs. shoot	AT4G28640	0.0562811	0.0150698	0.254799	2.30926	4.72651	1.03335
Arabidopsis	root vs. shoot	AT5G54560	1.28304	0.0150917	0.254799	0.596989	8.4406	3.82157
Arabidopsis	root vs. shoot	AT1G34580	0.323232	0.0151675	0.255553	8.0156	1.45285	-2.46393
Arabidopsis	root vs. shoot	AT1G35430	0.589816	0.0151579	0.255553	0.945911	0.0838274	-3.49621
Arabidopsis	root vs. shoot	AT4G31870	0.216524	0.0152143	0.256138	0.709619	5.02741	2.8247
Arabidopsis	root vs. shoot	AT1G48350	0.0170325	0.0153594	0.258375	7.0491	4.78993	-0.557434
Arabidopsis	root vs. shoot	AT5G44350	0.0852254	0.0153842	0.258586	3.94697	11.2261	1.50804
Arabidopsis	root vs. shoot	AT2G47890	0.0693239	0.0154214	0.259005	2.44933	5.75806	1.23319
Arabidopsis	root vs. shoot	AT5G60940	0.0619019	0.0154516	0.259308	2.57032	1.24389	-1.04709
Arabidopsis	root vs. shoot	AT2G21540	0.0186681	0.0154976	0.259873	2.61169	3.91373	0.583563
Arabidopsis	root vs. shoot	AT1G08810	0.191628	0.0155127	0.25992	1.13837	4.84748	2.09026
Arabidopsis	root vs. shoot	AT2G17600	6.0818	0.0155519	0.260343	0.128832	4.5703	5.14873
Arabidopsis	root vs. shoot	AT1G18650	0.0529073	0.0155625	0.260343	7.44913	3.71261	-1.00464
Arabidopsis	root vs. shoot	AT4G32430	0.437892	0.0155803	0.260434	0.279027	2.0454	2.8739
Arabidopsis	root vs. shoot	AT5G44520	0.0647495	0.0157171	0.262515	1.29905	2.80856	1.11237
Arabidopsis	root vs. shoot	AT1G20020	0.0487374	0.0157487	0.262834	10.1733	5.33861	-0.930249
Arabidopsis	root vs. shoot	AT5G51210	0.708095	0.0157787	0.263127	0.103026	1.89147	4.19842
Arabidopsis	root vs. shoot	AT1G54820	0.13209	0.0158123	0.263481	8.90882	3.02883	-1.55648
Arabidopsis	root vs. shoot	AT2G01290	0.03045	0.0158283	0.263539	14.536	8.37638	-0.795231
Arabidopsis	root vs. shoot	AT5G11040	0.0108292	0.0158605	0.263869	2.37996	3.21909	0.435716
Arabidopsis	root vs. shoot	AT1G33870	1.16596	0.0158949	0.264082	3.42982	23.1364	2.75396
Arabidopsis	root vs. shoot	AT4G38680	0.0247123	0.0158984	0.264082	3.97813	6.19536	0.639097
Arabidopsis	root vs. shoot	AT2G03550	0.106673	0.0159289	0.264383	33.3441	6.76112	-2.3021
Arabidopsis	root vs. shoot	AT5G47050	0.0391312	0.0159764	0.264836	1.06442	1.88575	0.825065
Arabidopsis	root vs. shoot	AT5G24655	2.41813	0.0159813	0.264836	0.166215	2.89118	4.12054
Arabidopsis	root vs. shoot	AT1G04570	0.544445	0.0160172	0.265161	0.518575	5.18377	3.32138
Arabidopsis	root vs. shoot	AT1G07410	0.275071	0.0160259	0.265161	29.0919	133.918	2.20266
Arabidopsis	root vs. shoot	AT5G24190	1.42922	0.0160778	0.265811	1.84445	16.1148	3.12712
Arabidopsis	root vs. shoot	AT4G35200	0.112177	0.0161602	0.266966	3.64164	0.209211	-4.12156
Arabidopsis	root vs. shoot	AT5G49220	0.0252929	0.01619	0.267249	6.11239	3.80471	-0.683951
Arabidopsis	root vs. shoot	AT1G14040	0.0547358	0.0162368	0.267812	3.49624	1.77847	-0.975167
Arabidopsis	root vs. shoot	AT5G18020	0.637257	0.0163035	0.268703	46.5205	3.8126	-3.60902
Arabidopsis	root vs. shoot	AT4G17245	0.317645	0.0163502	0.269054	0.534149	3.26426	2.61144
Arabidopsis	root vs. shoot	AT4G23710	0.0148897	0.016346	0.269054	7.62347	5.37297	-0.504727
Arabidopsis	root vs. shoot	AT3G23870	0.315887	0.0164338	0.270112	2.56385	16.5834	2.69335
Arabidopsis	root vs. shoot	AT1G60080	0.0320086	0.016446	0.270112	3.02363	5.14525	0.766961
Arabidopsis	root vs. shoot	AT5G40040	0.919567	0.0164656	0.270112	0.433292	9.67595	4.48099
Arabidopsis	root vs. shoot	AT5G24940	1.3097	0.0164549	0.270112	4.02997	29.9189	2.89222
Arabidopsis	root vs. shoot	AT4G03240	0.187353	0.016573	0.271664	1.83675	6.28339	1.77438
Arabidopsis	root vs. shoot	AT2G37240	0.0410985	0.0166292	0.271687	6.71739	3.63673	-0.885258
Arabidopsis	root vs. shoot	AT4G35010	0.724591	0.0166177	0.271687	4.94402	87.653	4.14805
Arabidopsis	root vs. shoot	AT5G53150	0.0347334	0.0166386	0.271687	3.44782	1.99439	-0.789739
Arabidopsis	root vs. shoot	AT1G60730	0.063922	0.0165876	0.271687	2.0839	4.34851	1.06124
Arabidopsis	root vs. shoot	AT2G20400	0.171928	0.0166187	0.271687	3.74167	1.12164	-1.73807
Arabidopsis	root vs. shoot	AT5G63170	2.02511	0.0166819	0.272184	7.74948	0.0804902	-6.58914
Arabidopsis	root vs. shoot	AT3G18230	0.0968462	0.0167582	0.273008	3.11128	7.45516	1.26073
Arabidopsis	root vs. shoot	AT3G47210	0.280764	0.0167469	0.273008	2.36683	18.7987	2.98961
Arabidopsis	root vs. shoot	AT4G36570	1.68906	0.0168328	0.274012	0.321184	3.28661	3.35513
Arabidopsis	root vs. shoot	AT4G12720	0.0162293	0.01686	0.274243	5.04056	3.46709	-0.539857
Arabidopsis	root vs. shoot	AT2G24430	0.329672	0.016944	0.275398	14.0035	1.55079	-3.17472
Arabidopsis	root vs. shoot	AT4G08160	0.0450616	0.0170251	0.276505	4.10406	7.85635	0.936809
Arabidopsis	root vs. shoot	AT2G22540	0.108661	0.0170641	0.276739	11.899	4.19662	-1.50355
Arabidopsis	root vs. shoot	AT1G21270	0.0723294	0.0170657	0.276739	9.67502	4.02343	-1.26584
Arabidopsis	root vs. shoot	AT1G23280	0.023101	0.0170954	0.277008	7.30422	11.3467	0.635473
Arabidopsis	root vs. shoot	AT3G57510	0.587361	0.0171754	0.2779	121.224	7.73006	-3.97105
Arabidopsis	root vs. shoot	AT1G78080	0.0981272	0.0171825	0.2779	0.511316	0.21011	-1.28307
Arabidopsis	root vs. shoot	AT2G07698	0.0174271	0.0171898	0.2779	1.81307	1.25393	-0.531978
Arabidopsis	root vs. shoot	AT5G42510	0.0488771	0.0172295	0.278328	3.4702	8.59725	1.30886
Arabidopsis	root vs. shoot	AT5G61150	0.0214881	0.0172732	0.27861	3.95733	6.01923	0.605052
Arabidopsis	root vs. shoot	AT2G25850	0.257584	0.0172679	0.27861	1.77367	7.37013	2.05495
Arabidopsis	root vs. shoot	AT3G49260	0.28641	0.017292	0.2787	12.6318	2.62381	-2.26732
Arabidopsis	root vs. shoot	AT5G04020	0.0229783	0.0173285	0.279076	3.41273	5.34175	0.646386
Arabidopsis	root vs. shoot	AT5G24690	0.0130952	0.0173523	0.279108	3.45858	4.77833	0.466328
Arabidopsis	root vs. shoot	AT5G50175	0.917719	0.0173797	0.279108	3.12312	0.407691	-2.93744
Arabidopsis	root vs. shoot	AT1G44000	0.113438	0.0173921	0.279108	2.50653	0.971932	-1.36676
Arabidopsis	root vs. shoot	AT2G41342	0.641498	0.0173962	0.279108	4.17538	0.18893	-4.46598
Arabidopsis	root vs. shoot	AT5G56220	0.0189504	0.0173964	0.279108	2.80562	4.17333	0.572882
Arabidopsis	root vs. shoot	AT1G18870	0.143295	0.0174637	0.279974	4.43987	13.0209	1.55224
Arabidopsis	root vs. shoot	AT4G02840	0.0219784	0.0174834	0.280006	4.79099	7.38218	0.623722
Arabidopsis	root vs. shoot	AT4G10010	2.90167	0.0175034	0.280006	0.382237	12.1097	4.98555
Arabidopsis	root vs. shoot	AT1G29270	0.418372	0.0175054	0.280006	3.16907	0.321876	-3.29948
Arabidopsis	root vs. shoot	AT1G77060	0.0687245	0.017519	0.280014	11.4826	5.07537	-1.17787
Arabidopsis	root vs. shoot	AT5G62790	0.0101533	0.0175336	0.280034	4.50773	6.00148	0.412917
Arabidopsis	root vs. shoot	AT1G01170	0.0316277	0.0175532	0.280136	5.69374	3.35162	-0.764519
Arabidopsis	root vs. shoot	AT5G58630	1.34982	0.0175787	0.280332	0.121525	4.91372	5.33749
Arabidopsis	root vs. shoot	AT5G21280	0.0500814	0.0176	0.280371	1.31476	2.50079	0.927583
Arabidopsis	root vs. shoot	AT1G79390	0.0254017	0.0176185	0.280371	7.03233	4.41137	-0.672778
Arabidopsis	root vs. shoot	AT5G47190	0.0189657	0.0176209	0.280371	7.68336	5.12166	-0.585125
Arabidopsis	root vs. shoot	AT1G55980	2.40799	0.01766	0.280782	2.95782	0.173365	-4.09265
Arabidopsis	root vs. shoot	AT2G43590	0.198991	0.0177254	0.281611	8.20355	2.24274	-1.87099
Arabidopsis	root vs. shoot	AT1G51870	0.0809757	0.0177861	0.282363	3.02684	7.22017	1.25422
Arabidopsis	root vs. shoot	AT5G61610	3.01429	0.0178157	0.28262	13.8926	0.804942	-4.10929
Arabidopsis	root vs. shoot	AT1G50570	0.145903	0.0179192	0.283527	3.28468	9.46424	1.52673
Arabidopsis	root vs. shoot	AT5G67070	0.0139241	0.0179214	0.283527	3.84644	5.40856	0.491721
Arabidopsis	root vs. shoot	AT2G01450	0.0165488	0.0179215	0.283527	3.33428	2.33174	-0.515967
Arabidopsis	root vs. shoot	AT5G13250	0.492622	0.0179264	0.283527	0.719825	5.41948	2.91244
Arabidopsis	root vs. shoot	AT4G14090	0.0614047	0.0179826	0.284203	17.6272	7.47848	-1.23699
Arabidopsis	root vs. shoot	AT5G49440	0.94995	0.018077	0.285321	0.117456	0.00618674	-4.2468
Arabidopsis	root vs. shoot	AT2G43880	0.36483	0.0180803	0.285321	5.52807	12.7917	1.21036
Arabidopsis	root vs. shoot	AT1G71710	0.0253193	0.0181066	0.285523	2.79837	4.40435	0.65434
Arabidopsis	root vs. shoot	AT5G28060	0.0126708	0.0181369	0.285788	6.63389	4.8629	-0.448039
Arabidopsis	root vs. shoot	AT5G43920	0.1165	0.0181522	0.285816	3.77667	1.42968	-1.40142
Arabidopsis	root vs. shoot	AT1G60000	0.0298367	0.0182017	0.286382	7.77704	4.51604	-0.784163
Arabidopsis	root vs. shoot	AT2G02160	0.0305835	0.0182404	0.286778	3.41009	5.56094	0.705517
Arabidopsis	root vs. shoot	AT2G20080	0.41109	0.018304	0.287565	2.02463	30.707	3.92284
Arabidopsis	root vs. shoot	AT4G39010	0.2191	0.0183317	0.287786	1.4539	5.84075	2.00623
Arabidopsis	root vs. shoot	AT1G71330	1.22698	0.0183594	0.288007	2.35168	0.0746633	-4.97715
Arabidopsis	root vs. shoot	AT3G03030	0.245055	0.0183909	0.288075	3.94472	0.971609	-2.02147
Arabidopsis	root vs. shoot	AT2G31480	0.422531	0.0183818	0.288075	5.73761	0.301448	-4.25047
Arabidopsis	root vs. shoot	AT3G54080	0.0161442	0.0184357	0.288417	10.4834	7.1547	-0.551139
Arabidopsis	root vs. shoot	AT1G22680	0.674435	0.0184401	0.288417	0.384514	5.60188	3.8648
Arabidopsis	root vs. shoot	AT3G15360	0.0191154	0.0184733	0.288637	9.73155	6.53954	-0.573482
Arabidopsis	root vs. shoot	AT1G28490	0.097641	0.0184814	0.288637	7.09344	17.1166	1.27084
Arabidopsis	root vs. shoot	AT4G24180	0.287318	0.0185024	0.288753	3.03179	0.302562	-3.32487
Arabidopsis	root vs. shoot	AT1G01180	0.0554989	0.0185576	0.288981	3.21039	1.62182	-0.985133
Arabidopsis	root vs. shoot	AT2G46430	0.081483	0.0186003	0.288981	2.86635	6.65499	1.21522
Arabidopsis	root vs. shoot	AT3G03920	0.0245663	0.0186053	0.288981	3.48721	5.39752	0.630223
Arabidopsis	root vs. shoot	AT2G47260	0.119958	0.0186341	0.288981	4.41166	1.55879	-1.50089
Arabidopsis	root vs. shoot	AT5G65550	1.01492	0.0185811	0.288981	0.144527	3.97017	4.7798
Arabidopsis	root vs. shoot	AT3G49740	0.197073	0.0186022	0.288981	2.00458	0.546893	-1.87397
Arabidopsis	root vs. shoot	AT4G01820	0.600532	0.01864	0.288981	3.8789	41.4116	3.41631
Arabidopsis	root vs. shoot	AT5G18910	0.385672	0.0186284	0.288981	2.34647	32.8098	3.80556
Arabidopsis	root vs. shoot	AT1G02670	0.495041	0.0186297	0.288981	0.779862	6.39186	3.03495
Arabidopsis	root vs. shoot	AT3G23710	0.27772	0.0186856	0.289476	4.39726	19.0338	2.11389
Arabidopsis	root vs. shoot	AT4G36880	0.0248223	0.0187718	0.290598	8.64633	5.51131	-0.649693
Arabidopsis	root vs. shoot	AT3G53820	1.62518	0.0188634	0.291591	17.7012	0.226086	-6.29083
Arabidopsis	root vs. shoot	AT1G03320	0.910992	0.0188602	0.291591	9.43497	3.79524	-1.31383
Arabidopsis	root vs. shoot	AT3G10450	0.156345	0.0189177	0.292217	11.0797	3.61013	-1.61779
Arabidopsis	root vs. shoot	AT2G33160	1.35948	0.0189503	0.292506	0.291971	11.8977	5.34871
Arabidopsis	root vs. shoot	AT5G08470	0.0228874	0.0189703	0.292602	2.23572	3.41834	0.612557
Arabidopsis	root vs. shoot	AT1G01630	0.0140674	0.018996	0.292784	3.21653	4.46714	0.473848
Arabidopsis	root vs. shoot	AT1G63720	0.386826	0.0190204	0.292948	2.75835	16.7588	2.60304
Arabidopsis	root vs. shoot	AT1G64190	0.0121754	0.0190763	0.293594	6.57117	8.92291	0.441364
Arabidopsis	root vs. shoot	AT1G52670	0.0222321	0.0191225	0.293665	5.15911	7.79847	0.596071
Arabidopsis	root vs. shoot	AT5G64813	0.0581084	0.0191028	0.293665	1.71254	3.35573	0.970485
Arabidopsis	root vs. shoot	AT5G02070	0.59978	0.0191187	0.293665	3.25972	0.339319	-3.26404
Arabidopsis	root vs. shoot	AT5G67110	0.138761	0.0191567	0.293977	2.52011	0.873643	-1.52837
Arabidopsis	root vs. shoot	AT2G37460	0.0221728	0.0191725	0.293996	4.59729	7.06715	0.620344
Arabidopsis	root vs. shoot	AT1G77260	0.0220097	0.0191857	0.293996	3.26794	4.95485	0.60046
Arabidopsis	root vs. shoot	AT5G13400	0.186146	0.0192322	0.294495	7.6736	2.2498	-1.7701
Arabidopsis	root vs. shoot	AT2G17350	0.118408	0.0192683	0.294683	2.38349	6.47648	1.44214
Arabidopsis	root vs. shoot	AT5G18280	0.0215673	0.0192723	0.294683	2.37263	3.55995	0.585371
Arabidopsis	root vs. shoot	AT5G11410	0.75442	0.0193687	0.295943	28.9162	1.87852	-3.94421
Arabidopsis	root vs. shoot	AT4G19100	0.0235873	0.0194008	0.296097	7.59036	4.43702	-0.774576
Arabidopsis	root vs. shoot	AT1G16680	0.0664864	0.0194068	0.296097	2.458	1.19244	-1.04357
Arabidopsis	root vs. shoot	AT2G25130	0.282651	0.0194842	0.297064	3.42942	29.2398	3.09189
Arabidopsis	root vs. shoot	AT3G62030	0.0127938	0.019513	0.297289	7.60434	5.55277	-0.453616
Arabidopsis	root vs. shoot	AT2G22795	0.0102728	0.0195895	0.298025	9.35395	12.4478	0.412245
Arabidopsis	root vs. shoot	AT4G29340	0.288631	0.0195841	0.298025	2.75086	16.9196	2.62074
Arabidopsis	root vs. shoot	AT4G19645	0.387596	0.0196744	0.298594	11.3714	1.91764	-2.56801
Arabidopsis	root vs. shoot	AT1G56590	0.0282673	0.0196974	0.298594	3.67006	2.29085	-0.67992
Arabidopsis	root vs. shoot	AT5G18660	0.0196895	0.0196472	0.298594	12.7132	7.89391	-0.687513
Arabidopsis	root vs. shoot	AT2G37670	0.114187	0.0196855	0.298594	1.54472	4.05992	1.3941
Arabidopsis	root vs. shoot	AT4G18970	0.075881	0.0196873	0.298594	10.1238	4.67424	-1.11495
Arabidopsis	root vs. shoot	AT1G17280	0.0223353	0.0197124	0.298607	4.76691	3.0987	-0.621393
Arabidopsis	root vs. shoot	AT5G39530	0.103827	0.0197602	0.298903	3.01825	1.22379	-1.30236
Arabidopsis	root vs. shoot	AT2G20495	0.137541	0.0197601	0.298903	2.50745	0.892217	-1.49075
Arabidopsis	root vs. shoot	AT5G36140	0.161739	0.0197884	0.299116	2.86385	21.3741	2.89983
Arabidopsis	root vs. shoot	AT3G14010	0.0231888	0.019805	0.299153	2.65788	4.06822	0.614124
Arabidopsis	root vs. shoot	AT2G43900	0.154035	0.0198194	0.299157	1.23253	0.411787	-1.58165
Arabidopsis	root vs. shoot	AT1G64230	0.0116563	0.0198678	0.299461	3.71056	5.00572	0.431941
Arabidopsis	root vs. shoot	AT1G54740	0.026062	0.0198634	0.299461	2.81472	4.50288	0.677853
Arabidopsis	root vs. shoot	AT2G25890	0.276183	0.0199045	0.299586	1.25567	7.40577	2.56019
Arabidopsis	root vs. shoot	AT3G21560	0.015481	0.0198952	0.299586	5.20871	7.36755	0.50026
Arabidopsis	root vs. shoot	AT2G24460	0.127484	0.0199297	0.299753	355.005	85.6385	-2.05151
Arabidopsis	root vs. shoot	AT1G24470	0.719096	0.0200585	0.300409	2.40706	0.21978	-3.45314
Arabidopsis	root vs. shoot	AT4G28630	0.0511579	0.0200422	0.300409	1.40048	2.65078	0.920494
Arabidopsis	root vs. shoot	AT5G20470	0.559002	0.0200272	0.300409	2.8936	56.1601	4.27861
Arabidopsis	root vs. shoot	AT2G43050	0.0864214	0.0200062	0.300409	4.99215	11.5234	1.20684
Arabidopsis	root vs. shoot	AT3G49190	0.0343244	0.0200554	0.300409	3.32452	0.983195	-1.7576
Arabidopsis	root vs. shoot	AT1G17250	0.296678	0.0199933	0.300409	2.76992	0.598339	-2.21081
Arabidopsis	root vs. shoot	AT3G29430	0.39305	0.0200788	0.300501	3.7773	9.53086	1.33525
Arabidopsis	root vs. shoot	AT1G31430	0.295551	0.0201811	0.301818	5.34874	26.6161	2.31503
Arabidopsis	root vs. shoot	AT5G08070	1.97892	0.0201971	0.301844	6.60188	0.959758	-2.78214
Arabidopsis	root vs. shoot	AT5G63150	0.0403051	0.0202348	0.302195	4.39229	2.47609	-0.826912
Arabidopsis	root vs. shoot	AT1G58520	0.0497871	0.0202597	0.302352	2.06673	1.11444	-0.891029
Arabidopsis	root vs. shoot	AT5G39600	0.0256387	0.0203143	0.302633	6.7647	4.26435	-0.665699
Arabidopsis	root vs. shoot	AT2G42330	0.289636	0.0203214	0.302633	4.1477	0.869304	-2.25438
Arabidopsis	root vs. shoot	AT1G33120	0.0113142	0.0203032	0.302633	9.63168	7.17826	-0.424153
Arabidopsis	root vs. shoot	AT5G64050	0.00964197	0.0203485	0.302823	4.20638	5.54658	0.399019
Arabidopsis	root vs. shoot	AT3G09140	4.18543	0.0203647	0.302852	0.353252	0.000563912	-9.29101
Arabidopsis	root vs. shoot	AT3G44120	1.08925	0.0203997	0.302945	0.659108	9.47635	3.84575
Arabidopsis	root vs. shoot	AT3G48400	0.16695	0.020414	0.302945	2.25649	10.4319	2.20885
Arabidopsis	root vs. shoot	AT3G02390	2.04807	0.0203956	0.302945	0.36198	4.53743	3.64789
Arabidopsis	root vs. shoot	AT4G36220	0.0131432	0.0204555	0.303349	6.3758	4.66564	-0.450531
Arabidopsis	root vs. shoot	AT5G46880	0.371907	0.0204997	0.303792	18.9588	2.61001	-2.86074
Arabidopsis	root vs. shoot	AT1G64330	0.0195547	0.0205351	0.304103	8.84713	13.4055	0.599546
Arabidopsis	root vs. shoot	AT2G16790	0.0310388	0.0205754	0.304487	4.73367	2.76857	-0.773815
Arabidopsis	root vs. shoot	AT1G74070	0.164476	0.020655	0.3053	1.42956	4.84939	1.76223
Arabidopsis	root vs. shoot	AT2G22330	0.0207931	0.0206592	0.3053	3.36888	5.00363	0.570709
Arabidopsis	root vs. shoot	AT4G09450	1.40832	0.0207061	0.30578	2.14753	0.0613085	-5.13045
Arabidopsis	root vs. shoot	AT4G13500	0.339017	0.0208621	0.30744	18.1296	3.07274	-2.56075
Arabidopsis	root vs. shoot	AT5G08010	0.331287	0.0208512	0.30744	2.41203	11.5833	2.26373
Arabidopsis	root vs. shoot	AT4G22340	0.0733374	0.0208349	0.30744	5.38525	2.52147	-1.09475
Arabidopsis	root vs. shoot	AT3G48610	0.0241521	0.020914	0.30799	5.30216	3.4408	-0.623838
Arabidopsis	root vs. shoot	AT2G45030	0.0149409	0.0209396	0.308153	3.51474	4.96374	0.498009
Arabidopsis	root vs. shoot	AT3G19870	0.0265181	0.0209786	0.308512	1.92735	1.22865	-0.649552
Arabidopsis	root vs. shoot	AT2G41410	0.0149189	0.0209966	0.308546	4.50197	3.22304	-0.482136
Arabidopsis	root vs. shoot	AT2G36810	0.0210364	0.02101	0.308546	2.61693	1.75894	-0.573171
Arabidopsis	root vs. shoot	AT3G09270	0.0222959	0.0210282	0.308598	5.40747	3.49308	-0.630454
Arabidopsis	root vs. shoot	AT3G04000	0.132863	0.0210847	0.309068	23.9334	6.57897	-1.86309
Arabidopsis	root vs. shoot	AT4G12980	0.0329595	0.0210894	0.309068	5.9032	3.50463	-0.752236
Arabidopsis	root vs. shoot	AT1G67280	0.0157292	0.0211318	0.309475	4.59141	6.50944	0.503597
Arabidopsis	root vs. shoot	AT5G43540	0.144465	0.0212317	0.310723	2.92635	0.72123	-2.02057
Arabidopsis	root vs. shoot	AT1G56280	0.0210008	0.0214398	0.310786	1.01002	1.49904	0.569647
Arabidopsis	root vs. shoot	AT4G00710	0.0124767	0.0212934	0.310786	2.93709	2.16314	-0.441258
Arabidopsis	root vs. shoot	AT3G15650	0.0599186	0.0214416	0.310786	9.70701	20.2539	1.0611
Arabidopsis	root vs. shoot	AT5G19630	0.0750252	0.0213715	0.310786	2.41456	5.20079	1.10697
Arabidopsis	root vs. shoot	AT3G12100	0.0777087	0.0214262	0.310786	1.0652	2.32126	1.12379
Arabidopsis	root vs. shoot	AT3G23450	0.0590136	0.0214015	0.310786	9.19913	18.6723	1.02133
Arabidopsis	root vs. shoot	AT5G46170	0.0235505	0.0214264	0.310786	3.87005	2.51443	-0.62212
Arabidopsis	root vs. shoot	AT1G75010	0.0419456	0.0214	0.310786	1.3681	2.43832	0.833718
Arabidopsis	root vs. shoot	AT4G04910	0.00948061	0.0214409	0.310786	3.89871	5.08911	0.384418
Arabidopsis	root vs. shoot	AT5G02780	0.109158	0.0212699	0.310786	4.45157	11.8742	1.41544
Arabidopsis	root vs. shoot	AT5G40600	0.0546414	0.0212734	0.310786	4.51598	2.30792	-0.96845
Arabidopsis	root vs. shoot	AT5G47920	0.423327	0.0213194	0.310786	5.01418	0.245476	-4.35236
Arabidopsis	root vs. shoot	AT4G00220	0.978311	0.0213106	0.310786	0.590194	9.82426	4.05709
Arabidopsis	root vs. shoot	AT3G50840	0.110508	0.0214117	0.310786	0.145045	0.0591864	-1.29316
Arabidopsis	root vs. shoot	AT2G23600	0.0406394	0.0215573	0.312248	4.87947	2.82839	-0.786746
Arabidopsis	root vs. shoot	AT5G07060	0.709397	0.0216218	0.312969	5.75472	74.5012	3.69445
Arabidopsis	root vs. shoot	AT4G39840	0.020097	0.0216711	0.313407	7.11709	10.4692	0.556794
Arabidopsis	root vs. shoot	AT3G51150	0.0996908	0.0216817	0.313407	3.5416	1.48217	-1.25669
Arabidopsis	root vs. shoot	AT4G38950	0.0331941	0.0217841	0.313816	1.81516	1.11061	-0.708743
Arabidopsis	root vs. shoot	AT5G26930	1.2411	0.0217805	0.313816	5.29599	0.43284	-3.61299
Arabidopsis	root vs. shoot	AT5G48870	0.0418366	0.0217777	0.313816	9.32266	5.28289	-0.819414
Arabidopsis	root vs. shoot	AT3G20590	0.142392	0.021728	0.313816	5.79047	1.09522	-2.40246
Arabidopsis	root vs. shoot	AT1G18320	2.98177	0.0217809	0.313816	3.48505	0.156272	-4.47905
Arabidopsis	root vs. shoot	AT5G57710	0.0262752	0.0218365	0.314356	2.76135	4.28736	0.634713
Arabidopsis	root vs. shoot	AT1G22180	0.0617385	0.0218677	0.314592	2.9002	1.36756	-1.08455
Arabidopsis	root vs. shoot	AT5G25750	0.737632	0.0219262	0.315219	2.25816	0.408437	-2.46697
Arabidopsis	root vs. shoot	AT1G23560	0.188302	0.0220564	0.31666	1.8283	6.69984	1.87362
Arabidopsis	root vs. shoot	AT1G28050	0.108349	0.0220462	0.31666	2.76562	6.93271	1.32582
Arabidopsis	root vs. shoot	AT5G58320	0.0346359	0.0221112	0.317087	5.65608	3.3513	-0.755082
Arabidopsis	root vs. shoot	AT2G43680	0.0164056	0.0221161	0.317087	1.80863	2.56754	0.505489
Arabidopsis	root vs. shoot	AT5G06780	0.0303251	0.0221753	0.317505	4.88876	8.08974	0.726624
Arabidopsis	root vs. shoot	AT4G38080	0.0846023	0.0221641	0.317505	9.17814	31.4113	1.77501
Arabidopsis	root vs. shoot	AT2G26910	0.0732181	0.0221993	0.317635	4.44854	2.14944	-1.04937
Arabidopsis	root vs. shoot	AT5G61940	0.144669	0.0223045	0.318279	74.1232	23.9427	-1.63034
Arabidopsis	root vs. shoot	AT3G02830	0.0349781	0.0222933	0.318279	2.13867	1.28431	-0.735723
Arabidopsis	root vs. shoot	AT4G21310	0.126855	0.0223022	0.318279	7.38351	2.64274	-1.48227
Arabidopsis	root vs. shoot	AT5G65690	0.0276013	0.0222846	0.318279	4.1247	6.9748	0.757862
Arabidopsis	root vs. shoot	AT5G15210	0.0661383	0.0223327	0.318467	6.38786	3.11137	-1.03778
Arabidopsis	root vs. shoot	AT3G44326	0.166489	0.0224207	0.319503	2.46371	8.84482	1.844
Arabidopsis	root vs. shoot	AT5G23430	0.0366194	0.0224355	0.319503	1.92406	3.26781	0.764173
Arabidopsis	root vs. shoot	AT1G33610	0.0665234	0.0224901	0.31967	2.91666	6.1484	1.0759
Arabidopsis	root vs. shoot	AT3G53100	0.0302963	0.0224843	0.31967	5.12433	3.14577	-0.703948
Arabidopsis	root vs. shoot	AT1G26150	0.101938	0.0225077	0.31967	2.52084	1.05827	-1.25219
Arabidopsis	root vs. shoot	AT2G38870	0.0260537	0.0224942	0.31967	4.63248	2.9942	-0.629616
Arabidopsis	root vs. shoot	AT1G60360	0.394482	0.0226468	0.321214	1.83533	13.1666	2.84277
Arabidopsis	root vs. shoot	AT4G24230	0.0437324	0.0226348	0.321214	4.9151	9.34348	0.926738
Arabidopsis	root vs. shoot	AT3G58010	0.0697129	0.0227112	0.321488	2.27226	4.75465	1.06521
Arabidopsis	root vs. shoot	AT2G02170	0.0210062	0.0226923	0.321488	5.90058	3.91033	-0.593566
Arabidopsis	root vs. shoot	AT5G18790	0.0504519	0.0227117	0.321488	2.50607	4.64871	0.891402
Arabidopsis	root vs. shoot	AT5G45440	0.0711753	0.0227805	0.322247	3.98329	9.61475	1.27129
Arabidopsis	root vs. shoot	AT1G56500	0.012256	0.0228548	0.323081	5.24719	3.82123	-0.457508
Arabidopsis	root vs. shoot	AT4G27560	0.275003	0.0229868	0.323866	4.99602	20.3344	2.02507
Arabidopsis	root vs. shoot	AT5G42530	0.257524	0.0229612	0.323866	13.9139	2.99022	-2.2182
Arabidopsis	root vs. shoot	AT1G22150	0.160664	0.0229727	0.323866	8.56559	2.72639	-1.65156
Arabidopsis	root vs. shoot	AT3G58070	0.863609	0.0229642	0.323866	59.9185	2.37502	-4.65699
Arabidopsis	root vs. shoot	AT5G42480	0.0224398	0.0229854	0.323866	2.82314	4.26738	0.59605
Arabidopsis	root vs. shoot	AT1G09240	0.72883	0.0230168	0.324073	56.251	4.13749	-3.76505
Arabidopsis	root vs. shoot	AT4G00230	0.0322518	0.0230978	0.324997	4.53332	2.78148	-0.704715
Arabidopsis	root vs. shoot	AT1G54060	0.0361045	0.0231291	0.325222	3.44722	5.86901	0.767684
Arabidopsis	root vs. shoot	AT1G45015	0.0897475	0.0232561	0.326666	5.49406	14.9767	1.44677
Arabidopsis	root vs. shoot	AT4G34620	0.0180762	0.0232627	0.326666	4.42372	3.08894	-0.518147
Arabidopsis	root vs. shoot	AT1G22065	0.446541	0.0233507	0.326864	4.71217	0.401106	-3.55434
Arabidopsis	root vs. shoot	AT3G14510	2.10516	0.0233695	0.326864	0.115878	8.52885	6.20167
Arabidopsis	root vs. shoot	AT5G07330	0.556689	0.0233389	0.326864	0.662791	5.3976	3.02569
Arabidopsis	root vs. shoot	AT5G18640	0.0674483	0.0233248	0.326864	3.74455	1.81646	-1.04367
Arabidopsis	root vs. shoot	AT5G05200	0.0196758	0.0233323	0.326864	2.24544	3.29512	0.553334
Arabidopsis	root vs. shoot	AT1G77700	0.0837808	0.0233545	0.326864	5.0709	11.3493	1.16229
Arabidopsis	root vs. shoot	AT1G62940	1.49483	0.0233895	0.326918	4.25862	28.2187	2.72819
Arabidopsis	root vs. shoot	AT3G27270	0.490623	0.0234042	0.326918	0.669943	4.53751	2.75979
Arabidopsis	root vs. shoot	AT2G46110	0.0599489	0.0235052	0.327895	8.24331	4.03481	-1.03072
Arabidopsis	root vs. shoot	AT4G27700	0.0382324	0.0235741	0.327895	6.80726	3.94949	-0.785408
Arabidopsis	root vs. shoot	AT5G28500	0.0786883	0.0235827	0.327895	18.3781	8.27553	-1.15107
Arabidopsis	root vs. shoot	AT2G26975	0.151006	0.0235279	0.327895	6.80652	2.28958	-1.57183
Arabidopsis	root vs. shoot	AT3G07050	0.0120882	0.0235776	0.327895	3.59064	4.82265	0.425585
Arabidopsis	root vs. shoot	AT1G72660	0.263443	0.0235799	0.327895	18.5138	4.30309	-2.10516
Arabidopsis	root vs. shoot	AT1G29600	1.17269	0.0235217	0.327895	0.923887	31.3734	5.08568
Arabidopsis	root vs. shoot	AT1G27370	0.592616	0.0236229	0.328239	1.4896	0.177816	-3.06646
Arabidopsis	root vs. shoot	AT3G25510	0.260442	0.0236691	0.328665	0.813969	3.41151	2.06736
Arabidopsis	root vs. shoot	AT2G34910	0.150801	0.0237288	0.329223	4.53765	13.8952	1.61457
Arabidopsis	root vs. shoot	AT1G34430	0.0152736	0.0237525	0.329223	6.44668	8.98712	0.479301
Arabidopsis	root vs. shoot	AT5G08000	0.241009	0.023756	0.329223	35.2835	6.18117	-2.51304
Arabidopsis	root vs. shoot	AT3G50770	1.41644	0.0238177	0.32968	2.7512	0.0810479	-5.08514
Arabidopsis	root vs. shoot	AT1G32860	0.107516	0.0238357	0.32968	4.78612	12.0894	1.33682
Arabidopsis	root vs. shoot	AT4G12360	0.809597	0.0238281	0.32968	4.47556	16.3215	1.86663
Arabidopsis	root vs. shoot	AT2G39260	0.0206157	0.0238618	0.329826	2.67455	3.93682	0.557737
Arabidopsis	root vs. shoot	AT3G21310	1.14458	0.0238804	0.329868	0.443693	2.62252	2.56332
Arabidopsis	root vs. shoot	AT1G78270	0.0879958	0.0239131	0.330104	1.08746	2.46367	1.17985
Arabidopsis	root vs. shoot	AT4G02425	0.132763	0.0239598	0.330532	7.15307	2.54195	-1.49263
Arabidopsis	root vs. shoot	AT3G59870	0.0676586	0.0239846	0.330659	2.21715	4.52262	1.02845
Arabidopsis	root vs. shoot	AT1G02430	0.810125	0.0240138	0.330681	3.43001	0.270598	-3.66399
Arabidopsis	root vs. shoot	AT4G18210	0.299517	0.0240174	0.330681	0.640595	3.54758	2.46935
Arabidopsis	root vs. shoot	AT2G36420	0.0649531	0.0240441	0.330834	1.266	2.56251	1.01728
Arabidopsis	root vs. shoot	AT3G13674	0.106766	0.0240625	0.330871	6.54962	2.59051	-1.33817
Arabidopsis	root vs. shoot	AT5G64970	0.0436614	0.0241296	0.331578	5.44256	2.99755	-0.860504
Arabidopsis	root vs. shoot	AT5G18250	0.149911	0.0241726	0.331739	2.04351	5.97135	1.547
Arabidopsis	root vs. shoot	AT1G21640	0.030638	0.0241617	0.331739	1.76289	2.80675	0.670956
Arabidopsis	root vs. shoot	AT2G46030	0.015543	0.0243222	0.333345	5.05062	3.57628	-0.498001
Arabidopsis	root vs. shoot	AT5G46250	0.047257	0.0243376	0.333345	1.04673	1.87794	0.843263
Arabidopsis	root vs. shoot	AT2G38170	0.0237695	0.0243527	0.333345	6.50272	4.33449	-0.585182
Arabidopsis	root vs. shoot	AT5G44160	0.0679483	0.0243434	0.333345	6.1226	13.0729	1.09437
Arabidopsis	root vs. shoot	AT3G19120	0.0323969	0.0243959	0.33372	3.98709	6.56955	0.720458
Arabidopsis	root vs. shoot	AT1G50500	0.123404	0.0244182	0.33381	4.14734	10.4246	1.32973
Arabidopsis	root vs. shoot	AT1G27180	0.0849585	0.024549	0.335381	2.19425	0.986121	-1.15389
Arabidopsis	root vs. shoot	AT2G28160	1.00525	0.0245676	0.335419	2.62219	41.2083	3.97409
Arabidopsis	root vs. shoot	AT2G29620	0.089532	0.0246017	0.335668	4.69647	1.78644	-1.39449
Arabidopsis	root vs. shoot	AT4G22200	0.0338976	0.0246441	0.335814	7.59622	4.43195	-0.77734
Arabidopsis	root vs. shoot	AT1G73780	0.676642	0.0246399	0.335814	5.85113	0.330121	-4.14765
Arabidopsis	root vs. shoot	AT3G43540	0.03866	0.0246773	0.336049	3.10953	5.39072	0.793783
Arabidopsis	root vs. shoot	AT1G22880	0.166172	0.0247149	0.336345	2.18001	0.729699	-1.57896
Arabidopsis	root vs. shoot	AT3G48720	0.250591	0.0247896	0.337144	18.1594	4.36484	-2.05671
Arabidopsis	root vs. shoot	AT3G48030	0.0443318	0.0248513	0.337767	2.30605	1.30889	-0.81708
Arabidopsis	root vs. shoot	AT3G20810	0.822063	0.0248841	0.337961	6.38567	0.529696	-3.5916
Arabidopsis	root vs. shoot	AT5G02540	0.0513115	0.0248975	0.337961	8.28414	4.23483	-0.968048
Arabidopsis	root vs. shoot	AT5G18040	0.17475	0.0249413	0.338339	2.80303	0.875225	-1.67926
Arabidopsis	root vs. shoot	AT4G28050	0.025818	0.0249763	0.338379	3.55044	5.48287	0.626933
Arabidopsis	root vs. shoot	AT1G10657	0.133867	0.0249721	0.338379	0.686969	3.47935	2.3405
Arabidopsis	root vs. shoot	AT3G45390	0.396667	0.0250129	0.338442	3.95113	0.647666	-2.60894
Arabidopsis	root vs. shoot	AT1G01130	0.276739	0.0250032	0.338442	0.858414	3.58801	2.06344
Arabidopsis	root vs. shoot	AT3G06530	0.00919717	0.0251246	0.339736	3.27713	2.54617	-0.364108
Arabidopsis	root vs. shoot	AT5G44575	0.889689	0.025175	0.339767	3.9486	0.215684	-4.19435
Arabidopsis	root vs. shoot	AT5G44680	0.12341	0.0251476	0.339767	12.398	4.32785	-1.51838
Arabidopsis	root vs. shoot	AT2G12550	0.180037	0.0251729	0.339767	3.82938	11.9052	1.63641
Arabidopsis	root vs. shoot	AT1G63700	0.0258579	0.0253623	0.340621	1.38586	0.897938	-0.626095
Arabidopsis	root vs. shoot	AT2G21320	0.0780409	0.0253405	0.340621	5.6233	2.5713	-1.12892
Arabidopsis	root vs. shoot	AT4G00860	0.0148031	0.0253619	0.340621	4.177	3.02617	-0.464974
Arabidopsis	root vs. shoot	AT1G75460	0.0309377	0.0253832	0.340621	6.60459	3.64372	-0.85806
Arabidopsis	root vs. shoot	AT1G21880	0.0330421	0.0253039	0.340621	4.0684	6.65992	0.711045
Arabidopsis	root vs. shoot	AT4G26840	0.0234654	0.0253341	0.340621	6.48949	9.79832	0.59443
Arabidopsis	root vs. shoot	AT3G27025	0.989491	0.0253539	0.340621	0.155317	3.11622	4.32651
Arabidopsis	root vs. shoot	AT2G39520	4.34888	0.025369	0.340621	0.0645804	2.63868	5.35258
Arabidopsis	root vs. shoot	AT4G08700	0.456173	0.0253585	0.340621	2.92735	0.46035	-2.66879
Arabidopsis	root vs. shoot	AT5G60980	0.0113397	0.0255451	0.342577	4.11897	5.4789	0.411604
Arabidopsis	root vs. shoot	AT3G19020	0.452205	0.0255944	0.34302	1.61875	0.232049	-2.80237
Arabidopsis	root vs. shoot	AT4G10550	0.147231	0.0256312	0.343296	3.17917	1.15335	-1.46282
Arabidopsis	root vs. shoot	AT5G49960	0.255851	0.0256675	0.343565	2.01868	7.64184	1.92051
Arabidopsis	root vs. shoot	AT5G12890	0.068026	0.0256948	0.343712	12.7738	6.0183	-1.08576
Arabidopsis	root vs. shoot	AT3G04680	0.021176	0.0257131	0.34374	2.22854	3.31928	0.57477
Arabidopsis	root vs. shoot	AT1G56520	0.491769	0.0257603	0.343936	31.1178	2.88137	-3.43291
Arabidopsis	root vs. shoot	AT1G01750	0.0403841	0.0257462	0.343936	7.20513	4.06385	-0.826177
Arabidopsis	root vs. shoot	AT2G02510	0.0166908	0.0257963	0.3442	3.08345	2.17867	-0.501096
Arabidopsis	root vs. shoot	AT1G66950	0.322417	0.0258417	0.344282	6.76201	1.30134	-2.37746
Arabidopsis	root vs. shoot	AT4G31520	0.972669	0.0258334	0.344282	12.0089	0.762557	-3.97712
Arabidopsis	root vs. shoot	AT4G09900	0.26399	0.0258675	0.344282	17.5212	3.46844	-2.33674
Arabidopsis	root vs. shoot	AT5G03830	0.604931	0.0258612	0.344282	1.86061	0.22198	-3.06728
Arabidopsis	root vs. shoot	AT4G08470	0.174508	0.0258922	0.344372	1.39059	0.463626	-1.58466
Arabidopsis	root vs. shoot	AT2G36970	0.395171	0.0259068	0.344372	22.5237	3.49676	-2.68736
Arabidopsis	root vs. shoot	AT2G41000	0.317294	0.0260144	0.345585	0.892156	0.180511	-2.30521
Arabidopsis	root vs. shoot	AT5G59750	0.0585327	0.0260927	0.345973	5.64395	2.9213	-0.950094
Arabidopsis	root vs. shoot	AT1G73690	0.441099	0.0260843	0.345973	1.14116	6.71509	2.5569
Arabidopsis	root vs. shoot	AT1G67330	0.0479096	0.0260723	0.345973	4.47584	8.05673	0.848035
Arabidopsis	root vs. shoot	AT1G42550	0.0213845	0.0261541	0.346291	5.25995	7.98359	0.601989
Arabidopsis	root vs. shoot	AT5G65670	0.0106584	0.0261608	0.346291	3.06508	4.01354	0.388951
Arabidopsis	root vs. shoot	AT3G55550	0.926793	0.0261657	0.346291	5.5283	81.5672	3.88308
Arabidopsis	root vs. shoot	AT5G52220	0.126682	0.0262046	0.346588	5.10643	1.9185	-1.41234
Arabidopsis	root vs. shoot	AT1G05577	1.65126	0.0262919	0.347526	1.68536	63.6367	5.23873
Arabidopsis	root vs. shoot	AT1G15010	1.82555	0.0263921	0.348056	4.64923	0.0532729	-6.44745
Arabidopsis	root vs. shoot	AT4G39550	0.159968	0.0264299	0.348056	1.21977	3.73776	1.61557
Arabidopsis	root vs. shoot	AT2G37730	0.642891	0.0263955	0.348056	98.587	8.15399	-3.59582
Arabidopsis	root vs. shoot	AT5G16810	0.217518	0.0263599	0.348056	2.45365	8.35087	1.767
Arabidopsis	root vs. shoot	AT5G42520	0.0320303	0.0264307	0.348056	2.1458	3.49315	0.703015
Arabidopsis	root vs. shoot	AT4G00240	0.302315	0.0263998	0.348056	1.82554	7.87281	2.10856
Arabidopsis	root vs. shoot	AT5G41740	1.60596	0.0264893	0.34861	2.30513	0.0669703	-5.10518
Arabidopsis	root vs. shoot	AT3G21720	0.0536896	0.026512	0.348693	8.17247	4.49683	-0.861865
Arabidopsis	root vs. shoot	AT5G43190	0.105017	0.0265583	0.349085	1.88988	4.59702	1.2824
Arabidopsis	root vs. shoot	AT4G18150	1.10388	0.0266054	0.349487	3.72576	83.6504	4.48877
Arabidopsis	root vs. shoot	AT1G01320	0.0491828	0.026695	0.350229	5.56555	3.13716	-0.827066
Arabidopsis	root vs. shoot	AT3G14370	0.0530515	0.0266906	0.350229	1.8749	3.5623	0.925995
Arabidopsis	root vs. shoot	AT5G18080	0.665934	0.0267288	0.350456	0.495652	2.04131	2.04209
Arabidopsis	root vs. shoot	AT1G44030	0.941196	0.0267805	0.350916	4.33746	16.5938	1.93572
Arabidopsis	root vs. shoot	AT4G01900	0.0179402	0.026839	0.351465	5.5298	3.84619	-0.523798
Arabidopsis	root vs. shoot	AT5G24250	2.83609	0.0268715	0.351673	0.335347	6.24536	4.21906
Arabidopsis	root vs. shoot	AT5G58150	0.261299	0.026918	0.35196	3.66553	13.843	1.91707
Arabidopsis	root vs. shoot	AT2G41170	0.123896	0.0269267	0.35196	10.0502	3.8676	-1.37772
Arabidopsis	root vs. shoot	AT2G34420	0.0208304	0.0269647	0.352022	4.80234	3.31731	-0.533725
Arabidopsis	root vs. shoot	AT1G76680	0.0235281	0.02695	0.352022	5.49714	3.61932	-0.602962
Arabidopsis	root vs. shoot	AT5G15130	0.296482	0.0270057	0.352339	2.95376	21.503	2.86391
Arabidopsis	root vs. shoot	AT2G35820	0.239869	0.027095	0.353286	9.91047	2.47955	-1.99887
Arabidopsis	root vs. shoot	AT5G42990	0.0525837	0.0271874	0.353861	5.26775	2.87845	-0.871894
Arabidopsis	root vs. shoot	AT5G10890	0.602194	0.0271894	0.353861	5.05905	2.97563	-0.765672
Arabidopsis	root vs. shoot	AT5G22660	0.851725	0.0271771	0.353861	0.979302	4.61219	2.23563
Arabidopsis	root vs. shoot	AT5G20200	0.0275806	0.0272059	0.353861	2.19125	3.39055	0.629763
Arabidopsis	root vs. shoot	AT4G21720	0.12596	0.0274214	0.356445	3.35793	8.92231	1.40984
Arabidopsis	root vs. shoot	AT3G02645	1.29828	0.0275589	0.356885	18.9456	0.685688	-4.78817
Arabidopsis	root vs. shoot	AT5G65080	0.412369	0.0275216	0.356885	12.2185	2.03188	-2.58817
Arabidopsis	root vs. shoot	AT5G08490	0.0760741	0.0275733	0.356885	1321.91	570.065	-1.21342
Arabidopsis	root vs. shoot	AT4G04200	0.0425326	0.0275667	0.356885	5.52947	3.18269	-0.796894
Arabidopsis	root vs. shoot	AT5G08150	0.644074	0.0275481	0.356885	15.2906	10.7703	-0.505595
Arabidopsis	root vs. shoot	AT1G63440	0.112173	0.0275374	0.356885	9.26484	22.2008	1.26077
Arabidopsis	root vs. shoot	AT1G69160	0.0548562	0.0275592	0.356885	8.55423	4.41638	-0.953773
Arabidopsis	root vs. shoot	AT3G05210	0.0520531	0.0275905	0.356889	3.05652	1.64089	-0.897412
Arabidopsis	root vs. shoot	AT5G57760	0.222121	0.0276334	0.357226	0.63049	3.34265	2.40644
Arabidopsis	root vs. shoot	AT3G49950	0.817013	0.0276859	0.357685	128.174	5.5753	-4.52292
Arabidopsis	root vs. shoot	AT5G64110	0.058898	0.0277114	0.357796	7.20045	3.75963	-0.937495
Arabidopsis	root vs. shoot	AT3G28550	0.0374427	0.0277403	0.357952	1.7907	2.95471	0.722495
Arabidopsis	root vs. shoot	AT5G22794	2.4645	0.027822	0.358568	0.394758	0.0408296	-3.27328
Arabidopsis	root vs. shoot	AT1G02575	0.233569	0.0278202	0.358568	8.67169	0.604171	-3.84328
Arabidopsis	root vs. shoot	AT3G54660	0.0154214	0.0279019	0.35938	3.60398	4.97374	0.464739
Arabidopsis	root vs. shoot	AT4G14890	0.0761431	0.0279249	0.359457	2.97603	6.23067	1.066
Arabidopsis	root vs. shoot	AT1G28190	0.544188	0.0280246	0.359864	0.668635	5.12154	2.93729
Arabidopsis	root vs. shoot	AT2G18120	0.895802	0.0280069	0.359864	0.454399	1.9392	2.09343
Arabidopsis	root vs. shoot	AT5G35660	0.437156	0.0279896	0.359864	28.8629	25.5246	-0.177328
Arabidopsis	root vs. shoot	AT5G55910	0.0312208	0.028012	0.359864	2.89926	4.5874	0.661992
Arabidopsis	root vs. shoot	AT2G17300	0.070193	0.0280932	0.359872	2.24885	4.61379	1.03677
Arabidopsis	root vs. shoot	AT5G13150	0.0263266	0.028079	0.359872	4.60343	2.57051	-0.840653
Arabidopsis	root vs. shoot	AT3G11110	0.572105	0.0280704	0.359872	23.627	1.49227	-3.98485
Arabidopsis	root vs. shoot	AT5G17670	0.102931	0.0280455	0.359872	3.70241	1.54195	-1.26371
Arabidopsis	root vs. shoot	AT1G43245	0.118716	0.0281292	0.360115	1.43137	3.65732	1.35339
Arabidopsis	root vs. shoot	AT3G55440	0.0114686	0.0281879	0.360648	6.58044	5.00821	-0.393891
Arabidopsis	root vs. shoot	AT4G18480	0.0240508	0.0282947	0.361796	8.94574	5.97671	-0.58185
Arabidopsis	root vs. shoot	AT1G67640	1.38671	0.0284281	0.363282	36.5626	13.44	-1.44384
Arabidopsis	root vs. shoot	AT4G23680	0.0311434	0.0284476	0.363312	14.4238	9.1552	-0.655789
Arabidopsis	root vs. shoot	AT4G00820	0.155335	0.0285351	0.36338	1.73496	4.77153	1.45955
Arabidopsis	root vs. shoot	AT1G22380	0.819261	0.028556	0.36338	90.451	4.2039	-4.42733
Arabidopsis	root vs. shoot	AT1G72860	0.308041	0.0285523	0.36338	1.8987	0.448582	-2.08157
Arabidopsis	root vs. shoot	AT1G48610	0.0689183	0.0285501	0.36338	5.50728	2.77046	-0.991216
Arabidopsis	root vs. shoot	AT1G69730	0.206273	0.0284739	0.36338	17.7722	3.24278	-2.45432
Arabidopsis	root vs. shoot	AT3G16370	0.0408154	0.0285088	0.36338	9.06566	5.41058	-0.744628
Arabidopsis	root vs. shoot	AT2G32250	0.177313	0.0286404	0.364236	1.02368	3.04549	1.57291
Arabidopsis	root vs. shoot	AT2G45740	0.0208818	0.0286827	0.364554	8.8836	5.90051	-0.590306
Arabidopsis	root vs. shoot	AT5G65520	0.0703411	0.0288297	0.364889	3.6516	1.79168	-1.02722
Arabidopsis	root vs. shoot	AT1G68520	0.107204	0.0287999	0.364889	10.9014	4.02776	-1.43646
Arabidopsis	root vs. shoot	AT4G24265	0.341735	0.0287667	0.364889	3.26931	0.694967	-2.23397
Arabidopsis	root vs. shoot	AT4G32410	0.00941598	0.0287791	0.364889	2.46139	3.14915	0.355488
Arabidopsis	root vs. shoot	AT2G28900	0.0412119	0.0287555	0.364889	6.17794	3.6568	-0.756543
Arabidopsis	root vs. shoot	AT3G14580	0.190959	0.0288138	0.364889	2.32034	7.54828	1.70181
Arabidopsis	root vs. shoot	AT5G03370	0.0696065	0.0287718	0.364889	2.5517	5.13915	1.01007
Arabidopsis	root vs. shoot	AT5G26660	0.136606	0.0288584	0.365034	4.32298	1.40979	-1.61654
Arabidopsis	root vs. shoot	AT1G24620	0.722331	0.0289039	0.365391	9.92238	121.399	3.61293
Arabidopsis	root vs. shoot	AT5G62440	0.0265701	0.0289477	0.365537	7.7186	11.9044	0.625085
Arabidopsis	root vs. shoot	AT5G14530	0.0908631	0.02895	0.365537	2.69038	6.07347	1.17471
Arabidopsis	root vs. shoot	AT1G31040	0.387989	0.0289995	0.365943	0.969746	6.06236	2.6442
Arabidopsis	root vs. shoot	AT1G08260	0.249519	0.0293306	0.369901	2.38114	8.48019	1.83244
Arabidopsis	root vs. shoot	AT4G01310	0.0313689	0.0293544	0.369981	6.8633	4.33096	-0.664217
Arabidopsis	root vs. shoot	AT3G28900	0.012072	0.0294162	0.370539	4.60809	3.46485	-0.411376
Arabidopsis	root vs. shoot	AT2G32450	0.0195775	0.0294575	0.370649	4.67668	6.79372	0.538718
Arabidopsis	root vs. shoot	AT4G35590	0.674113	0.02946	0.370649	0.891466	8.9392	3.32589
Arabidopsis	root vs. shoot	AT3G02690	0.0561905	0.0295972	0.370757	2.74845	1.45761	-0.915009
Arabidopsis	root vs. shoot	AT1G72240	0.0820132	0.0296091	0.370757	5.50897	2.40998	-1.19276
Arabidopsis	root vs. shoot	AT1G67420	0.0543722	0.0295992	0.370757	3.04159	1.62278	-0.906363
Arabidopsis	root vs. shoot	AT5G51800	0.465843	0.0296691	0.370757	5.10119	0.752887	-2.76033
Arabidopsis	root vs. shoot	AT3G21380	0.214237	0.0295492	0.370757	23.0269	5.56328	-2.04931
Arabidopsis	root vs. shoot	AT3G16785	0.178871	0.0294921	0.370757	2.28954	6.7111	1.55149
Arabidopsis	root vs. shoot	AT5G56880	1.68255	0.0295687	0.370757	3.97392	0.408437	-3.28238
Arabidopsis	root vs. shoot	AT1G29300	0.0530547	0.0296963	0.370757	2.83029	5.21234	0.880981
Arabidopsis	root vs. shoot	AT2G36390	0.0482449	0.0296339	0.370757	2.76766	4.84898	0.809017
Arabidopsis	root vs. shoot	AT1G28290	0.0198714	0.0296208	0.370757	4.1416	5.93519	0.519105
Arabidopsis	root vs. shoot	AT1G55760	0.221519	0.0295609	0.370757	1.23998	0.366992	-1.7565
Arabidopsis	root vs. shoot	AT5G63160	0.0341762	0.0296754	0.370757	4.43992	2.55441	-0.797544
Arabidopsis	root vs. shoot	AT5G47770	0.0112545	0.0296791	0.370757	4.75613	3.62036	-0.393656
Arabidopsis	root vs. shoot	AT4G10620	0.07077	0.0297633	0.371375	2.12461	4.24596	0.998895
Arabidopsis	root vs. shoot	AT2G15580	0.0445872	0.0297862	0.371441	2.18679	1.2538	-0.80251
Arabidopsis	root vs. shoot	AT5G43730	0.10972	0.0298406	0.3719	3.70957	1.54868	-1.26021
Arabidopsis	root vs. shoot	AT1G17880	0.00970706	0.0299462	0.372777	5.94444	4.62389	-0.362436
Arabidopsis	root vs. shoot	AT1G22650	0.0504744	0.0299339	0.372777	4.0767	2.2292	-0.870879
Arabidopsis	root vs. shoot	AT1G18390	0.0380937	0.0300175	0.373446	2.9076	4.99906	0.78183
Arabidopsis	root vs. shoot	AT1G08780	0.0355531	0.0300793	0.373555	5.56036	3.36293	-0.725459
Arabidopsis	root vs. shoot	AT1G03210	0.026963	0.0300617	0.373555	3.35359	2.14423	-0.64525
Arabidopsis	root vs. shoot	AT5G15100	2.63406	0.0300687	0.373555	12.7269	0.0821632	-7.27517
Arabidopsis	root vs. shoot	AT5G20030	0.244269	0.030151	0.374226	4.89797	1.31236	-1.90002
Arabidopsis	root vs. shoot	AT4G37560	0.282306	0.0301859	0.374439	0.592865	2.50935	2.08154
Arabidopsis	root vs. shoot	AT5G16370	0.0318549	0.0302341	0.374818	3.34784	5.34012	0.673642
Arabidopsis	root vs. shoot	AT2G21660	0.0242437	0.0302858	0.37502	6.62895	9.87376	0.574819
Arabidopsis	root vs. shoot	AT3G50330	0.756739	0.0302723	0.37502	9.29161	5.8634	-0.664191
Arabidopsis	root vs. shoot	AT4G02210	0.0567117	0.030368	0.375817	5.57553	2.9585	-0.914241
Arabidopsis	root vs. shoot	AT3G55330	0.335044	0.0303964	0.375948	20.9622	4.41448	-2.24747
Arabidopsis	root vs. shoot	AT3G16230	0.0216464	0.0304445	0.376324	3.63562	2.47663	-0.553819
Arabidopsis	root vs. shoot	AT5G48680	0.0369855	0.0304794	0.376536	3.9409	6.60937	0.745988
Arabidopsis	root vs. shoot	AT3G25700	0.0192017	0.0305543	0.37724	3.91144	5.6385	0.527612
Arabidopsis	root vs. shoot	AT1G11070	0.121073	0.0307045	0.378432	0.730591	2.69131	1.88117
Arabidopsis	root vs. shoot	AT2G32295	0.100715	0.0306948	0.378432	2.87664	1.25151	-1.20071
Arabidopsis	root vs. shoot	AT5G63060	0.0472465	0.0306911	0.378432	3.98923	7.51707	0.914059
Arabidopsis	root vs. shoot	AT1G60130	1.54478	0.0308741	0.380301	0.484874	25.1697	5.69794
Arabidopsis	root vs. shoot	AT4G18440	0.0253689	0.0309357	0.380396	5.26226	7.94454	0.594281
Arabidopsis	root vs. shoot	AT1G01770	0.0595433	0.0309266	0.380396	3.86119	2.03602	-0.923294
Arabidopsis	root vs. shoot	AT4G27290	0.0867388	0.0309037	0.380396	2.70526	1.09425	-1.30583
Arabidopsis	root vs. shoot	AT3G25730	0.0595356	0.0310445	0.381512	5.15861	2.66319	-0.953828
Arabidopsis	root vs. shoot	AT5G28080	0.25669	0.0311338	0.381676	5.50772	28.3543	2.36404
Arabidopsis	root vs. shoot	AT3G21870	0.576483	0.0310846	0.381676	20.4258	1.32314	-3.94835
Arabidopsis	root vs. shoot	AT1G36940	0.0932848	0.0310952	0.381676	4.05616	9.39905	1.2124
Arabidopsis	root vs. shoot	AT3G17609	0.0271987	0.0311481	0.381676	4.55564	2.974	-0.615248
Arabidopsis	root vs. shoot	AT1G52990	0.873474	0.0311323	0.381676	0.07432	0.993435	3.7406
Arabidopsis	root vs. shoot	AT1G56550	0.0452881	0.0312094	0.381765	4.43185	2.44303	-0.859235
Arabidopsis	root vs. shoot	AT5G54600	0.0172984	0.0312062	0.381765	9.13367	6.50223	-0.490259
Arabidopsis	root vs. shoot	AT5G47450	0.0308882	0.0312053	0.381765	4.65755	8.1507	0.807352
Arabidopsis	root vs. shoot	AT4G25835	0.0435242	0.0312957	0.382378	4.20962	7.47232	0.827867
Arabidopsis	root vs. shoot	AT4G10150	1.45426	0.0312905	0.382378	0.578645	5.09452	3.1382
Arabidopsis	root vs. shoot	AT1G17530	0.0269011	0.0313147	0.38239	7.34212	11.6693	0.668454
Arabidopsis	root vs. shoot	AT4G18120	0.0391371	0.03134	0.382478	1.63729	0.973475	-0.75009
Arabidopsis	root vs. shoot	AT3G10620	0.0521526	0.0313705	0.382619	2.62376	4.76683	0.861393
Arabidopsis	root vs. shoot	AT3G42880	1.50594	0.0313877	0.382619	22.7141	0.485077	-5.54923
Arabidopsis	root vs. shoot	AT5G58784	0.0671344	0.0314719	0.383425	4.23443	1.22449	-1.78998
Arabidopsis	root vs. shoot	AT3G01513	0.189438	0.0315734	0.383599	3.41142	16.0639	2.23538
Arabidopsis	root vs. shoot	AT3G53690	0.154792	0.0315768	0.383599	28.95	142.294	2.29724
Arabidopsis	root vs. shoot	AT2G07775	0.316807	0.031573	0.383599	2.71695	0.646322	-2.07166
Arabidopsis	root vs. shoot	AT3G13224	0.0729303	0.0315679	0.383599	4.90268	2.41431	-1.02196
Arabidopsis	root vs. shoot	AT3G12270	0.0221669	0.0315565	0.383599	3.7933	5.62068	0.567292
Arabidopsis	root vs. shoot	AT2G03310	1.21218	0.031676	0.384552	84.7962	2.67246	-4.98776
Arabidopsis	root vs. shoot	AT5G61420	0.0747951	0.0316916	0.384552	1.64425	0.822859	-0.998716
Arabidopsis	root vs. shoot	AT1G29240	0.140092	0.0317223	0.384703	2.75008	7.23277	1.39507
Arabidopsis	root vs. shoot	AT3G03360	1.57963	0.0317717	0.384929	0.28479	0.00883275	-5.01089
Arabidopsis	root vs. shoot	AT1G63260	0.0362838	0.0317773	0.384929	3.22	5.53289	0.780971
Arabidopsis	root vs. shoot	AT3G48110	0.0132254	0.0318294	0.385339	2.88031	3.87967	0.429711
Arabidopsis	root vs. shoot	AT4G31280	3.22696	0.0319432	0.386496	0.0253443	0.303652	3.58269
Arabidopsis	root vs. shoot	AT4G02715	0.0547256	0.0319683	0.386579	3.81777	2.08218	-0.87464
Arabidopsis	root vs. shoot	AT2G22910	0.0262661	0.0320035	0.38676	3.82549	5.87478	0.618892
Arabidopsis	root vs. shoot	AT5G42825	0.630456	0.0320313	0.38676	1.41821	0.153627	-3.20657
Arabidopsis	root vs. shoot	AT3G48560	0.0127468	0.0320381	0.38676	6.9799	9.25819	0.407525
Arabidopsis	root vs. shoot	AT5G63120	0.0650765	0.0321371	0.387586	2.53199	4.82912	0.931487
Arabidopsis	root vs. shoot	AT3G62750	0.23621	0.0321431	0.387586	7.35619	2.09021	-1.81531
Arabidopsis	root vs. shoot	AT4G16240	0.261785	0.0321709	0.3877	15.8017	74.1825	2.231
Arabidopsis	root vs. shoot	AT2G46500	0.0123212	0.032205	0.387889	5.11553	3.84538	-0.411758
Arabidopsis	root vs. shoot	AT2G35930	0.0472416	0.0324064	0.388472	4.03701	7.59927	0.912574
Arabidopsis	root vs. shoot	AT4G22810	0.23303	0.0323679	0.388472	2.5598	10.7695	2.07284
Arabidopsis	root vs. shoot	AT1G44446	0.0167815	0.0323589	0.388472	5.49971	3.92847	-0.485387
Arabidopsis	root vs. shoot	AT5G11180	0.914657	0.0324392	0.388472	3.07753	38.8663	3.65867
Arabidopsis	root vs. shoot	AT1G68850	0.457436	0.0322818	0.388472	7.50653	46.1507	2.62013
Arabidopsis	root vs. shoot	AT1G66620	0.0407414	0.0323273	0.388472	3.40599	5.82538	0.774275
Arabidopsis	root vs. shoot	AT1G26560	0.0358406	0.0324552	0.388472	7.21444	4.05013	-0.83292
Arabidopsis	root vs. shoot	AT1G33810	0.0285446	0.0324309	0.388472	3.7957	2.44451	-0.634819
Arabidopsis	root vs. shoot	AT3G01090	0.0139026	0.0324062	0.388472	4.34289	3.2081	-0.436935
Arabidopsis	root vs. shoot	AT3G25690	0.102214	0.0323779	0.388472	2.46213	1.10339	-1.15797
Arabidopsis	root vs. shoot	AT4G12070	0.0589642	0.0323263	0.388472	1.97471	1.06351	-0.892802
Arabidopsis	root vs. shoot	AT5G51110	0.0460757	0.0324738	0.388475	6.43567	3.68722	-0.803556
Arabidopsis	root vs. shoot	AT5G48180	0.0201926	0.032498	0.388544	6.47941	9.38833	0.535006
Arabidopsis	root vs. shoot	AT4G28280	1.7456	0.0326258	0.38983	0.553535	5.75009	3.37684
Arabidopsis	root vs. shoot	AT1G73120	0.0685183	0.0326633	0.38983	9.6722	4.7444	-1.02762
Arabidopsis	root vs. shoot	AT2G07732	1.38398	0.0326792	0.38983	2.49689	0.569491	-2.13239
Arabidopsis	root vs. shoot	AT1G50510	0.0335822	0.0326542	0.38983	3.7711	6.11646	0.697711
Arabidopsis	root vs. shoot	AT1G69620	0.0155412	0.0327509	0.390465	3.89589	2.86043	-0.445719
Arabidopsis	root vs. shoot	AT3G18773	0.141628	0.0327985	0.390812	4.14375	1.52242	-1.44457
Arabidopsis	root vs. shoot	AT1G76570	0.1117	0.0329247	0.391527	1.14259	2.92262	1.35495
Arabidopsis	root vs. shoot	AT1G12680	0.146452	0.0328975	0.391527	2.029	0.762289	-1.41236
Arabidopsis	root vs. shoot	AT1G68190	0.229125	0.0328892	0.391527	8.47052	1.74567	-2.27867
Arabidopsis	root vs. shoot	AT5G45095	1.19701	0.0329325	0.391527	2.93357	0.148722	-4.30197
Arabidopsis	root vs. shoot	AT1G26762	1.66984	0.0330948	0.392709	0.36198	2.12084	2.55065
Arabidopsis	root vs. shoot	AT2G28420	2.41993	0.0331062	0.392709	8.13649	0.0731864	-6.79669
Arabidopsis	root vs. shoot	AT5G62810	0.0139001	0.033054	0.392709	3.19852	4.32187	0.434251
Arabidopsis	root vs. shoot	AT1G11870	0.0367789	0.0330801	0.392709	2.72851	4.44633	0.704504
Arabidopsis	root vs. shoot	AT5G10720	0.0995415	0.0331425	0.39292	2.71596	1.10964	-1.29137
Arabidopsis	root vs. shoot	AT2G30900	1.78554	0.033241	0.393206	18.3566	5.18699	-1.82333
Arabidopsis	root vs. shoot	AT4G14360	0.0135644	0.033197	0.393206	4.88432	3.63219	-0.427319
Arabidopsis	root vs. shoot	AT5G25265	0.0247025	0.0332387	0.393206	2.98647	4.4424	0.572898
Arabidopsis	root vs. shoot	AT1G63420	0.0570041	0.0332107	0.393206	2.32927	1.2451	-0.903612
Arabidopsis	root vs. shoot	AT3G11100	0.0563023	0.03329	0.393565	3.94452	7.4761	0.922437
Arabidopsis	root vs. shoot	AT3G22240	0.0296032	0.0333214	0.393717	5.0225	8.36985	0.736797
Arabidopsis	root vs. shoot	AT3G53150	0.554418	0.0333423	0.393744	5.03656	40.0616	2.99171
Arabidopsis	root vs. shoot	AT4G34710	0.0255862	0.0333693	0.393843	1.39081	0.937136	-0.569592
Arabidopsis	root vs. shoot	AT2G01275	0.245178	0.0334152	0.394165	3.53405	0.821463	-2.10506
Arabidopsis	root vs. shoot	AT3G13680	2.19756	0.0334365	0.394197	0.342413	2.86116	3.06279
Arabidopsis	root vs. shoot	AT2G24645	0.479914	0.0334728	0.394281	20.5552	2.76683	-2.8932
Arabidopsis	root vs. shoot	AT4G37740	0.107892	0.0334809	0.394281	1.35978	3.16532	1.21898
Arabidopsis	root vs. shoot	AT5G60550	0.0257178	0.0335186	0.394505	1.7055	2.59601	0.6061
Arabidopsis	root vs. shoot	AT1G06149	2.20185	0.033592	0.394976	0.217172	1.50417	2.79206
Arabidopsis	root vs. shoot	AT5G38640	0.0428868	0.033596	0.394976	2.2758	3.83315	0.752153
Arabidopsis	root vs. shoot	AT4G37060	1.38785	0.0336562	0.395465	1.8892	9.72828	2.36441
Arabidopsis	root vs. shoot	AT3G61300	0.0814199	0.0337185	0.395977	2.19763	5.38289	1.29243
Arabidopsis	root vs. shoot	AT1G74540	1.24659	0.0337941	0.396425	0.230679	5.3835	4.54459
Arabidopsis	root vs. shoot	AT3G11450	0.0185799	0.0337804	0.396425	3.32449	4.68411	0.494641
Arabidopsis	root vs. shoot	AT3G05150	0.252268	0.0339598	0.397049	4.096	14.4847	1.82224
Arabidopsis	root vs. shoot	AT3G56740	0.0533603	0.0339422	0.397049	3.14932	1.72626	-0.867391
Arabidopsis	root vs. shoot	AT5G19960	0.109257	0.0338753	0.397049	3.85654	9.13865	1.24468
Arabidopsis	root vs. shoot	AT1G77890	0.230091	0.0339518	0.397049	2.14166	0.610718	-1.81015
Arabidopsis	root vs. shoot	AT4G18510	0.297634	0.0339294	0.397049	2.574	0.266821	-3.27007
Arabidopsis	root vs. shoot	AT1G28150	0.0314961	0.0339581	0.397049	2.65933	4.32366	0.701189
Arabidopsis	root vs. shoot	AT2G40260	0.535867	0.0339873	0.39715	1.02771	6.50015	2.66104
Arabidopsis	root vs. shoot	AT5G25140	0.0479756	0.0340497	0.397421	3.91439	2.18191	-0.843196
Arabidopsis	root vs. shoot	AT3G21150	0.172504	0.0340668	0.397421	0.574548	2.56746	2.15984
Arabidopsis	root vs. shoot	AT1G68150	0.325475	0.0340488	0.397421	2.10116	10.529	2.32511
Arabidopsis	root vs. shoot	AT5G10060	0.0268643	0.0341134	0.397746	2.76945	1.80159	-0.62033
Arabidopsis	root vs. shoot	AT2G27260	0.0518242	0.0341391	0.397825	7.15922	13.2518	0.888318
Arabidopsis	root vs. shoot	AT3G58460	0.0224317	0.0341867	0.398117	3.27417	2.23547	-0.550551
Arabidopsis	root vs. shoot	AT4G07666	1.75487	0.0342017	0.398117	5.15795	1.29838	-1.99009
Arabidopsis	root vs. shoot	AT3G18490	0.0130917	0.0344265	0.399067	5.19041	6.901	0.410956
Arabidopsis	root vs. shoot	AT2G31150	1.77739	0.0345225	0.399067	0.620626	0.0167828	-5.20867
Arabidopsis	root vs. shoot	AT1G23720	0.0477471	0.0343724	0.399067	2.06661	3.69237	0.837279
Arabidopsis	root vs. shoot	AT1G64860	0.021711	0.0345031	0.399067	2.79525	4.10681	0.555041
Arabidopsis	root vs. shoot	AT1G63910	2.15539	0.0343477	0.399067	0.570329	5.80051	3.34631
Arabidopsis	root vs. shoot	AT3G53560	0.0457738	0.0344158	0.399067	4.78692	8.24672	0.784722
Arabidopsis	root vs. shoot	AT5G51750	0.122022	0.0344887	0.399067	12.5882	5.19742	-1.2762
Arabidopsis	root vs. shoot	AT1G14250	0.782044	0.0343284	0.399067	122.743	6.5994	-4.21716
Arabidopsis	root vs. shoot	AT5G20550	0.151823	0.0344231	0.399067	2.99259	8.76491	1.55035
Arabidopsis	root vs. shoot	AT3G48180	0.323619	0.0343548	0.399067	7.55383	13.1431	0.79902
Arabidopsis	root vs. shoot	AT2G07795	3.46861	0.0345285	0.399067	4.71433	0.232314	-4.34291
Arabidopsis	root vs. shoot	AT1G73990	0.0177588	0.0345007	0.399067	3.19754	4.50141	0.493413
Arabidopsis	root vs. shoot	AT3G25013	2.16301	0.0345217	0.399067	0.0541581	4.01995	6.21386
Arabidopsis	root vs. shoot	AT5G47160	0.402036	0.0346513	0.400268	19.4696	3.21728	-2.59731
Arabidopsis	root vs. shoot	AT2G41760	0.0793652	0.0346822	0.400406	3.86282	1.85015	-1.06201
Arabidopsis	root vs. shoot	AT1G71140	0.888966	0.0347356	0.400804	35.8103	2.41238	-3.89185
Arabidopsis	root vs. shoot	AT3G20475	0.227926	0.0347756	0.401009	8.57546	2.459	-1.80214
Arabidopsis	root vs. shoot	AT2G28500	1.71892	0.0348481	0.401009	0.350817	2.03971	2.53957
Arabidopsis	root vs. shoot	AT4G16810	1.26234	0.034846	0.401009	0.869588	20.8295	4.58215
Arabidopsis	root vs. shoot	AT3G08680	0.0473161	0.0348058	0.401009	1.95477	3.36801	0.784893
Arabidopsis	root vs. shoot	AT5G55930	0.179588	0.0348398	0.401009	8.70305	2.75057	-1.66179
Arabidopsis	root vs. shoot	AT1G27660	0.229959	0.034891	0.401285	1.67593	5.71296	1.76927
Arabidopsis	root vs. shoot	AT1G19640	0.428323	0.0349154	0.401347	0.548096	3.82443	2.80274
Arabidopsis	root vs. shoot	AT3G11210	0.0231137	0.0349389	0.401399	5.11441	3.39547	-0.590958
Arabidopsis	root vs. shoot	AT5G15850	0.14788	0.0350296	0.401786	6.12276	2.30157	-1.41156
Arabidopsis	root vs. shoot	AT5G23240	0.74701	0.0350141	0.401786	0.402482	4.08647	3.34386
Arabidopsis	root vs. shoot	AT1G62981	0.643294	0.0349981	0.401786	1.16095	9.80915	3.07883
Arabidopsis	root vs. shoot	AT2G35030	0.30808	0.0350945	0.402313	2.57433	10.477	2.02497
Arabidopsis	root vs. shoot	AT5G17700	0.165827	0.0351169	0.402352	10.2962	3.55503	-1.53418
Arabidopsis	root vs. shoot	AT5G65230	2.21825	0.0351961	0.403022	1.87942	15.7378	3.06587
Arabidopsis	root vs. shoot	AT3G25855	0.917821	0.0352135	0.403022	1.56683	0.105279	-3.89556
Arabidopsis	root vs. shoot	AT4G30490	0.0166196	0.0352336	0.403035	4.2424	3.05368	-0.47433
Arabidopsis	root vs. shoot	AT2G45220	0.0194614	0.0354546	0.403599	7.27859	10.864	0.577829
Arabidopsis	root vs. shoot	AT1G17520	0.0466041	0.0354199	0.403599	4.93928	2.78602	-0.826095
Arabidopsis	root vs. shoot	AT4G23020	0.206751	0.0353789	0.403599	0.65675	2.13569	1.70129
Arabidopsis	root vs. shoot	AT4G00810	0.0147737	0.0354395	0.403599	2.81576	2.08412	-0.434088
Arabidopsis	root vs. shoot	AT5G17280	0.0432412	0.035353	0.403599	3.65648	2.17393	-0.750148
Arabidopsis	root vs. shoot	AT1G76040	0.0346097	0.035379	0.403599	6.08713	3.61741	-0.750806
Arabidopsis	root vs. shoot	AT4G35640	0.118726	0.0353095	0.403599	5.50836	2.23592	-1.30076
Arabidopsis	root vs. shoot	AT5G39570	0.014807	0.0354129	0.403599	5.5497	7.49263	0.433062
Arabidopsis	root vs. shoot	AT5G42760	0.22046	0.0353818	0.403599	9.48706	2.79151	-1.76492
Arabidopsis	root vs. shoot	AT1G68940	0.205461	0.0355323	0.404261	2.37945	0.780369	-1.6084
Arabidopsis	root vs. shoot	AT3G04310	0.371215	0.035551	0.404261	0.981031	4.82221	2.29732
Arabidopsis	root vs. shoot	AT1G62260	0.20852	0.0356221	0.404852	1.71967	5.61626	1.70748
Arabidopsis	root vs. shoot	AT5G41765	1.45938	0.0356477	0.404925	0.75968	0.0163282	-5.53996
Arabidopsis	root vs. shoot	AT2G31810	0.01676	0.0357078	0.405391	3.68871	5.10046	0.467511
Arabidopsis	root vs. shoot	AT2G28260	0.175431	0.0357497	0.405649	0.936683	2.68927	1.52158
Arabidopsis	root vs. shoot	AT5G03560	0.267087	0.0358143	0.405949	1.88687	6.76861	1.84287
Arabidopsis	root vs. shoot	AT5G16970	0.18535	0.0358772	0.405949	15.3402	4.91443	-1.64222
Arabidopsis	root vs. shoot	AT2G18340	1.31618	0.0358609	0.405949	0.666621	14.5947	4.45243
Arabidopsis	root vs. shoot	AT2G04170	0.0337752	0.0358785	0.405949	1.96826	3.47165	0.8187
Arabidopsis	root vs. shoot	AT2G32480	0.030067	0.0358912	0.405949	3.10812	4.84724	0.641119
Arabidopsis	root vs. shoot	AT4G18610	0.142782	0.035851	0.405949	3.92254	11.4544	1.54605
Arabidopsis	root vs. shoot	AT5G60970	0.769333	0.0359938	0.406674	30.9745	2.16754	-3.83695
Arabidopsis	root vs. shoot	AT2G42990	0.227583	0.0359926	0.406674	12.6429	3.36552	-1.90943
Arabidopsis	root vs. shoot	AT5G48490	0.461996	0.0360359	0.406929	46.287	4.85173	-3.25404
Arabidopsis	root vs. shoot	AT3G23000	0.0207507	0.0360548	0.406929	2.58311	3.68562	0.512797
Arabidopsis	root vs. shoot	AT5G16260	0.031543	0.0360949	0.407165	4.73842	3.01583	-0.65185
Arabidopsis	root vs. shoot	AT5G55350	1.9927	0.0361436	0.407496	0.475963	33.518	6.13794
Arabidopsis	root vs. shoot	AT5G62820	0.464384	0.0362565	0.408551	5.50899	31.3583	2.50899
Arabidopsis	root vs. shoot	AT2G15050	0.0870349	0.0363414	0.40869	5.56804	2.53929	-1.13274
Arabidopsis	root vs. shoot	AT3G57080	0.125347	0.036346	0.40869	8.61593	3.59608	-1.26058
Arabidopsis	root vs. shoot	AT5G05365	0.350757	0.0363312	0.40869	0.810499	4.60292	2.50567
Arabidopsis	root vs. shoot	AT3G01050	0.133568	0.0363158	0.40869	1.70568	0.683816	-1.31867
Arabidopsis	root vs. shoot	AT3G26855	2.17104	0.0365135	0.410349	5.70347	1.09849	-2.37631
Arabidopsis	root vs. shoot	AT2G35110	0.138275	0.0365323	0.410349	2.86499	7.08251	1.30573
Arabidopsis	root vs. shoot	AT5G01230	0.0540838	0.0365589	0.410429	4.40961	2.44648	-0.849945
Arabidopsis	root vs. shoot	AT5G05630	0.107774	0.0365884	0.410542	3.33414	1.41202	-1.23955
Arabidopsis	root vs. shoot	AT3G13432	1.02763	0.036688	0.411284	0.977794	17.4376	4.15653
Arabidopsis	root vs. shoot	AT1G35320	0.433154	0.0367322	0.411284	0.837434	0.166849	-2.32743
Arabidopsis	root vs. shoot	AT5G64280	0.110687	0.0367299	0.411284	1.44983	3.32829	1.1989
Arabidopsis	root vs. shoot	AT3G29130	0.113741	0.0366997	0.411284	4.43152	1.88766	-1.2312
Arabidopsis	root vs. shoot	AT2G07727	0.0409133	0.0367572	0.411347	3.20415	1.95163	-0.715264
Arabidopsis	root vs. shoot	AT1G25220	0.026848	0.0368414	0.412071	4.73215	7.1868	0.602854
Arabidopsis	root vs. shoot	AT5G17260	0.255924	0.0368701	0.412174	4.12627	18.801	2.1879
Arabidopsis	root vs. shoot	AT1G52380	0.0154365	0.0369181	0.412492	4.7698	3.47586	-0.456557
Arabidopsis	root vs. shoot	AT4G16890	0.0948142	0.037001	0.4132	1.88267	0.881106	-1.09539
Arabidopsis	root vs. shoot	AT5G27670	0.0189611	0.0370321	0.413329	4.4709	3.15826	-0.501436
Arabidopsis	root vs. shoot	AT5G57310	1.84637	0.0370953	0.413381	0.00678004	0.342629	5.65921
Arabidopsis	root vs. shoot	AT2G29440	0.0874134	0.0370939	0.413381	6.241	2.85808	-1.12673
Arabidopsis	root vs. shoot	AT2G41510	0.0966354	0.0370932	0.413381	3.67592	8.3137	1.17739
Arabidopsis	root vs. shoot	AT2G33855	0.39533	0.0371241	0.413484	6.96197	1.3979	-2.31624
Arabidopsis	root vs. shoot	AT5G07150	0.333563	0.0371658	0.413544	1.87672	0.437907	-2.09952
Arabidopsis	root vs. shoot	AT5G63100	0.187077	0.0371881	0.413544	1.99056	6.15182	1.62784
Arabidopsis	root vs. shoot	AT5G15780	0.085523	0.0371851	0.413544	17.5032	8.21168	-1.09187
Arabidopsis	root vs. shoot	AT1G49010	0.383904	0.0372387	0.413889	6.91588	1.39711	-2.30747
Arabidopsis	root vs. shoot	AT3G21340	0.186927	0.0372824	0.414157	3.03453	10.4514	1.78415
Arabidopsis	root vs. shoot	AT1G74470	0.0184527	0.0373178	0.414334	9.00475	6.46917	-0.477107
Arabidopsis	root vs. shoot	AT3G15790	0.0559008	0.0373859	0.414493	4.43661	8.21319	0.888487
Arabidopsis	root vs. shoot	AT1G14970	0.307568	0.0374301	0.414493	1.25855	0.318126	-1.98409
Arabidopsis	root vs. shoot	AT1G12800	0.0176879	0.0374148	0.414493	3.36241	2.40623	-0.482723
Arabidopsis	root vs. shoot	AT1G22630	0.268971	0.0373624	0.414493	8.49941	2.33129	-1.86623
Arabidopsis	root vs. shoot	AT2G44930	1.09601	0.0374144	0.414493	0.211941	5.40548	4.67268
Arabidopsis	root vs. shoot	AT5G62680	0.0310243	0.0375199	0.414733	4.67366	7.16944	0.617306
Arabidopsis	root vs. shoot	AT5G49600	4.07889	0.0375302	0.414733	0.249504	6.13796	4.62063
Arabidopsis	root vs. shoot	AT4G22490	0.167185	0.037476	0.414733	0.708971	6.78701	3.25898
Arabidopsis	root vs. shoot	AT3G10160	0.0189996	0.0375217	0.414733	3.14069	2.20966	-0.507257
Arabidopsis	root vs. shoot	AT4G10500	0.596545	0.0375712	0.414969	2.43831	26.746	3.45537
Arabidopsis	root vs. shoot	AT3G27440	0.559156	0.0376518	0.415209	11.6148	1.46684	-2.98518
Arabidopsis	root vs. shoot	AT1G30130	0.0216939	0.0376385	0.415209	4.59833	6.74829	0.553413
Arabidopsis	root vs. shoot	AT2G46210	0.0925112	0.0376185	0.415209	1.18021	2.58729	1.13239
Arabidopsis	root vs. shoot	AT5G09460	0.454505	0.0376913	0.415282	0.459655	0.0854319	-2.42771
Arabidopsis	root vs. shoot	AT3G07290	0.201183	0.0377411	0.415282	1.0166	3.15858	1.63553
Arabidopsis	root vs. shoot	AT1G77390	0.457992	0.0377423	0.415282	1.42146	8.18799	2.52613
Arabidopsis	root vs. shoot	AT1G77680	0.0392774	0.0377565	0.415282	1.75645	1.0779	-0.70444
Arabidopsis	root vs. shoot	AT5G61030	0.025742	0.0377221	0.415282	6.47517	9.9333	0.617355
Arabidopsis	root vs. shoot	AT3G48570	0.0623643	0.0378015	0.415562	3.529	1.8817	-0.907224
Arabidopsis	root vs. shoot	AT4G22860	0.0663709	0.0378546	0.415929	5.84872	2.94804	-0.988367
Arabidopsis	root vs. shoot	AT4G30690	0.0619203	0.0380376	0.417723	4.5929	2.42387	-0.922095
Arabidopsis	root vs. shoot	AT4G10720	1.50591	0.0380656	0.417814	2.81113	13.0081	2.21019
Arabidopsis	root vs. shoot	AT3G24650	0.692133	0.0380949	0.417918	49.5885	4.57096	-3.43943
Arabidopsis	root vs. shoot	AT5G09280	1.31077	0.0382679	0.418731	0.295427	7.04736	4.57621
Arabidopsis	root vs. shoot	AT1G27380	0.332255	0.0382155	0.418731	3.34017	0.774383	-2.1088
Arabidopsis	root vs. shoot	AT3G02310	1.64771	0.0382156	0.418731	25.1768	0.775393	-5.02102
Arabidopsis	root vs. shoot	AT3G14395	1.08949	0.0382655	0.418731	1.57623	0.385969	-2.02992
Arabidopsis	root vs. shoot	AT5G45330	0.125332	0.038253	0.418731	2.23562	5.42085	1.27785
Arabidopsis	root vs. shoot	AT1G51400	0.0728898	0.0382879	0.418733	4.7885	2.44047	-0.972418
Arabidopsis	root vs. shoot	AT1G52060	0.0152671	0.0383392	0.419077	6.20294	8.94712	0.528472
Arabidopsis	root vs. shoot	AT3G55920	0.0641351	0.0385273	0.419439	6.90003	3.67535	-0.908719
Arabidopsis	root vs. shoot	AT2G28180	1.7396	0.0384984	0.419439	165.872	3.4883	-5.5714
Arabidopsis	root vs. shoot	AT1G21450	0.0171377	0.0385733	0.419439	3.364	4.7394	0.494528
Arabidopsis	root vs. shoot	AT1G73730	0.0307948	0.0385036	0.419439	3.598	2.31288	-0.637506
Arabidopsis	root vs. shoot	AT3G48870	0.00915742	0.0386014	0.419439	5.37925	6.77965	0.333807
Arabidopsis	root vs. shoot	AT4G24790	0.178209	0.0385964	0.419439	1.55114	4.36992	1.49428
Arabidopsis	root vs. shoot	AT3G22760	0.0534253	0.0385173	0.419439	3.43428	1.84567	-0.895867
Arabidopsis	root vs. shoot	AT4G38040	0.033918	0.0385633	0.419439	3.3691	5.31138	0.656723
Arabidopsis	root vs. shoot	AT4G09170	1.73237	0.0386024	0.419439	0.158107	6.34658	5.32701
Arabidopsis	root vs. shoot	AT5G47440	0.408047	0.0386101	0.419439	2.7134	0.546042	-2.31302
Arabidopsis	root vs. shoot	AT3G63510	0.103544	0.0384189	0.419439	4.2057	1.87902	-1.16237
Arabidopsis	root vs. shoot	AT2G28670	0.0616131	0.0384603	0.419439	6.16963	12.8072	1.0537
Arabidopsis	root vs. shoot	AT4G10280	0.0445063	0.038788	0.421155	5.63985	3.25813	-0.791609
Arabidopsis	root vs. shoot	AT5G08580	0.0299573	0.0388136	0.421217	4.55856	2.96762	-0.61927
Arabidopsis	root vs. shoot	AT3G03070	0.0221085	0.0388645	0.421553	3.08968	4.43741	0.52226
Arabidopsis	root vs. shoot	AT3G24610	1.67098	0.0388857	0.421567	0.495205	18.2997	5.20765
Arabidopsis	root vs. shoot	AT4G02920	0.0185063	0.0389202	0.421725	2.21526	3.0891	0.47971
Arabidopsis	root vs. shoot	AT4G29140	0.0187083	0.0389561	0.421898	5.08931	7.25907	0.512313
Arabidopsis	root vs. shoot	AT5G58980	0.739719	0.0392259	0.424603	0.609276	0.0680155	-3.16316
Arabidopsis	root vs. shoot	AT3G16170	0.0270748	0.0392842	0.425016	2.99228	4.52817	0.597681
Arabidopsis	root vs. shoot	AT4G30620	0.041216	0.039453	0.426407	7.31261	4.38862	-0.736619
Arabidopsis	root vs. shoot	AT2G25820	0.634366	0.03944	0.426407	1.96447	29.8248	3.9243
Arabidopsis	root vs. shoot	AT1G73950	0.152407	0.0395032	0.426731	1.9904	0.761495	-1.38615
Arabidopsis	root vs. shoot	AT3G20557	0.255627	0.0395579	0.426887	4.32428	0.279749	-3.95026
Arabidopsis	root vs. shoot	AT3G52760	0.0287596	0.0395379	0.426887	3.47254	5.33633	0.619856
Arabidopsis	root vs. shoot	AT5G63530	0.0569382	0.0396038	0.426975	5.98152	10.8275	0.856113
Arabidopsis	root vs. shoot	AT2G15320	0.0624371	0.0396064	0.426975	3.41908	6.45757	0.917382
Arabidopsis	root vs. shoot	AT2G21490	1.78501	0.0396273	0.426982	12.1508	4.1059	-1.56528
Arabidopsis	root vs. shoot	AT3G52500	0.0176753	0.0396758	0.42707	4.54895	6.27942	0.465096
Arabidopsis	root vs. shoot	AT2G35860	0.0179494	0.0396648	0.42707	4.03068	5.60411	0.475462
Arabidopsis	root vs. shoot	AT2G31990	0.132405	0.0397683	0.427848	4.6695	1.78464	-1.38764
Arabidopsis	root vs. shoot	AT1G17050	0.022311	0.0398021	0.427994	4.09427	5.88741	0.524025
Arabidopsis	root vs. shoot	AT2G16370	0.0215315	0.0399331	0.429185	3.58029	2.48196	-0.528597
Arabidopsis	root vs. shoot	AT4G21750	0.14566	0.0399579	0.429234	7.84248	3.09797	-1.33999
Arabidopsis	root vs. shoot	AT4G21540	0.0397401	0.0400087	0.429561	2.35012	3.84356	0.709709
Arabidopsis	root vs. shoot	AT4G12680	0.920986	0.0401958	0.430913	1.15843	0.105115	-3.46213
Arabidopsis	root vs. shoot	AT4G30280	0.0135258	0.0401877	0.430913	5.08025	3.81937	-0.411566
Arabidopsis	root vs. shoot	AT5G55590	0.999101	0.0401588	0.430913	15.1733	0.969647	-3.96793
Arabidopsis	root vs. shoot	AT1G56560	0.0677654	0.0402242	0.431	4.00184	7.53087	0.912152
Arabidopsis	root vs. shoot	AT3G27490	0.686396	0.0402943	0.431096	2.77341	27.4258	3.3058
Arabidopsis	root vs. shoot	AT1G13770	0.291697	0.0402694	0.431096	3.80837	13.9929	1.87745
Arabidopsis	root vs. shoot	AT1G78620	0.0321095	0.0402919	0.431096	3.03888	4.693	0.626972
Arabidopsis	root vs. shoot	AT2G47910	0.0441275	0.0403306	0.431266	5.17267	2.91112	-0.829337
Arabidopsis	root vs. shoot	AT5G62500	0.04118	0.0404728	0.432211	7.72157	4.59293	-0.749477
Arabidopsis	root vs. shoot	AT1G27970	0.0166757	0.0405414	0.432211	3.59137	4.91857	0.453703
Arabidopsis	root vs. shoot	AT5G53650	0.0279209	0.0405378	0.432211	6.57382	4.32242	-0.604893
Arabidopsis	root vs. shoot	AT1G04150	0.844547	0.0405137	0.432211	2.2759	29.0962	3.67632
Arabidopsis	root vs. shoot	AT5G54790	0.2249	0.040458	0.432211	7.18606	1.79098	-2.00445
Arabidopsis	root vs. shoot	AT3G18580	0.0381294	0.0405032	0.432211	3.90772	6.43304	0.719176
Arabidopsis	root vs. shoot	AT3G61280	1.53885	0.0405977	0.432592	0.798097	21.8203	4.77296
Arabidopsis	root vs. shoot	AT2G25350	0.180634	0.0406471	0.432901	1.78388	5.04762	1.50058
Arabidopsis	root vs. shoot	AT5G63920	0.365903	0.0407425	0.433698	0.324888	1.41759	2.12542
Arabidopsis	root vs. shoot	AT2G40550	0.0308281	0.04077	0.433773	3.8968	6.00283	0.623355
Arabidopsis	root vs. shoot	AT2G48130	0.053966	0.0408955	0.43489	2.79829	5.26578	0.912103
Arabidopsis	root vs. shoot	AT4G15215	0.351762	0.0409752	0.435519	1.84956	0.450992	-2.03601
Arabidopsis	root vs. shoot	AT1G05960	0.0337882	0.0410156	0.435729	1.70105	2.64341	0.635977
Arabidopsis	root vs. shoot	AT4G23410	0.0690014	0.0411231	0.435777	4.70743	2.40417	-0.969398
Arabidopsis	root vs. shoot	AT3G10570	0.194516	0.0410896	0.435777	1.2993	4.86358	1.90429
Arabidopsis	root vs. shoot	AT1G53820	2.10474	0.0410532	0.435777	0.597942	26.6257	5.47667
Arabidopsis	root vs. shoot	AT4G22758	0.612415	0.0411172	0.435777	3.40807	23.6742	2.79629
Arabidopsis	root vs. shoot	AT4G15900	0.0258807	0.0410938	0.435777	2.96816	4.38024	0.561441
Arabidopsis	root vs. shoot	AT1G03260	0.116913	0.0411452	0.435793	3.43711	1.45227	-1.24289
Arabidopsis	root vs. shoot	AT4G34419	0.998397	0.0411789	0.435932	1.60982	22.2674	3.78996
[truncated: 91,669 more rows]

## Sheet: Table S8
Duplication type	Species	tissue type/condition	GO ID	Term	Annotated	p-value	q-value	Aspect
WGD	Arabidopsis	root vs. shoot	GO:0009521	photosystem	16	8.3e-15	4.872e-12	C
WGD	Arabidopsis	root vs. shoot	GO:0044436	thylakoid part	31	3.5e-14	1.027e-11	C
WGD	Arabidopsis	root vs. shoot	GO:0034357	photosynthetic membrane	29	6e-14	1.115e-11	C
WGD	Arabidopsis	root vs. shoot	GO:0009535	chloroplast thylakoid membrane	28	7.6e-14	1.115e-11	C
WGD	Arabidopsis	root vs. shoot	GO:0055035	plastid thylakoid membrane	28	1.2e-13	1.409e-11	C
WGD	Arabidopsis	root vs. shoot	GO:0042651	thylakoid membrane	28	3.1e-13	3.033e-11	C
WGD	Arabidopsis	root vs. shoot	GO:0009579	thylakoid	34	5.2e-13	4.361e-11	C
WGD	Arabidopsis	root vs. shoot	GO:0009534	chloroplast thylakoid	30	1.3e-12	9.539e-11	C
WGD	Arabidopsis	root vs. shoot	GO:0031976	plastid thylakoid	30	1.9e-12	1.239e-10	C
WGD	Arabidopsis	root vs. shoot	GO:0015979	photosynthesis	22	8.5e-12	2.95e-08	P
WGD	Arabidopsis	root vs. shoot	GO:0009523	photosystem II	10	6.1e-09	3.581e-07	C
WGD	Arabidopsis	root vs. shoot	GO:0031977	thylakoid lumen	13	8.8e-09	4.696e-07	C
WGD	Arabidopsis	root vs. shoot	GO:0010287	plastoglobule	11	1.8e-08	8.805e-07	C
WGD	Arabidopsis	root vs. shoot	GO:0044434	chloroplast part	47	4.5e-08	2.032e-06	C
WGD	Arabidopsis	root vs. shoot	GO:0044435	plastid part	47	7.7e-08	3.229e-06	C
WGD	Arabidopsis	root vs. shoot	GO:0009522	photosystem I	8	1.4e-07	5.479e-06	C
WGD	Arabidopsis	root vs. shoot	GO:0031984	organelle subcompartment	38	1.5e-07	5.503e-06	C
WGD	Arabidopsis	root vs. shoot	GO:0030095	chloroplast photosystem II	7	3.1e-07	1.011e-05	C
WGD	Arabidopsis	root vs. shoot	GO:0098807	chloroplast thylakoid membrane protein complex	7	3.1e-07	1.011e-05	C
WGD	Arabidopsis	root vs. shoot	GO:0009507	chloroplast	68	3.9e-07	1.205e-05	C
WGD	Arabidopsis	root vs. shoot	GO:0009538	photosystem I reaction center	6	4.7e-07	1.379e-05	C
WGD	Arabidopsis	root vs. shoot	GO:0009543	chloroplast thylakoid lumen	10	6.2e-07	1.654e-05	C
WGD	Arabidopsis	root vs. shoot	GO:0031978	plastid thylakoid lumen	10	6.2e-07	1.654e-05	C
WGD	Arabidopsis	root vs. shoot	GO:0009536	plastid	69	9.8e-07	2.501e-05	C
WGD	Arabidopsis	root vs. shoot	GO:0009570	chloroplast stroma	27	8.4e-06	0.0002054	C
WGD	Arabidopsis	root vs. shoot	GO:0009532	plastid stroma	27	1.3e-05	0.0003052	C
WGD	Arabidopsis	root vs. shoot	GO:0009654	photosystem II oxygen evolving complex	5	3e-05	0.0006773	C
WGD	Arabidopsis	root vs. shoot	GO:0009941	chloroplast envelope	24	6.6e-05	0.001435	C
WGD	Arabidopsis	root vs. shoot	GO:0009526	plastid envelope	24	0.00013	0.002725	C
WGD	Arabidopsis	root vs. shoot	GO:1990204	oxidoreductase complex	11	0.00099	0.02004	C
WGD	Arabidopsis	root vs. shoot	GO:0031969	chloroplast membrane	10	0.00133	0.02602	C
WGD	Arabidopsis	root vs. shoot	GO:0042170	plastid membrane	10	0.00164	0.03105	C
WGD	Arabidopsis	seedling normal vs. seedling hypoxia	GO:0022626	cytosolic ribosome	48	2.6e-22	1.526e-19	C
WGD	Arabidopsis	seedling normal vs. seedling hypoxia	GO:0005840	ribosome	50	9.4e-22	2.759e-19	C
WGD	Arabidopsis	seedling normal vs. seedling hypoxia	GO:0044445	cytosolic part	48	1.2e-20	2.348e-18	C
WGD	Arabidopsis	seedling normal vs. seedling hypoxia	GO:0044391	ribosomal subunit	41	2e-19	2.935e-17	C
WGD	Arabidopsis	seedling normal vs. seedling hypoxia	GO:0003735	structural constituent of ribosome	42	4.6e-19	6.256e-16	F
WGD	Arabidopsis	seedling normal vs. seedling hypoxia	GO:0030529	ribonucleoprotein complex	57	3.9e-17	4.579e-15	C
WGD	Arabidopsis	seedling normal vs. seedling hypoxia	GO:0005198	structural molecule activity	48	3.2e-17	2.176e-14	F
WGD	Arabidopsis	seedling normal vs. seedling hypoxia	GO:0022625	cytosolic large ribosomal subunit	30	2.5e-16	2.446e-14	C
WGD	Arabidopsis	seedling normal vs. seedling hypoxia	GO:0015934	large ribosomal subunit	30	6.6e-16	5.535e-14	C
WGD	Arabidopsis	seedling normal vs. seedling hypoxia	GO:0006412	translation	46	5.3e-16	9.198e-13	P
WGD	Arabidopsis	seedling normal vs. seedling hypoxia	GO:0043043	peptide biosynthetic process	46	5.3e-16	9.198e-13	P
WGD	Arabidopsis	seedling normal vs. seedling hypoxia	GO:0006518	peptide metabolic process	48	1.1e-15	1.273e-12	P
WGD	Arabidopsis	seedling normal vs. seedling hypoxia	GO:0043603	cellular amide metabolic process	50	1.6e-15	1.388e-12	P
WGD	Arabidopsis	seedling normal vs. seedling hypoxia	GO:0043604	amide biosynthetic process	46	3.1e-15	2.152e-12	P
WGD	Arabidopsis	seedling normal vs. seedling hypoxia	GO:0043228	non-membrane-bounded organelle	75	2.3e-13	1.5e-11	C
WGD	Arabidopsis	seedling normal vs. seedling hypoxia	GO:0043232	intracellular non-membrane-bounded organelle	75	2.3e-13	1.5e-11	C
WGD	Arabidopsis	seedling normal vs. seedling hypoxia	GO:0042254	ribosome biogenesis	30	7.5e-14	4.339e-11	P
WGD	Arabidopsis	seedling normal vs. seedling hypoxia	GO:1901566	organonitrogen compound biosynthetic process	62	1.1e-13	5.454e-11	P
WGD	Arabidopsis	seedling normal vs. seedling hypoxia	GO:0022613	ribonucleoprotein complex biogenesis	34	9.6e-13	4.165e-10	P
WGD	Arabidopsis	seedling normal vs. seedling hypoxia	GO:0032991	macromolecular complex	100	5.5e-11	3.229e-09	C
WGD	Arabidopsis	seedling normal vs. seedling hypoxia	GO:0044444	cytoplasmic part	188	4.8e-10	2.561e-08	C
WGD	Arabidopsis	seedling normal vs. seedling hypoxia	GO:0005829	cytosol	83	7.9e-10	3.864e-08	C
WGD	Arabidopsis	seedling normal vs. seedling hypoxia	GO:0044267	cellular protein metabolic process	128	1.4e-10	5.399e-08	P
WGD	Arabidopsis	seedling normal vs. seedling hypoxia	GO:1901564	organonitrogen compound metabolic process	68	3.1e-10	1.076e-07	P
WGD	Arabidopsis	seedling normal vs. seedling hypoxia	GO:0005737	cytoplasm	211	7.2e-09	3.251e-07	C
WGD	Arabidopsis	seedling normal vs. seedling hypoxia	GO:0042273	ribosomal large subunit biogenesis	14	1.4e-09	4.418e-07	P
WGD	Arabidopsis	seedling normal vs. seedling hypoxia	GO:0019538	protein metabolic process	129	7.5e-09	2.169e-06	P
WGD	Arabidopsis	seedling normal vs. seedling hypoxia	GO:0044422	organelle part	129	1.2e-06	5.031e-05	C
WGD	Arabidopsis	seedling normal vs. seedling hypoxia	GO:0044237	cellular metabolic process	236	2.3e-07	6.141e-05	P
WGD	Arabidopsis	seedling normal vs. seedling hypoxia	GO:0044446	intracellular organelle part	128	1.6e-06	6.261e-05	C
WGD	Arabidopsis	seedling normal vs. seedling hypoxia	GO:0019843	rRNA binding	11	2.3e-07	0.0001043	F
WGD	Arabidopsis	seedling normal vs. seedling hypoxia	GO:0009987	cellular process	286	6.7e-07	0.0001661	P
WGD	Arabidopsis	seedling normal vs. seedling hypoxia	GO:0044260	cellular macromolecule metabolic process	188	1.8e-06	0.0004165	P
WGD	Arabidopsis	seedling normal vs. seedling hypoxia	GO:0071840	cellular component organization or biogenesis	94	2.3e-06	0.000499	P
WGD	Arabidopsis	seedling normal vs. seedling hypoxia	GO:0034641	cellular nitrogen compound metabolic process	135	2.9e-06	0.0005921	P
WGD	Arabidopsis	seedling normal vs. seedling hypoxia	GO:0044085	cellular component biogenesis	46	4.1e-06	0.0007906	P
WGD	Arabidopsis	seedling normal vs. seedling hypoxia	GO:0042255	ribosome assembly	9	6.2e-06	0.001133	P
WGD	Arabidopsis	seedling normal vs. seedling hypoxia	GO:0006364	rRNA processing	12	1e-05	0.001653	P
WGD	Arabidopsis	seedling normal vs. seedling hypoxia	GO:0016072	rRNA metabolic process	12	1e-05	0.001653	P
WGD	Arabidopsis	seedling normal vs. seedling hypoxia	GO:0044464	cell part	293	6e-05	0.001989	C
WGD	Arabidopsis	seedling normal vs. seedling hypoxia	GO:0015935	small ribosomal subunit	11	6.1e-05	0.001989	C
WGD	Arabidopsis	seedling normal vs. seedling hypoxia	GO:0022627	cytosolic small ribosomal subunit	11	6.1e-05	0.001989	C
WGD	Arabidopsis	seedling normal vs. seedling hypoxia	GO:0002181	cytoplasmic translation	8	1.4e-05	0.002209	P
WGD	Arabidopsis	seedling normal vs. seedling hypoxia	GO:0006807	nitrogen compound metabolic process	139	2e-05	0.003018	P
WGD	Arabidopsis	seedling normal vs. seedling hypoxia	GO:0043170	macromolecule metabolic process	193	2.2e-05	0.003182	P
WGD	Arabidopsis	seedling normal vs. seedling hypoxia	GO:0005623	cell	293	0.00011	0.003229	C
WGD	Arabidopsis	seedling normal vs. seedling hypoxia	GO:0005730	nucleolus	21	0.00011	0.003229	C
WGD	Arabidopsis	seedling normal vs. seedling hypoxia	GO:0044271	cellular nitrogen compound biosynthetic process	107	2.4e-05	0.003332	P
WGD	Arabidopsis	seedling normal vs. seedling hypoxia	GO:0044238	primary metabolic process	227	2.6e-05	0.003471	P
WGD	Arabidopsis	seedling normal vs. seedling hypoxia	GO:0005839	proteasome core complex	6	0.00014	0.003913	C
WGD	Arabidopsis	seedling normal vs. seedling hypoxia	GO:0005773	vacuole	40	0.00018	0.004803	C
WGD	Arabidopsis	seedling normal vs. seedling hypoxia	GO:0000470	maturation of LSU-rRNA	6	6.3e-05	0.008099	P
WGD	Arabidopsis	seedling normal vs. seedling hypoxia	GO:0098805	whole membrane	39	0.00034	0.008677	C
WGD	Arabidopsis	seedling normal vs. seedling hypoxia	GO:0044424	intracellular part	257	0.00037	0.00905	C
WGD	Arabidopsis	seedling normal vs. seedling hypoxia	GO:0022618	ribonucleoprotein complex assembly	13	7.8e-05	0.009669	P
WGD	Arabidopsis	seedling normal vs. seedling hypoxia	GO:0034470	ncRNA processing	13	9.7e-05	0.01161	P
WGD	Arabidopsis	seedling normal vs. seedling hypoxia	GO:0019773	proteasome core complex, alpha-subunit complex	4	0.0005	0.01174	C
WGD	Arabidopsis	seedling normal vs. seedling hypoxia	GO:0000027	ribosomal large subunit assembly	6	0.00012	0.01344	P
WGD	Arabidopsis	seedling normal vs. seedling hypoxia	GO:0071826	ribonucleoprotein complex subunit organization	13	0.00012	0.01344	P
WGD	Arabidopsis	seedling normal vs. seedling hypoxia	GO:0005622	intracellular	259	0.00061	0.01377	C
WGD	Arabidopsis	seedling normal vs. seedling hypoxia	GO:0008152	metabolic process	250	0.00014	0.01519	P
WGD	Arabidopsis	seedling normal vs. seedling hypoxia	GO:0034660	ncRNA metabolic process	13	0.00015	0.01578	P
WGD	Arabidopsis	seedling normal vs. seedling hypoxia	GO:0044437	vacuolar part	27	0.00085	0.01848	C
WGD	Arabidopsis	seedling normal vs. seedling hypoxia	GO:0071704	organic substance metabolic process	230	0.00021	0.02144	P
WGD	Arabidopsis	seedling normal vs. seedling hypoxia	GO:0003723	RNA binding	36	6.5e-05	0.0221	F
WGD	Arabidopsis	seedling normal vs. seedling hypoxia	GO:0004298	threonine-type endopeptidase activity	6	0.00011	0.02493	F
WGD	Arabidopsis	seedling normal vs. seedling hypoxia	GO:0070003	threonine-type peptidase activity	6	0.00011	0.02493	F
WGD	Arabidopsis	seedling normal vs. seedling hypoxia	GO:0034622	cellular macromolecular complex assembly	22	0.00027	0.02678	P
WGD	Arabidopsis	seedling normal vs. seedling hypoxia	GO:0043229	intracellular organelle	229	0.00133	0.02788	C
WGD	Arabidopsis	seedling normal vs. seedling hypoxia	GO:0043226	organelle	229	0.00141	0.02854	C
WGD	Arabidopsis	seedling normal vs. seedling hypoxia	GO:0010467	gene expression	105	0.0003	0.02892	P
WGD	Arabidopsis	seedling normal vs. seedling hypoxia	GO:0005774	vacuolar membrane	26	0.00172	0.03365	C
WGD	Arabidopsis	seedling normal vs. seedling hypoxia	GO:0070925	organelle assembly	10	0.0004	0.03752	P
WGD	Arabidopsis	seedling normal vs. seedling hypoxia	GO:0006301	postreplication repair	4	0.00044	0.04019	P
WGD	Arabidopsis	seedling normal vs. seedling hypoxia	GO:0043933	macromolecular complex subunit organization	34	0.00054	0.04806	P
WGD	maize	seedling normal vs. seedling drought	GO:0005198	structural molecule activity	46	4.2e-10	3.196e-07	F
WGD	maize	seedling normal vs. seedling drought	GO:0003735	structural constituent of ribosome	37	1.4e-08	5.327e-06	F
WGD	maize	seedling normal vs. seedling drought	GO:1901564	organonitrogen compound metabolic process	85	3.5e-09	7.424e-06	P
WGD	maize	seedling normal vs. seedling drought	GO:0005840	ribosome	43	2.7e-08	1.01e-05	C
WGD	maize	seedling normal vs. seedling drought	GO:1901566	organonitrogen compound biosynthetic process	67	1.2e-08	1.273e-05	P
WGD	maize	seedling normal vs. seedling drought	GO:0032991	macromolecular complex	111	9.3e-08	1.739e-05	C
WGD	maize	seedling normal vs. seedling drought	GO:0043603	cellular amide metabolic process	49	4.6e-08	2.969e-05	P
WGD	maize	seedling normal vs. seedling drought	GO:0006518	peptide metabolic process	48	5.9e-08	2.969e-05	P
WGD	maize	seedling normal vs. seedling drought	GO:0006412	translation	46	9.8e-08	2.969e-05	P
WGD	maize	seedling normal vs. seedling drought	GO:0043043	peptide biosynthetic process	46	9.8e-08	2.969e-05	P
WGD	maize	seedling normal vs. seedling drought	GO:0043604	amide biosynthetic process	46	9.8e-08	2.969e-05	P
WGD	maize	seedling normal vs. seedling drought	GO:0030529	ribonucleoprotein complex	48	4.6e-07	5.735e-05	C
WGD	maize	seedling normal vs. seedling drought	GO:0044444	cytoplasmic part	183	8.1e-06	0.000748	C
WGD	maize	seedling normal vs. seedling drought	GO:0043228	non-membrane-bounded organelle	62	1.2e-05	0.000748	C
WGD	maize	seedling normal vs. seedling drought	GO:0043232	intracellular non-membrane-bounded organelle	62	1.2e-05	0.000748	C
WGD	maize	seedling normal vs. seedling drought	GO:0005737	cytoplasm	198	5.2e-05	0.002778	C
WGD	maize	seedling normal vs. seedling drought	GO:0022626	cytosolic ribosome	17	9.2e-05	0.004301	C
WGD	maize	seedling normal vs. seedling drought	GO:0015935	small ribosomal subunit	7	0.00015	0.0051	C
WGD	maize	seedling normal vs. seedling drought	GO:0022627	cytosolic small ribosomal subunit	7	0.00015	0.0051	C
WGD	maize	seedling normal vs. seedling drought	GO:0044445	cytosolic part	18	0.00015	0.0051	C
WGD	maize	seedling normal vs. seedling drought	GO:0044422	organelle part	121	0.00031	0.008918	C
WGD	maize	seedling normal vs. seedling drought	GO:0044446	intracellular organelle part	121	0.00031	0.008918	C
WGD	maize	seedling normal vs. seedling drought	GO:0031967	organelle envelope	39	0.00111	0.02768	C
WGD	maize	seedling normal vs. seedling drought	GO:0031975	envelope	39	0.00111	0.02768	C
WGD	maize	seedling normal vs. seedling drought	GO:0098796	membrane protein complex	28	0.00183	0.04278	C
WGD	maize	seedling normal vs. seedling drought	GO:0044391	ribosomal subunit	11	0.00201	0.04422	C
TD	Arabidopsis	root vs. shoot	GO:0009526	plastid envelope	11	5.5e-05	0.004775	C
TD	Arabidopsis	root vs. shoot	GO:0009941	chloroplast envelope	11	5.5e-05	0.004775	C
TD	Arabidopsis	root vs. shoot	GO:0009521	photosystem	4	7.5e-05	0.004775	C
TD	Arabidopsis	root vs. shoot	GO:0009522	photosystem I	4	7.5e-05	0.004775	C
TD	Arabidopsis	root vs. shoot	GO:0009523	photosystem II	4	7.5e-05	0.004775	C
TD	Arabidopsis	root vs. shoot	GO:0030076	light-harvesting complex	4	7.5e-05	0.004775	C
TD	Arabidopsis	root vs. shoot	GO:0009579	thylakoid	8	0.00015	0.008186	C
TD	Arabidopsis	root vs. shoot	GO:0031984	organelle subcompartment	10	0.00041	0.01958	C
TD	Arabidopsis	root vs. shoot	GO:0031967	organelle envelope	13	0.00094	0.03591	C
TD	Arabidopsis	root vs. shoot	GO:0031975	envelope	13	0.00094	0.03591	C
TD	Arabidopsis	root vs. shoot	GO:0044444	cytoplasmic part	60	0.00136	0.04723	C
TD	maize	seedling normal vs. seedling drought	GO:0006412	translation	19	4.3e-09	8.97e-07	P
TD	maize	seedling normal vs. seedling drought	GO:0006518	peptide metabolic process	19	4.3e-09	8.97e-07	P
TD	maize	seedling normal vs. seedling drought	GO:0043043	peptide biosynthetic process	19	4.3e-09	8.97e-07	P
TD	maize	seedling normal vs. seedling drought	GO:0043603	cellular amide metabolic process	19	4.3e-09	8.97e-07	P
TD	maize	seedling normal vs. seedling drought	GO:0043604	amide biosynthetic process	19	4.3e-09	8.97e-07	P
TD	maize	seedling normal vs. seedling drought	GO:1901566	organonitrogen compound biosynthetic process	22	1.7e-08	2.955e-06	P
TD	maize	seedling normal vs. seedling drought	GO:0005840	ribosome	15	1.9e-08	3.173e-06	C
TD	maize	seedling normal vs. seedling drought	GO:0003735	structural constituent of ribosome	14	1.9e-08	3.601e-06	F
TD	maize	seedling normal vs. seedling drought	GO:0005198	structural molecule activity	14	1.9e-08	3.601e-06	F
TD	maize	seedling normal vs. seedling drought	GO:0044444	cytoplasmic part	33	2e-07	1.67e-05	C
TD	maize	seedling normal vs. seedling drought	GO:1901564	organonitrogen compound metabolic process	25	1.4e-07	2.086e-05	P
TD	maize	seedling normal vs. seedling drought	GO:0005737	cytoplasm	36	4.7e-07	2.505e-05	C
TD	maize	seedling normal vs. seedling drought	GO:0022626	cytosolic ribosome	11	6e-07	2.505e-05	C
TD	maize	seedling normal vs. seedling drought	GO:0044445	cytosolic part	11	2.3e-06	6.68e-05	C
TD	maize	seedling normal vs. seedling drought	GO:0044391	ribosomal subunit	10	2.8e-06	6.68e-05	C
TD	maize	seedling normal vs. seedling drought	GO:0043228	non-membrane-bounded organelle	16	3.2e-06	6.68e-05	C
TD	maize	seedling normal vs. seedling drought	GO:0043232	intracellular non-membrane-bounded organelle	16	3.2e-06	6.68e-05	C
TD	maize	seedling normal vs. seedling drought	GO:0005829	cytosol	16	6.3e-06	0.0001052	C
TD	maize	seedling normal vs. seedling drought	GO:0030529	ribonucleoprotein complex	16	6.3e-06	0.0001052	C
TD	maize	seedling normal vs. seedling drought	GO:0032991	macromolecular complex	21	2e-05	0.0003036	C
TD	maize	seedling normal vs. seedling drought	GO:0009507	chloroplast	11	0.0002	0.002783	C
TD	maize	seedling normal vs. seedling drought	GO:0015935	small ribosomal subunit	6	0.00032	0.003817	C
TD	maize	seedling normal vs. seedling drought	GO:0022627	cytosolic small ribosomal subunit	6	0.00032	0.003817	C
TD	maize	seedling normal vs. seedling drought	GO:0009536	plastid	11	0.00037	0.004119	C
TD	maize	seedling normal vs. seedling drought	GO:0044424	intracellular part	42	0.0004	0.004126	C
TD	maize	seedling normal vs. seedling drought	GO:0005622	intracellular	43	0.00042	0.004126	C
TD	maize	seedling normal vs. seedling drought	GO:0044267	cellular protein metabolic process	34	8.6e-05	0.01121	P
TD	maize	seedling normal vs. seedling drought	GO:0044464	cell part	45	0.00159	0.01475	C
TD	maize	seedling normal vs. seedling drought	GO:0044422	organelle part	18	0.00257	0.02146	C
TD	maize	seedling normal vs. seedling drought	GO:0044446	intracellular organelle part	18	0.00257	0.02146	C
TD	maize	seedling normal vs. seedling drought	GO:0005623	cell	45	0.00494	0.03928	C
TD	maize	seedling normal vs. seedling drought	GO:0010467	gene expression	27	0.00036	0.04172	P
TD	maize	seedling normal vs. seedling drought	GO:0015934	large ribosomal subunit	4	0.00634	0.04603	C
TD	maize	seedling normal vs. seedling drought	GO:0022625	cytosolic large ribosomal subunit	4	0.00634	0.04603	C
TD	maize	seedling normal vs. seedling drought	GO:0009059	macromolecule biosynthetic process	24	0.00052	0.04931	P
TD	maize	seedling normal vs. seedling drought	GO:0034645	cellular macromolecule biosynthetic process	24	0.00052	0.04931	P
